# Supplementary material for: Tas2R signaling enhances mouse neutrophil migration via a ROCK-dependent pathway
Source: PubMed Central journal article supplement (PMC9436316; doi:10.3389/fimmu.2022.973880), 2022-08-18

Gene: Tas2r102

Expression Value Normalized by DESeq2

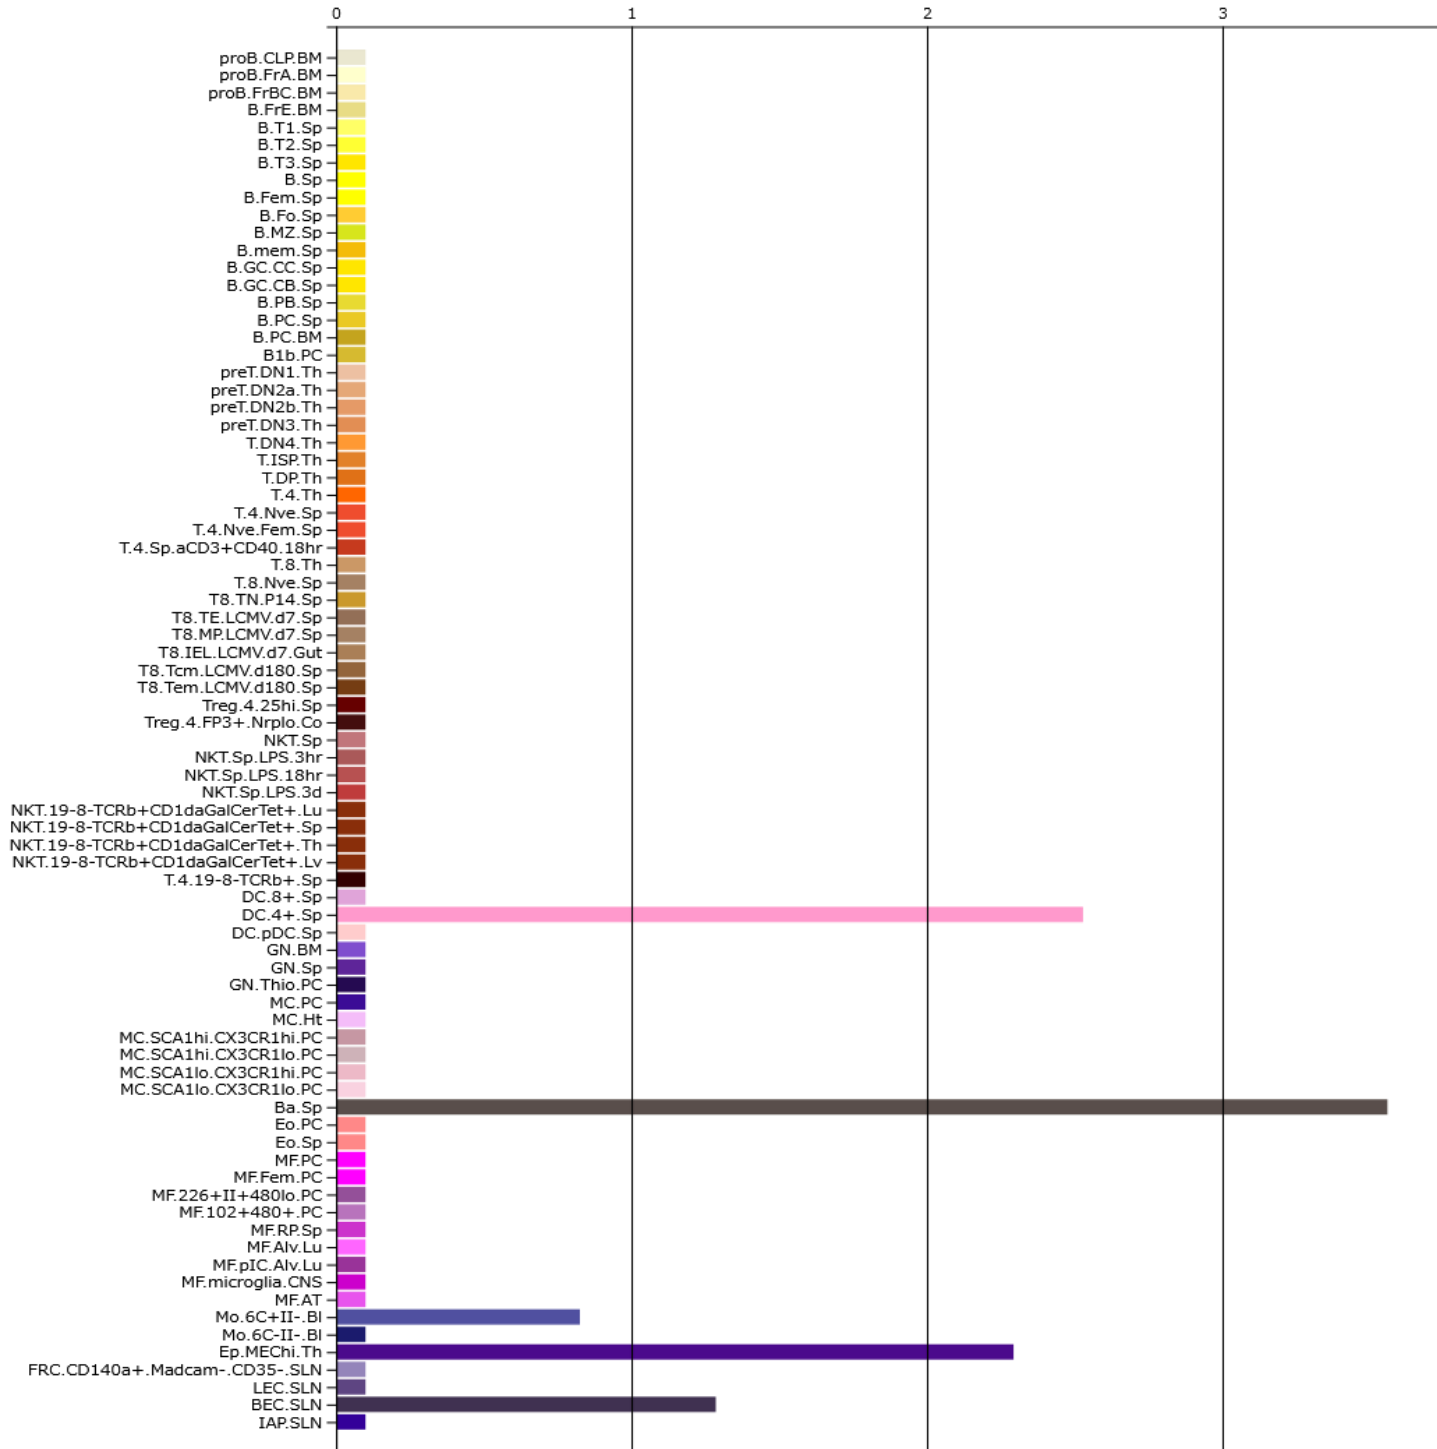

Expression Value Range

Gene: Tas2r103

Expression Value Normalized by DESeq2

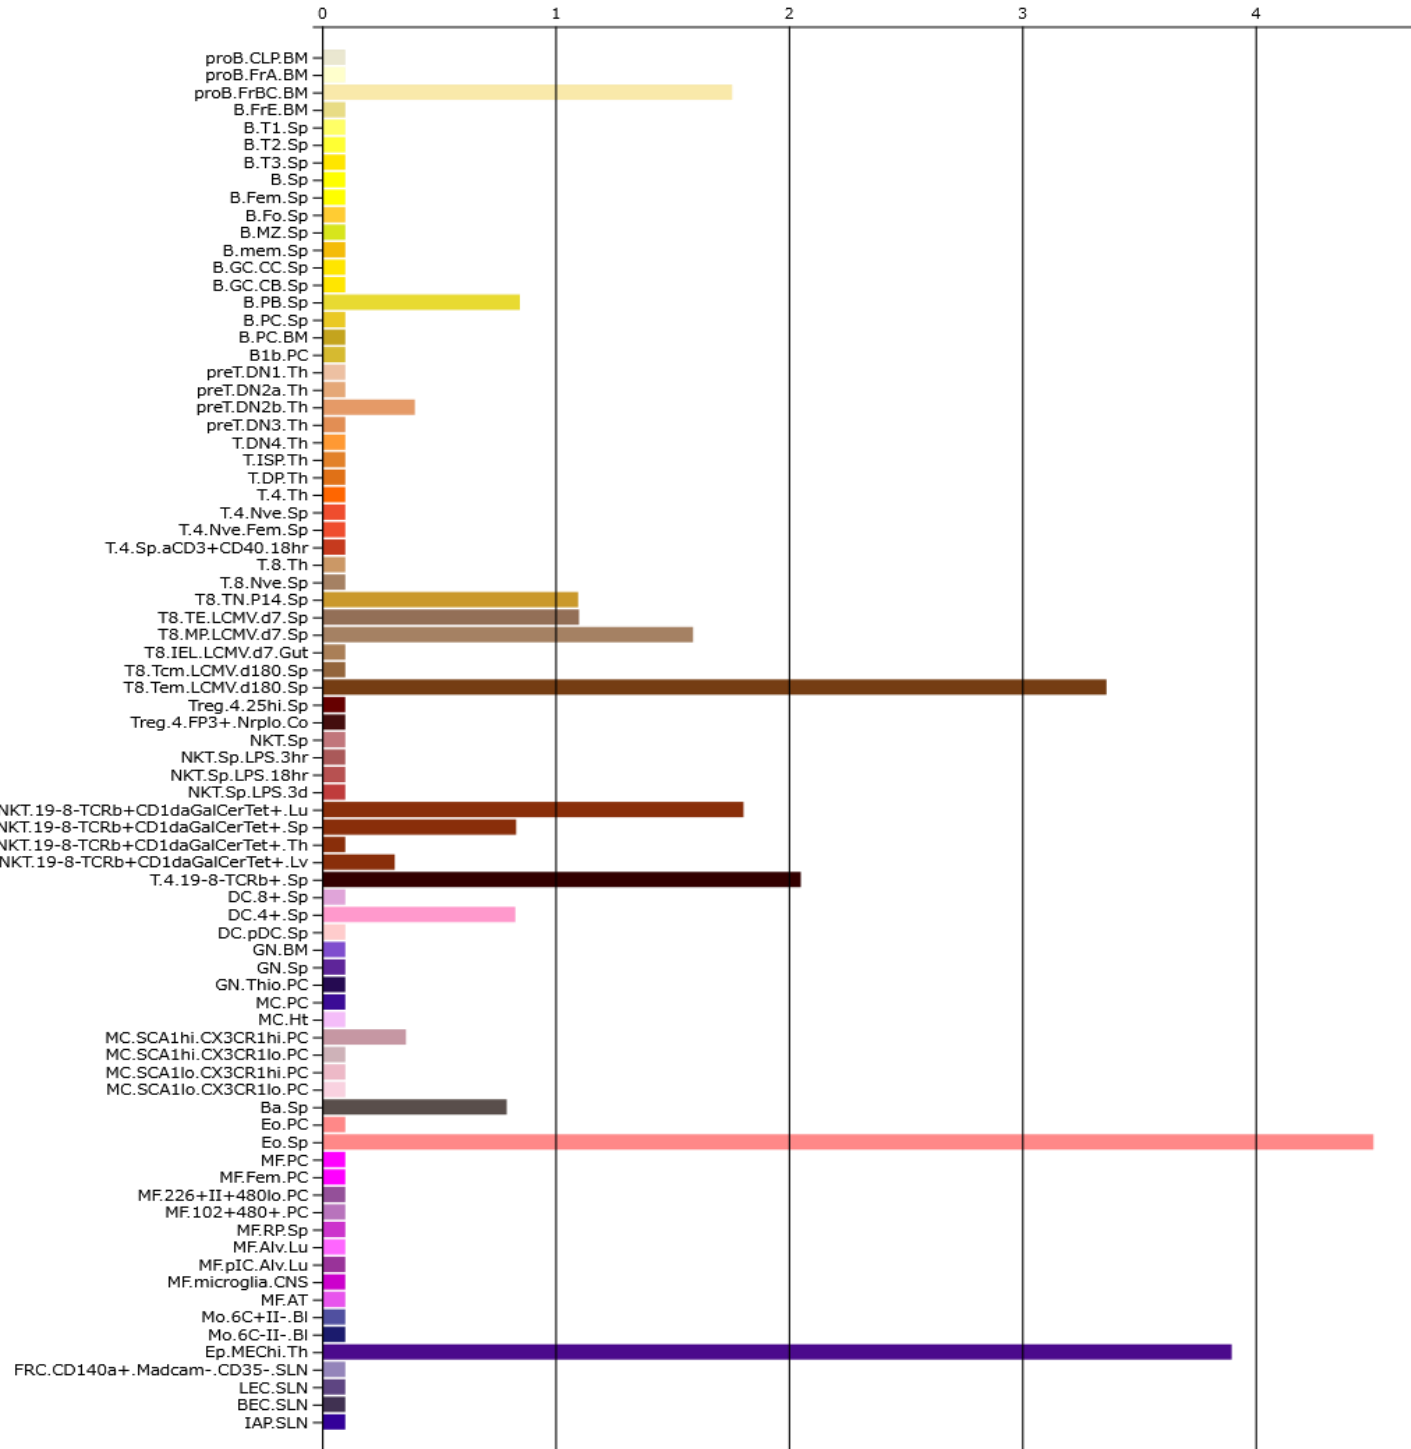

Expression Value Range

**Gene: Tas2r104**

Expression Value Normalized by DESeq2

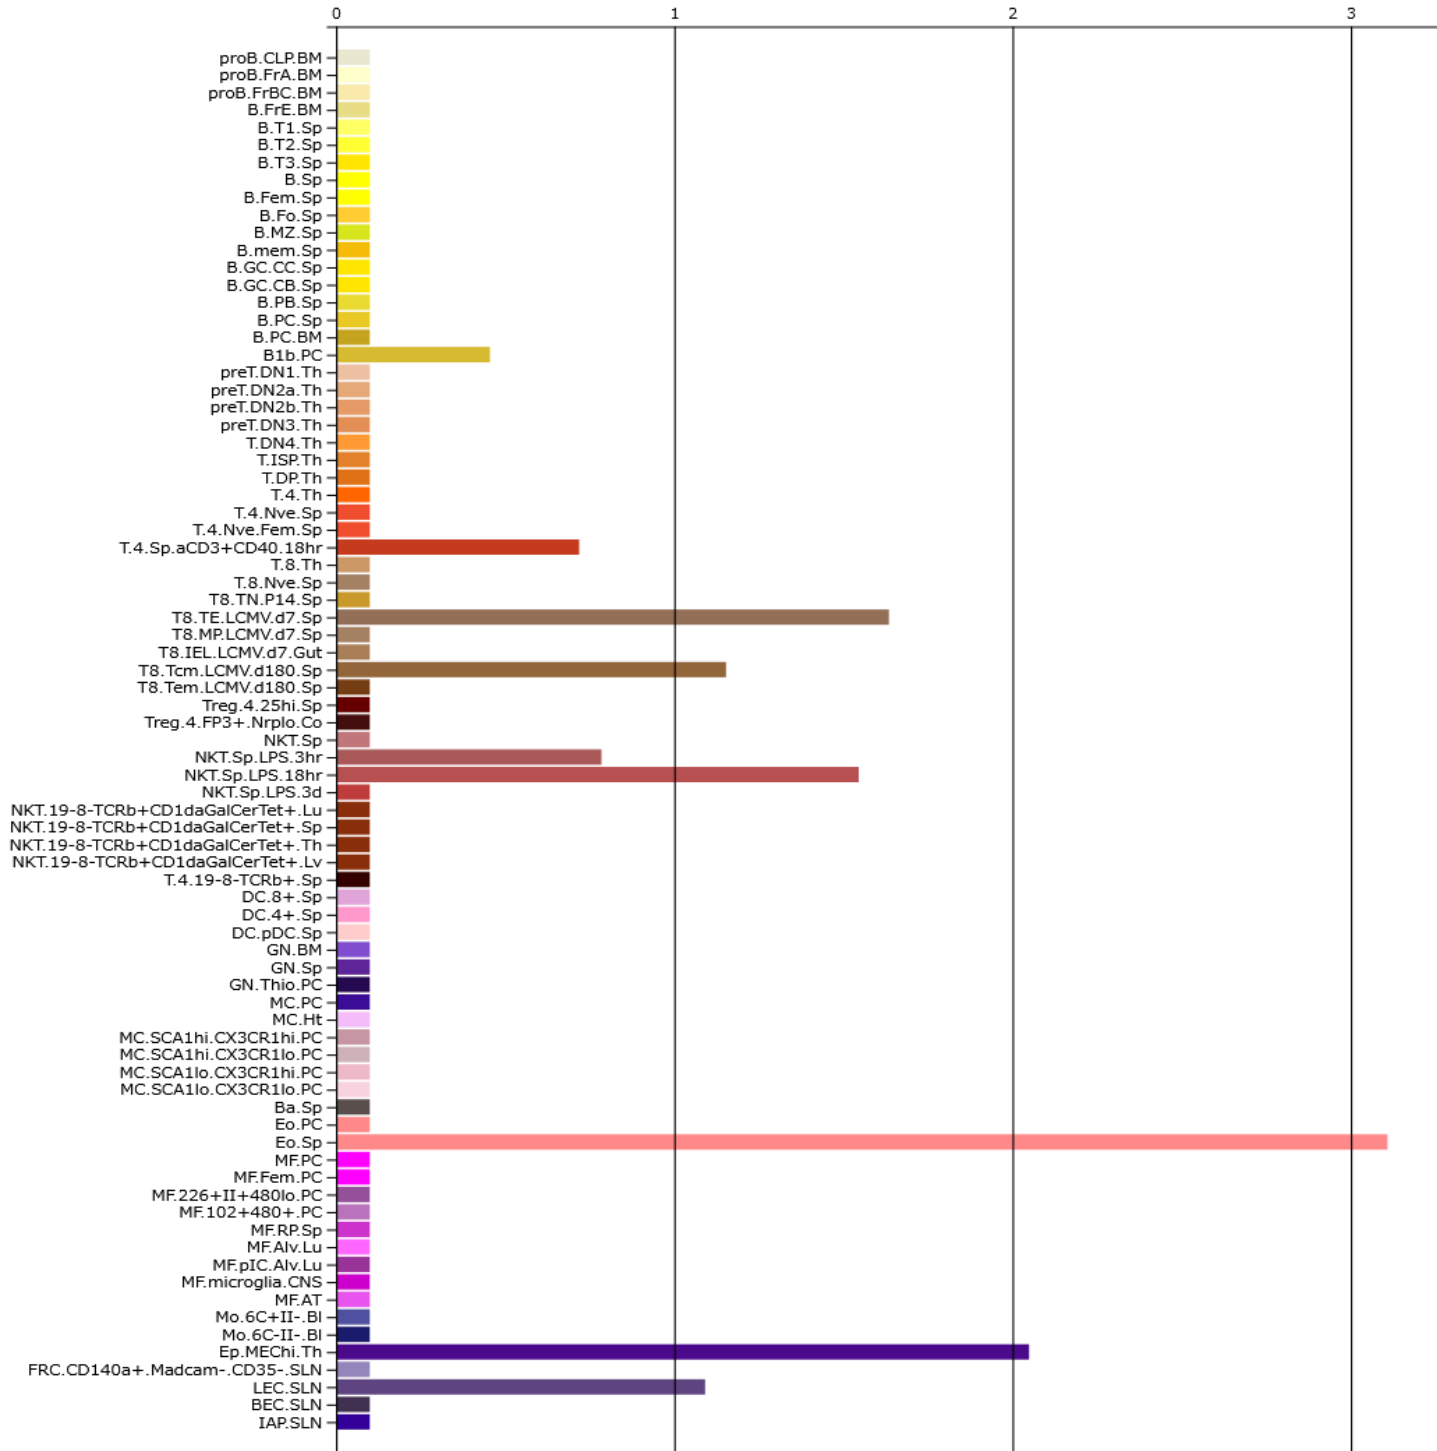

Expression Value Range

**Gene: Tas2r105**

Expression Value Normalized by DESeq2

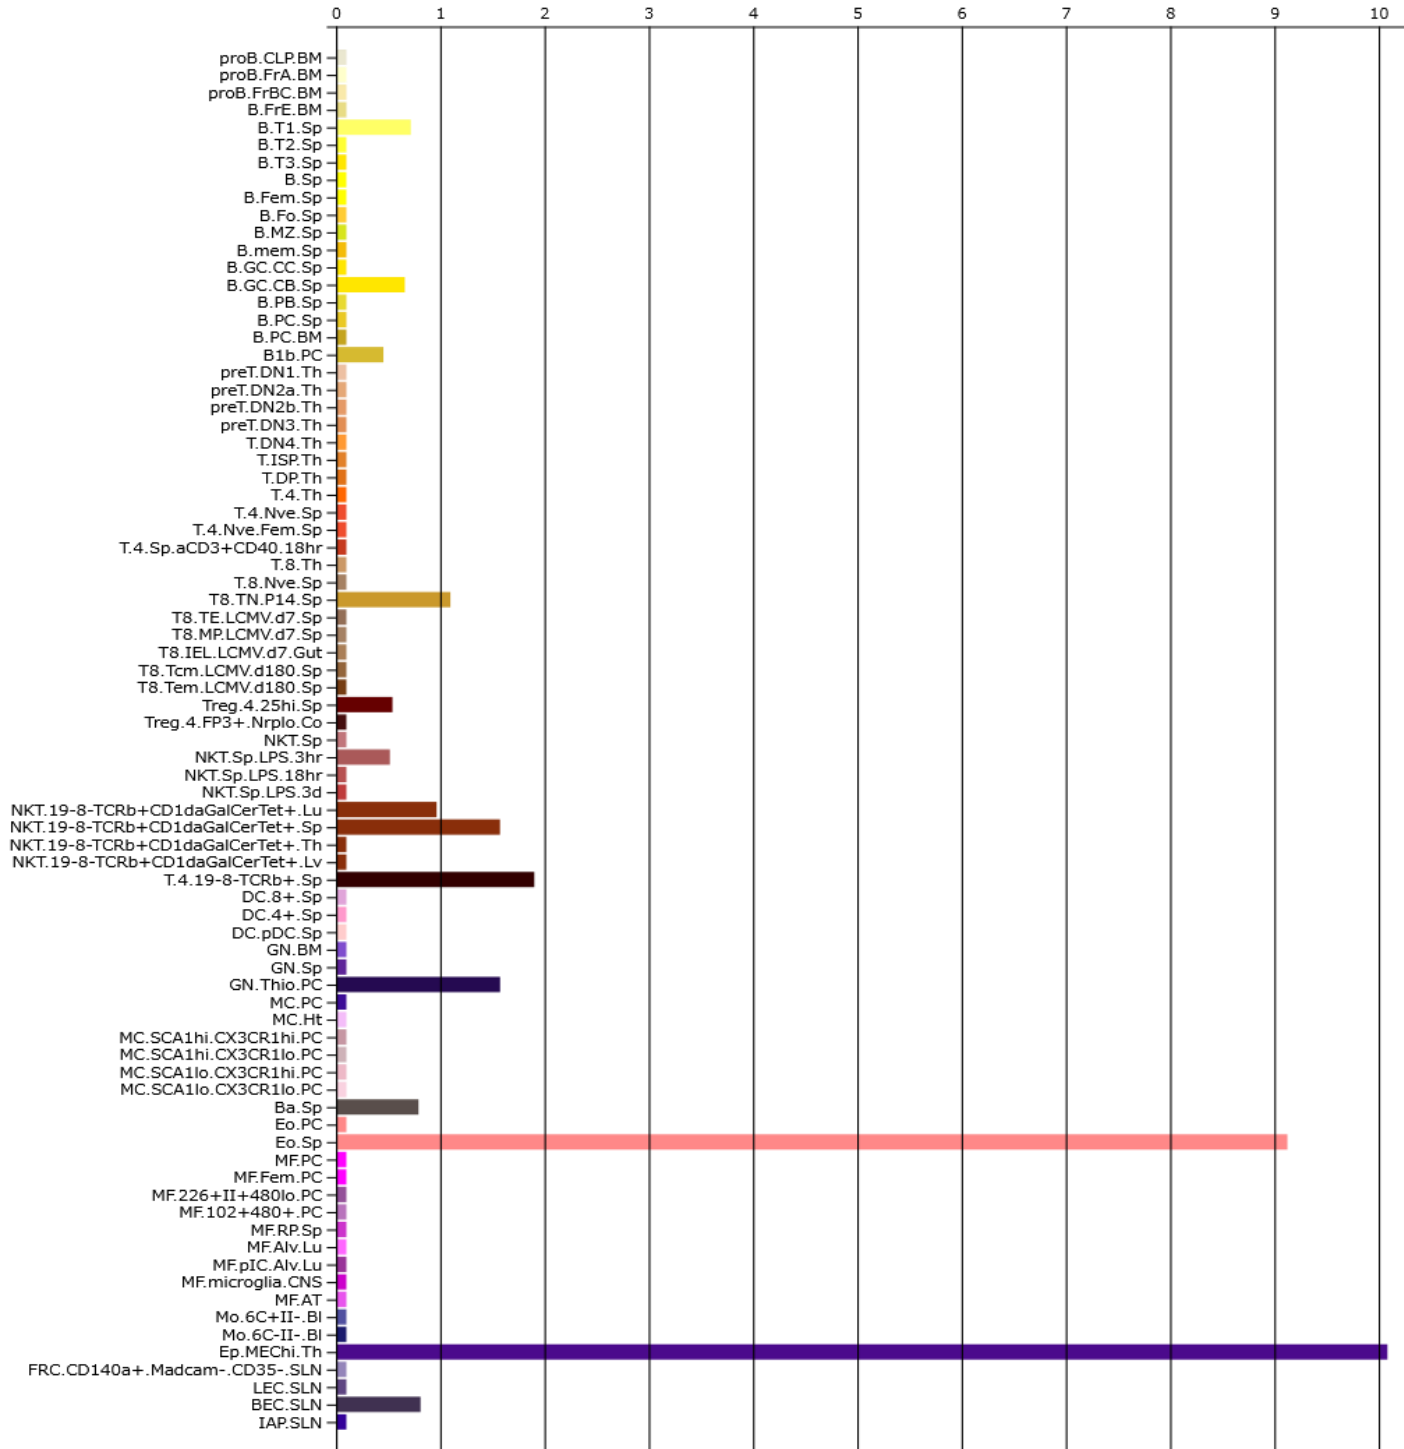

Expression Value Range

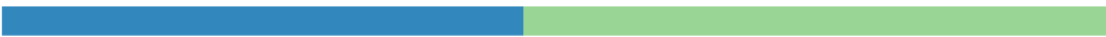

**Gene: Tas2r107**

Expression Value Normalized by DESeq2

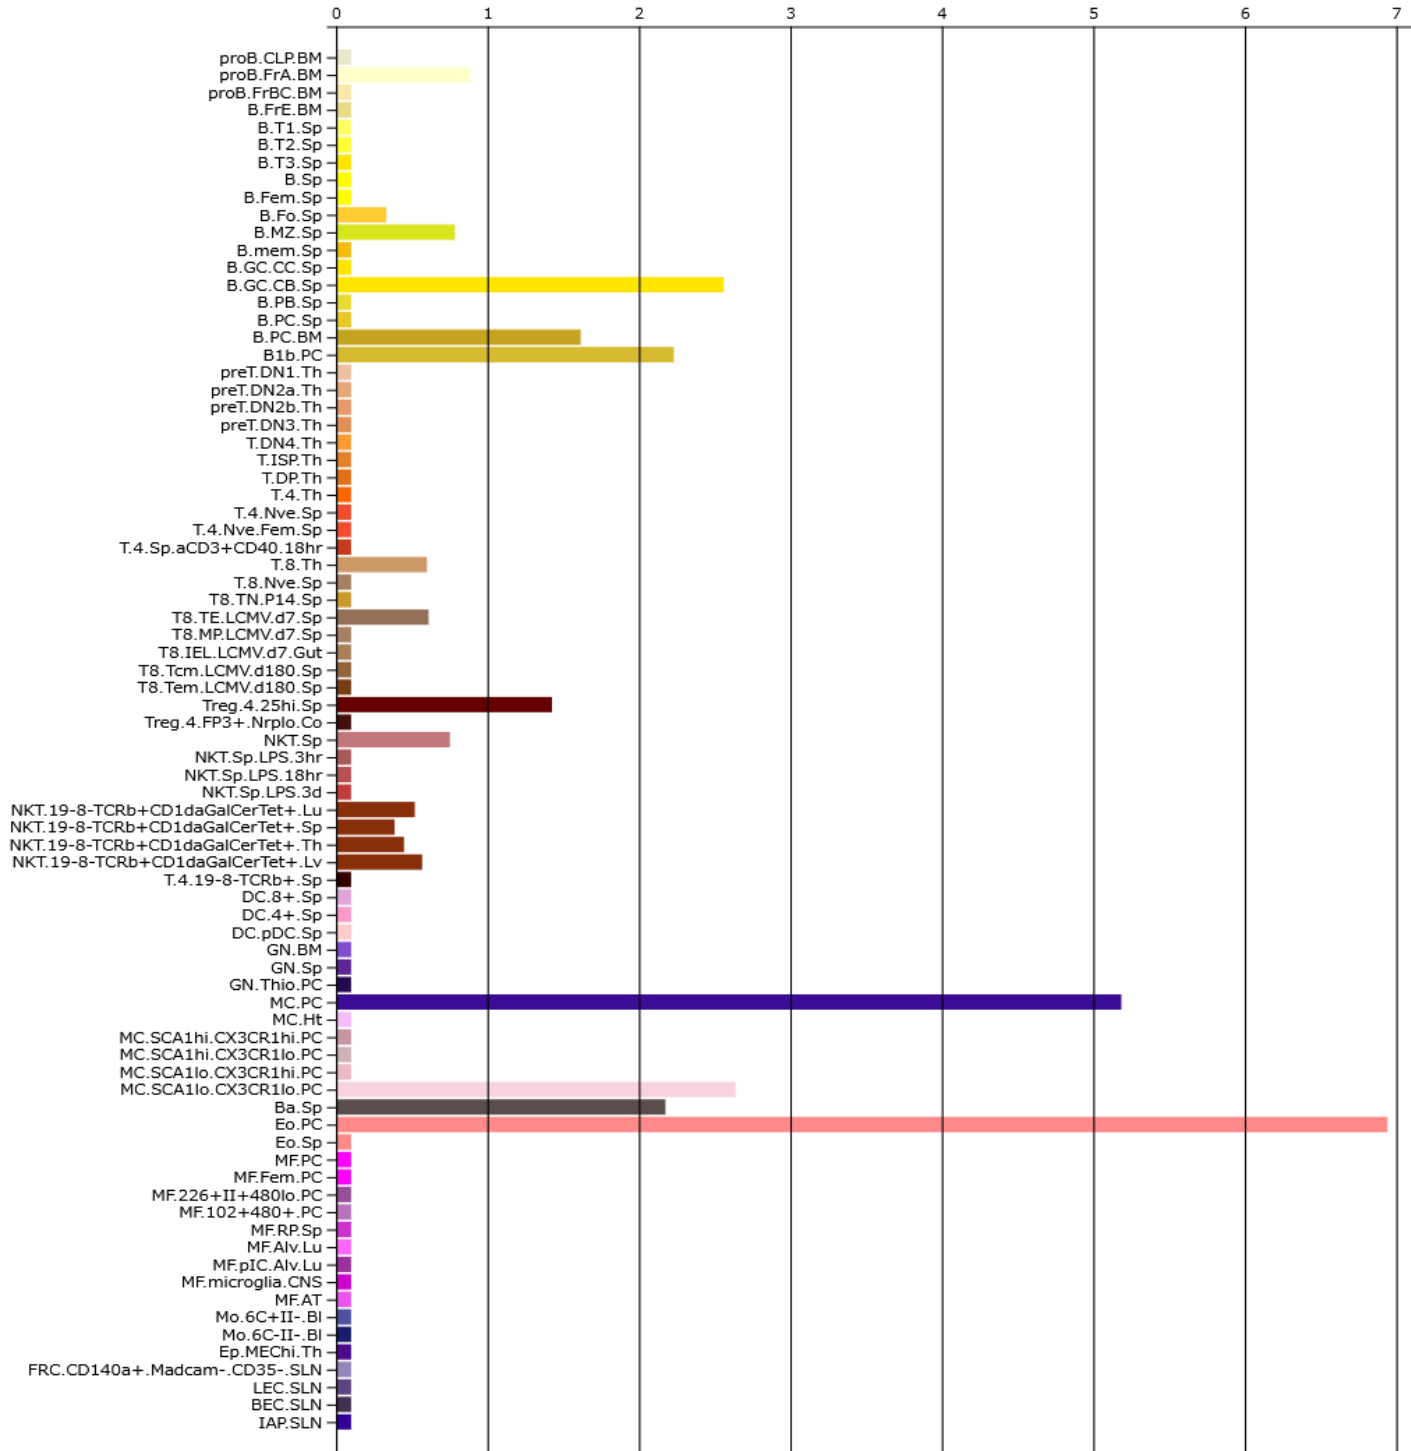

Expression Value Range

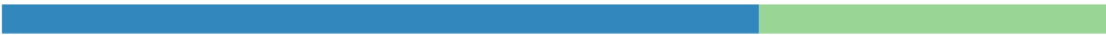

**Gene: Tas2r109**

Expression Value Normalized by DESeq2

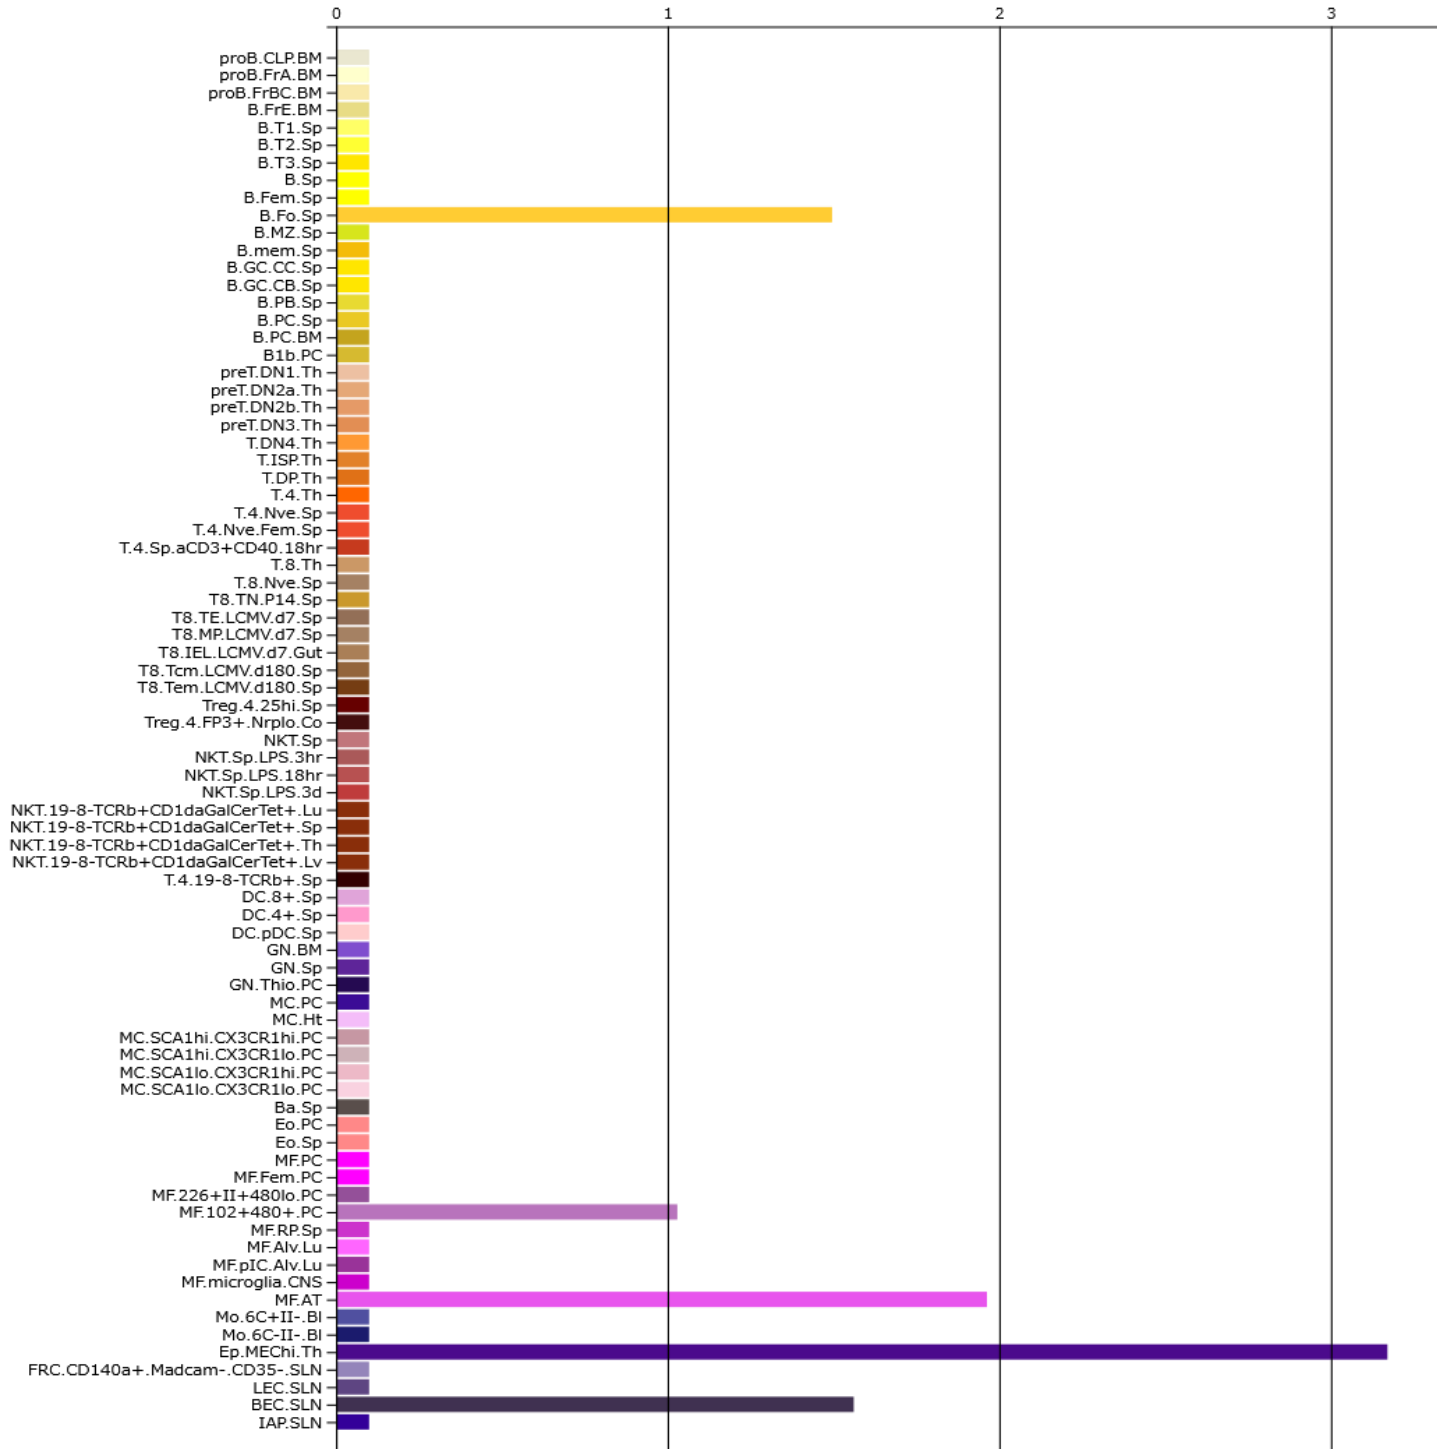

Expression Value Range

Gene: Tas2r110

Expression Value Normalized by DESeq2

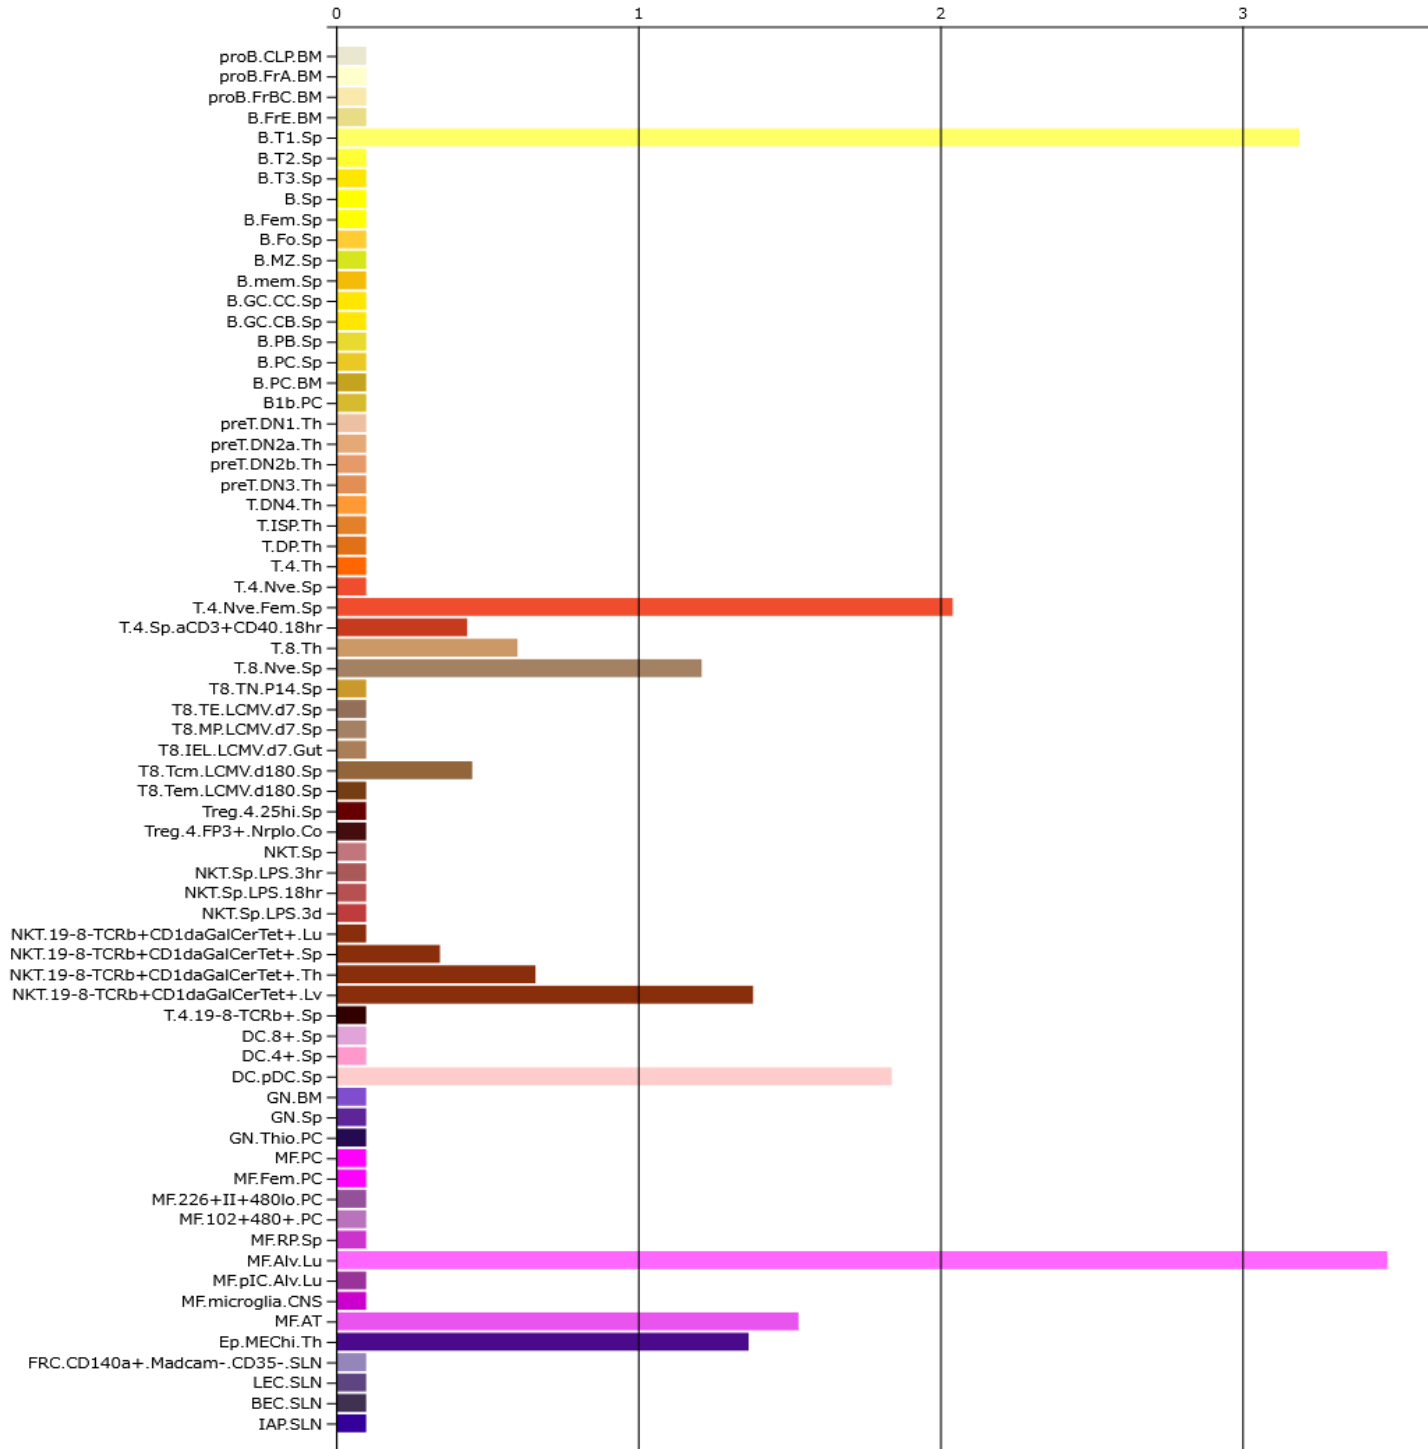

Expression Value Range

Gene: Tas2r111-ps2

Expression Value Normalized by DESeq2

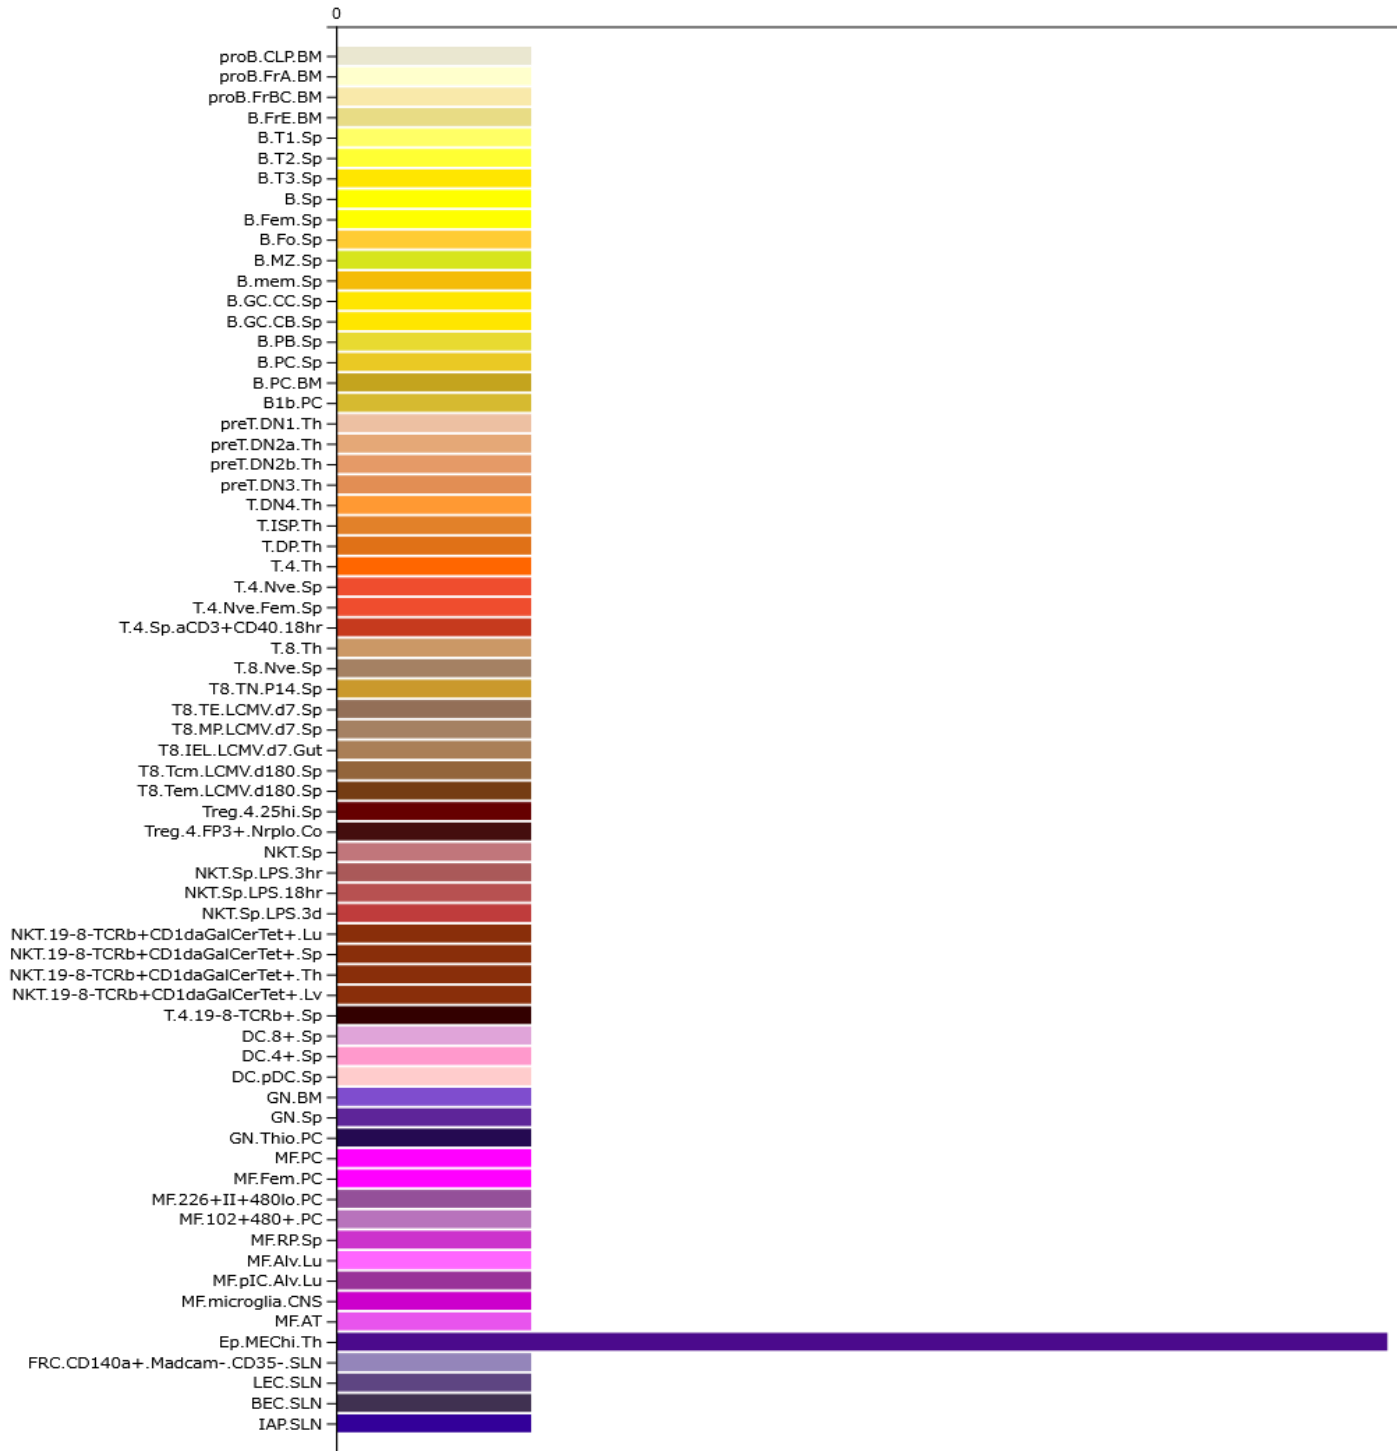

Expression Value Range



**Gene: Tas2r113**

Expression Value Normalized by DESeq2

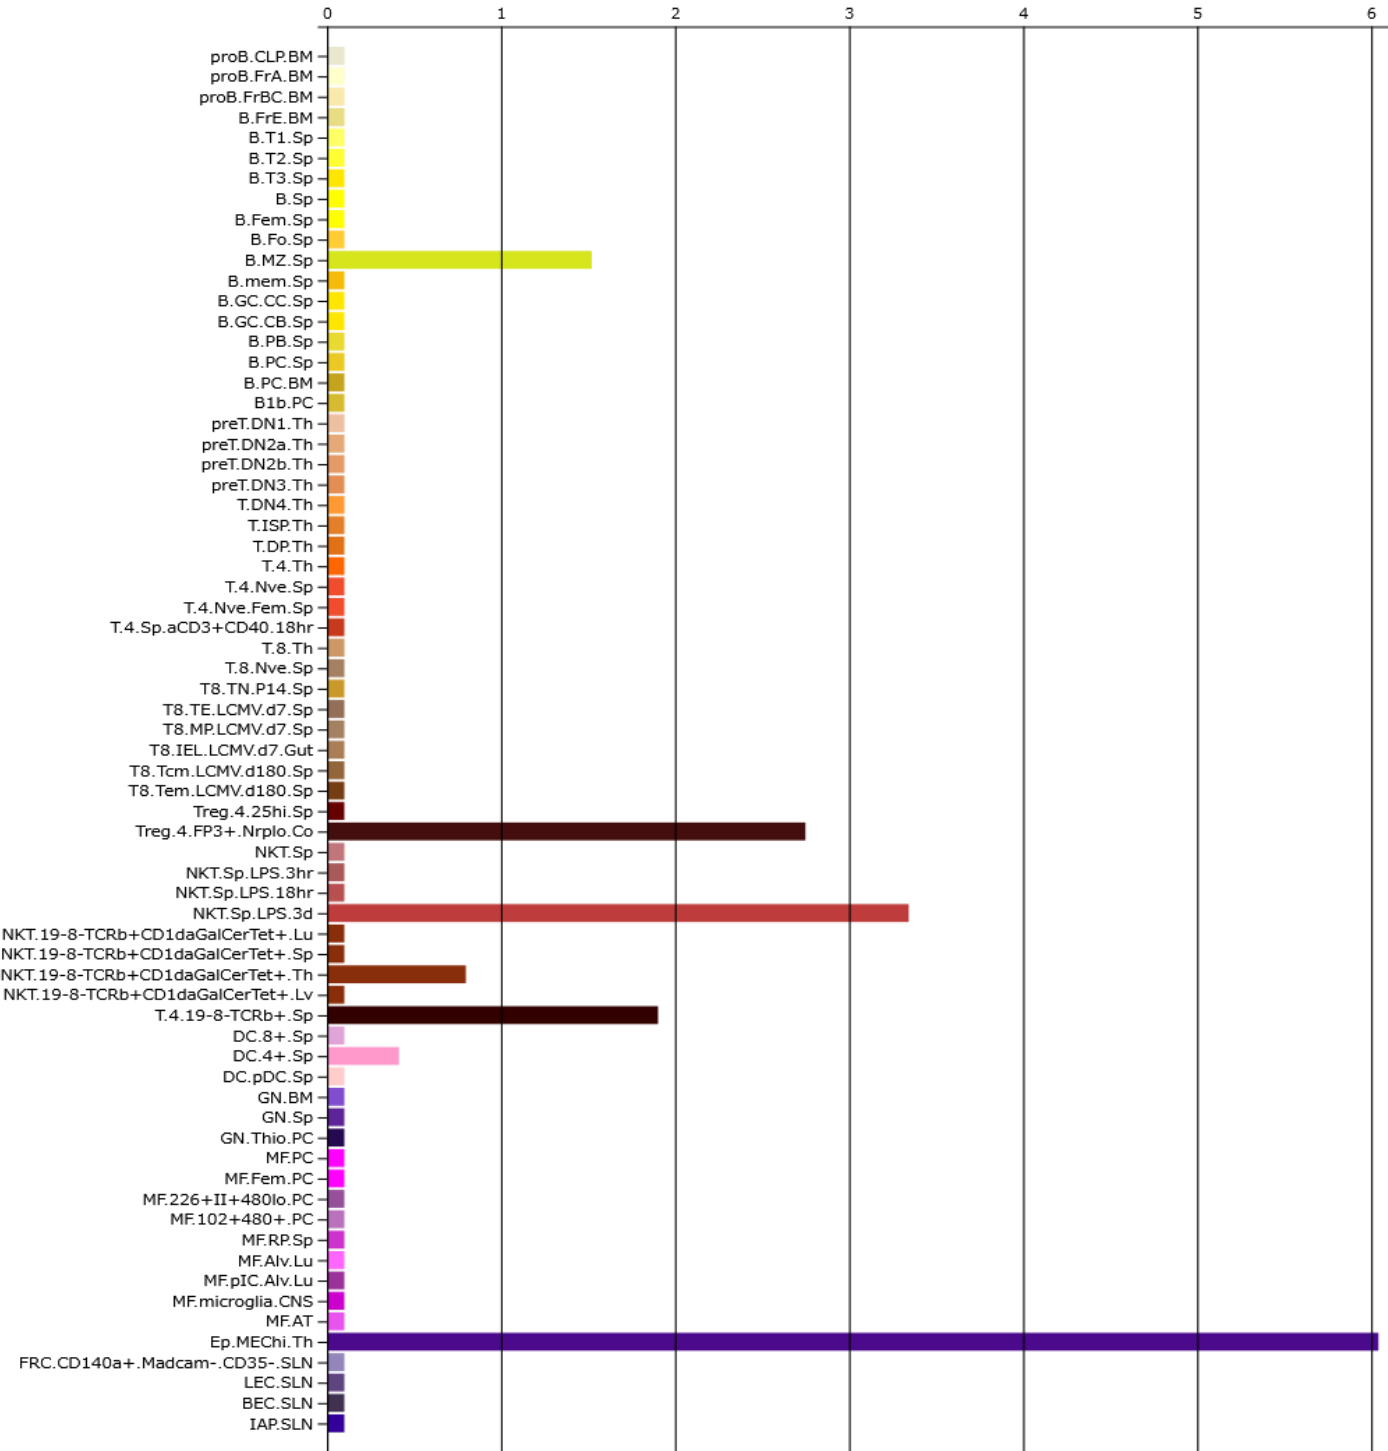

Expression Value Range

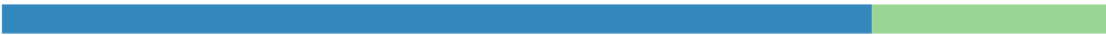

**Gene: Tas2r114**

Expression Value Normalized by DESeq2

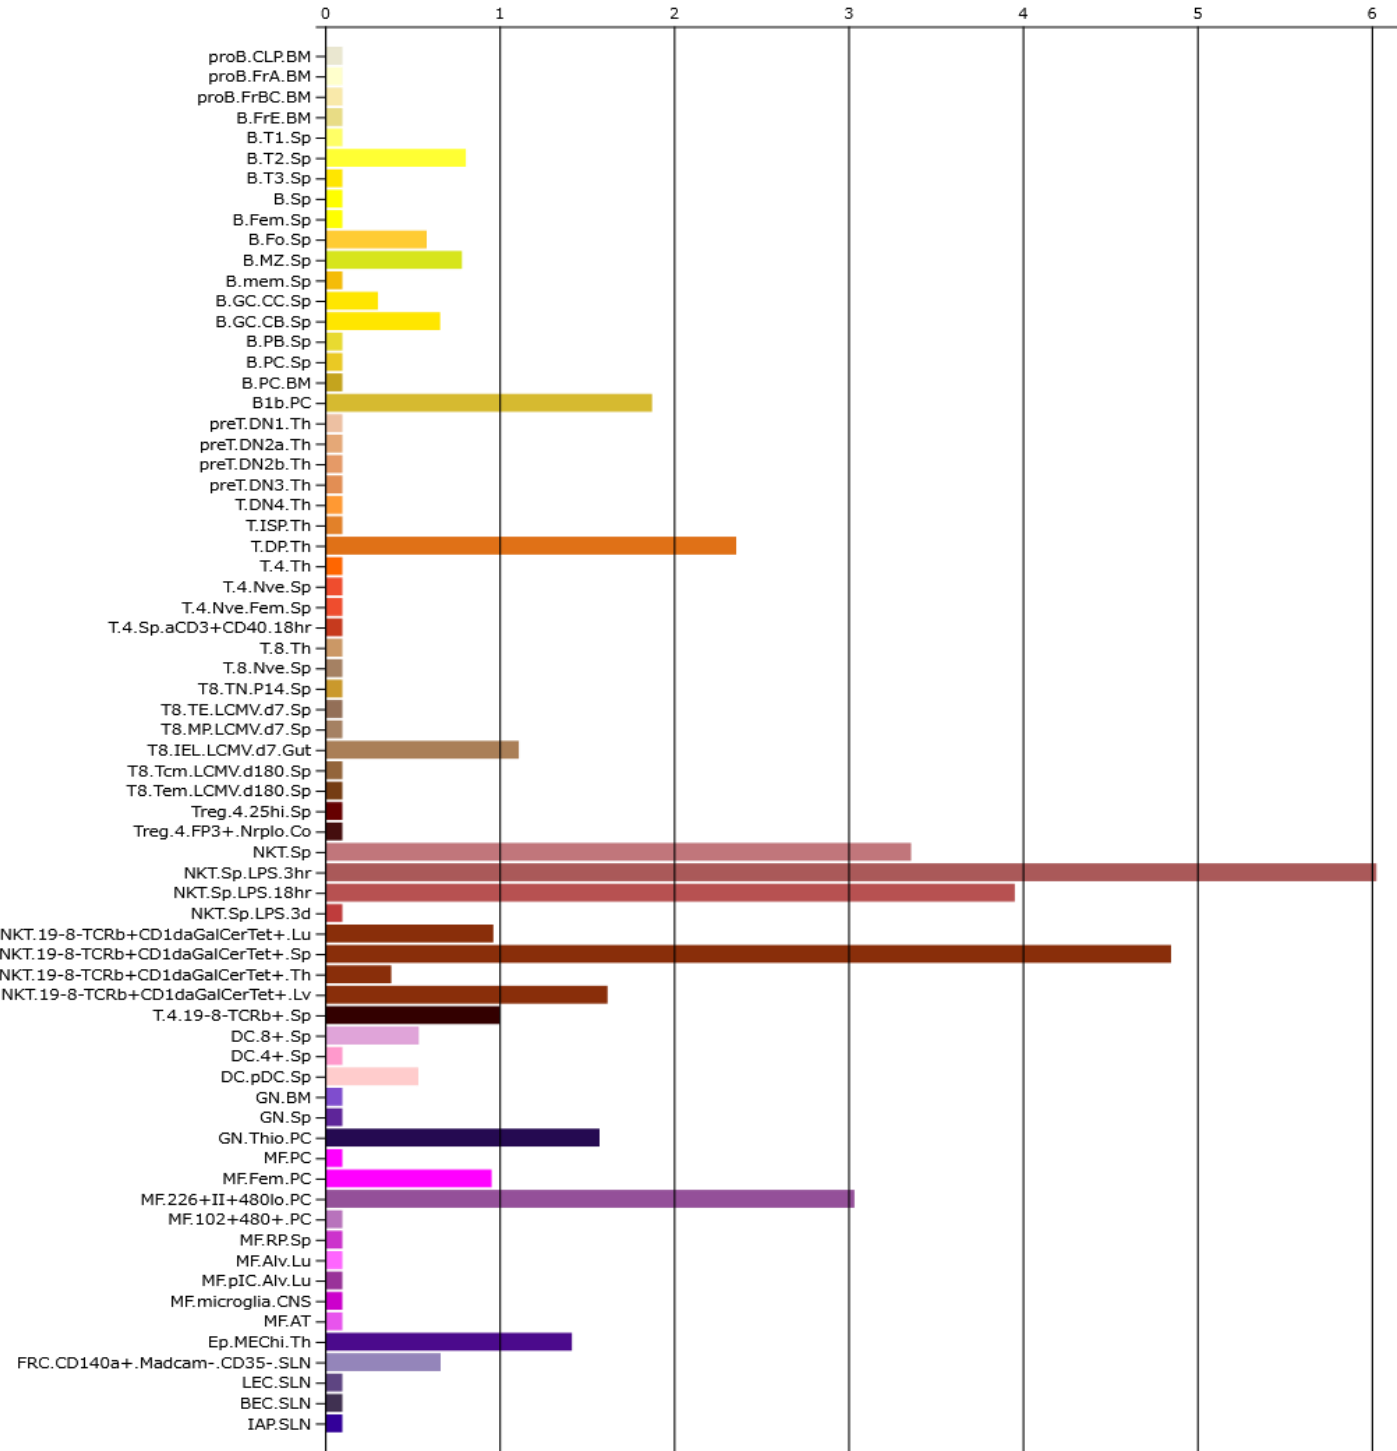

Expression Value Range

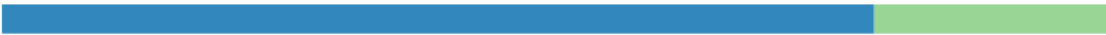

**Gene: Tas2r115**

Expression Value Normalized by DESeq2

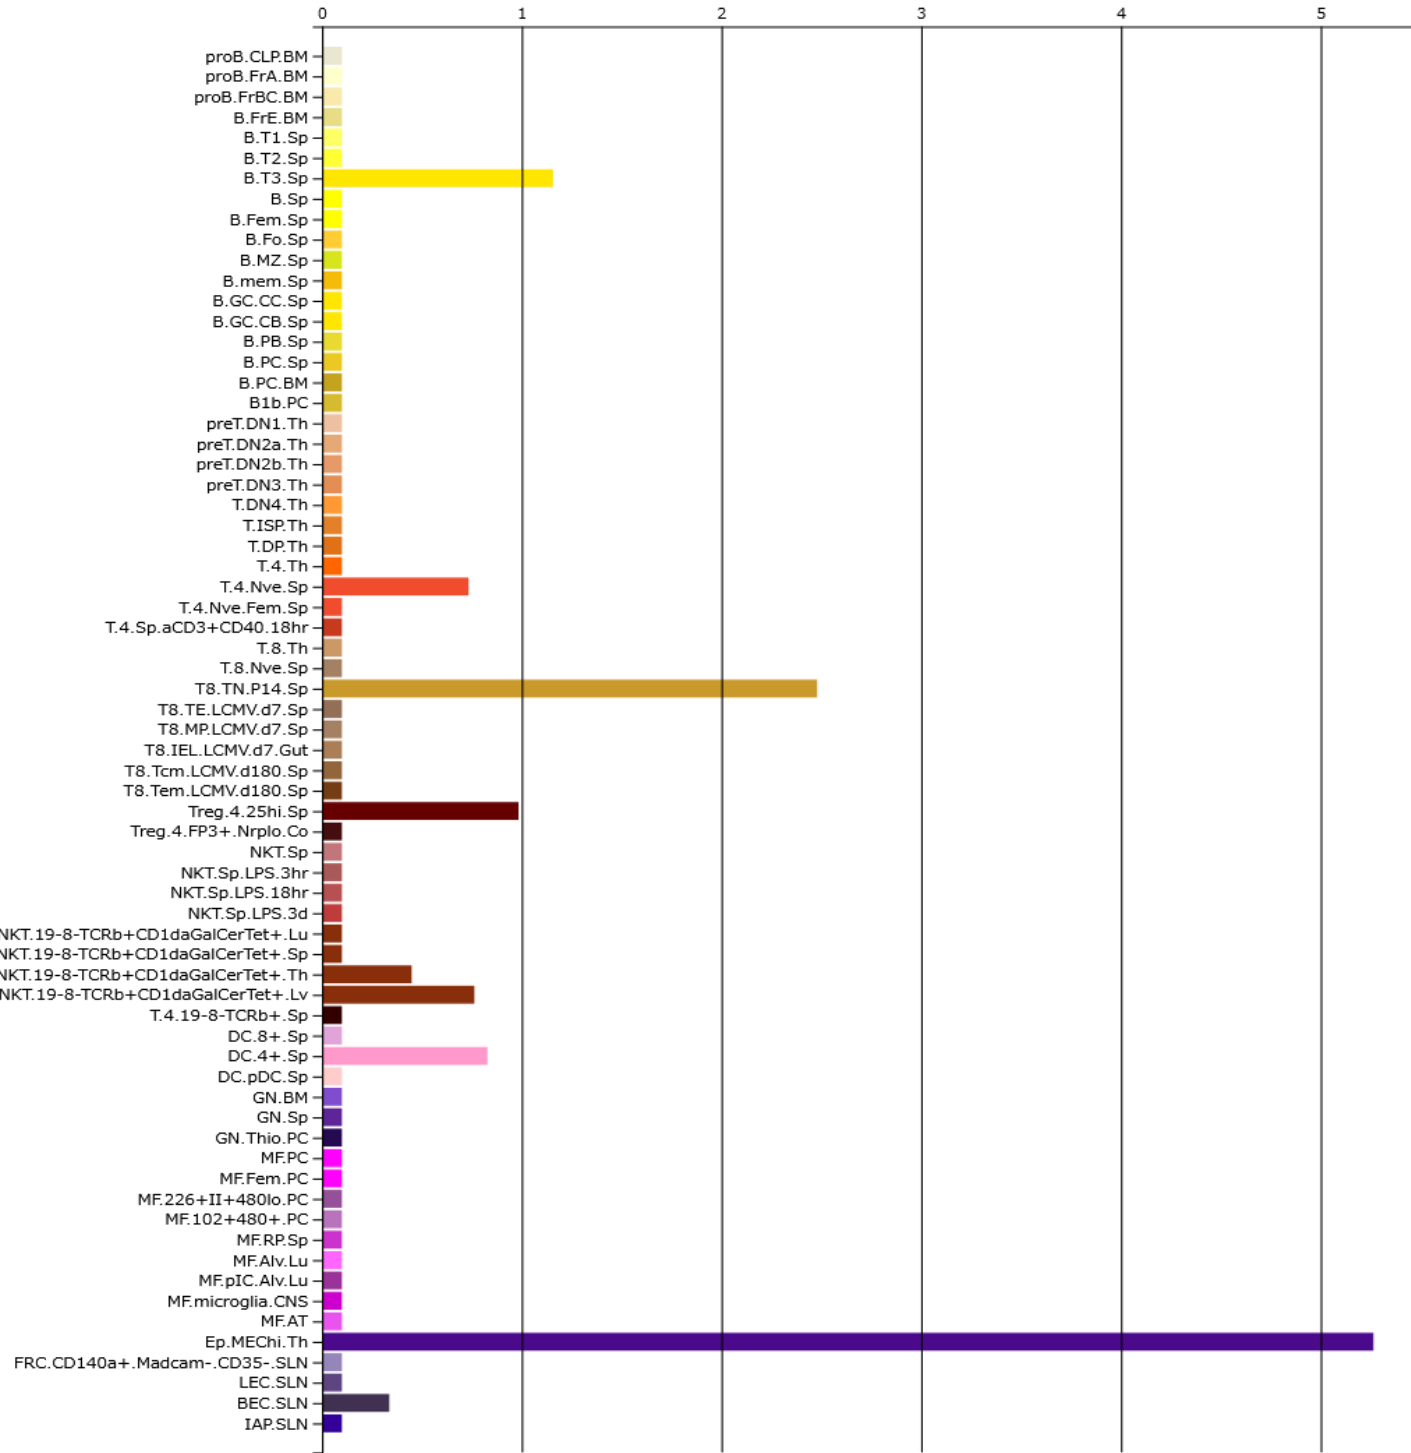

Expression Value Range

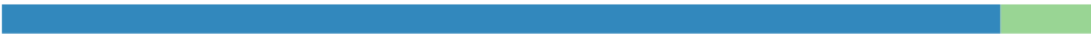

**Gene: Tas2r116**

Expression Value Normalized by DESeq2

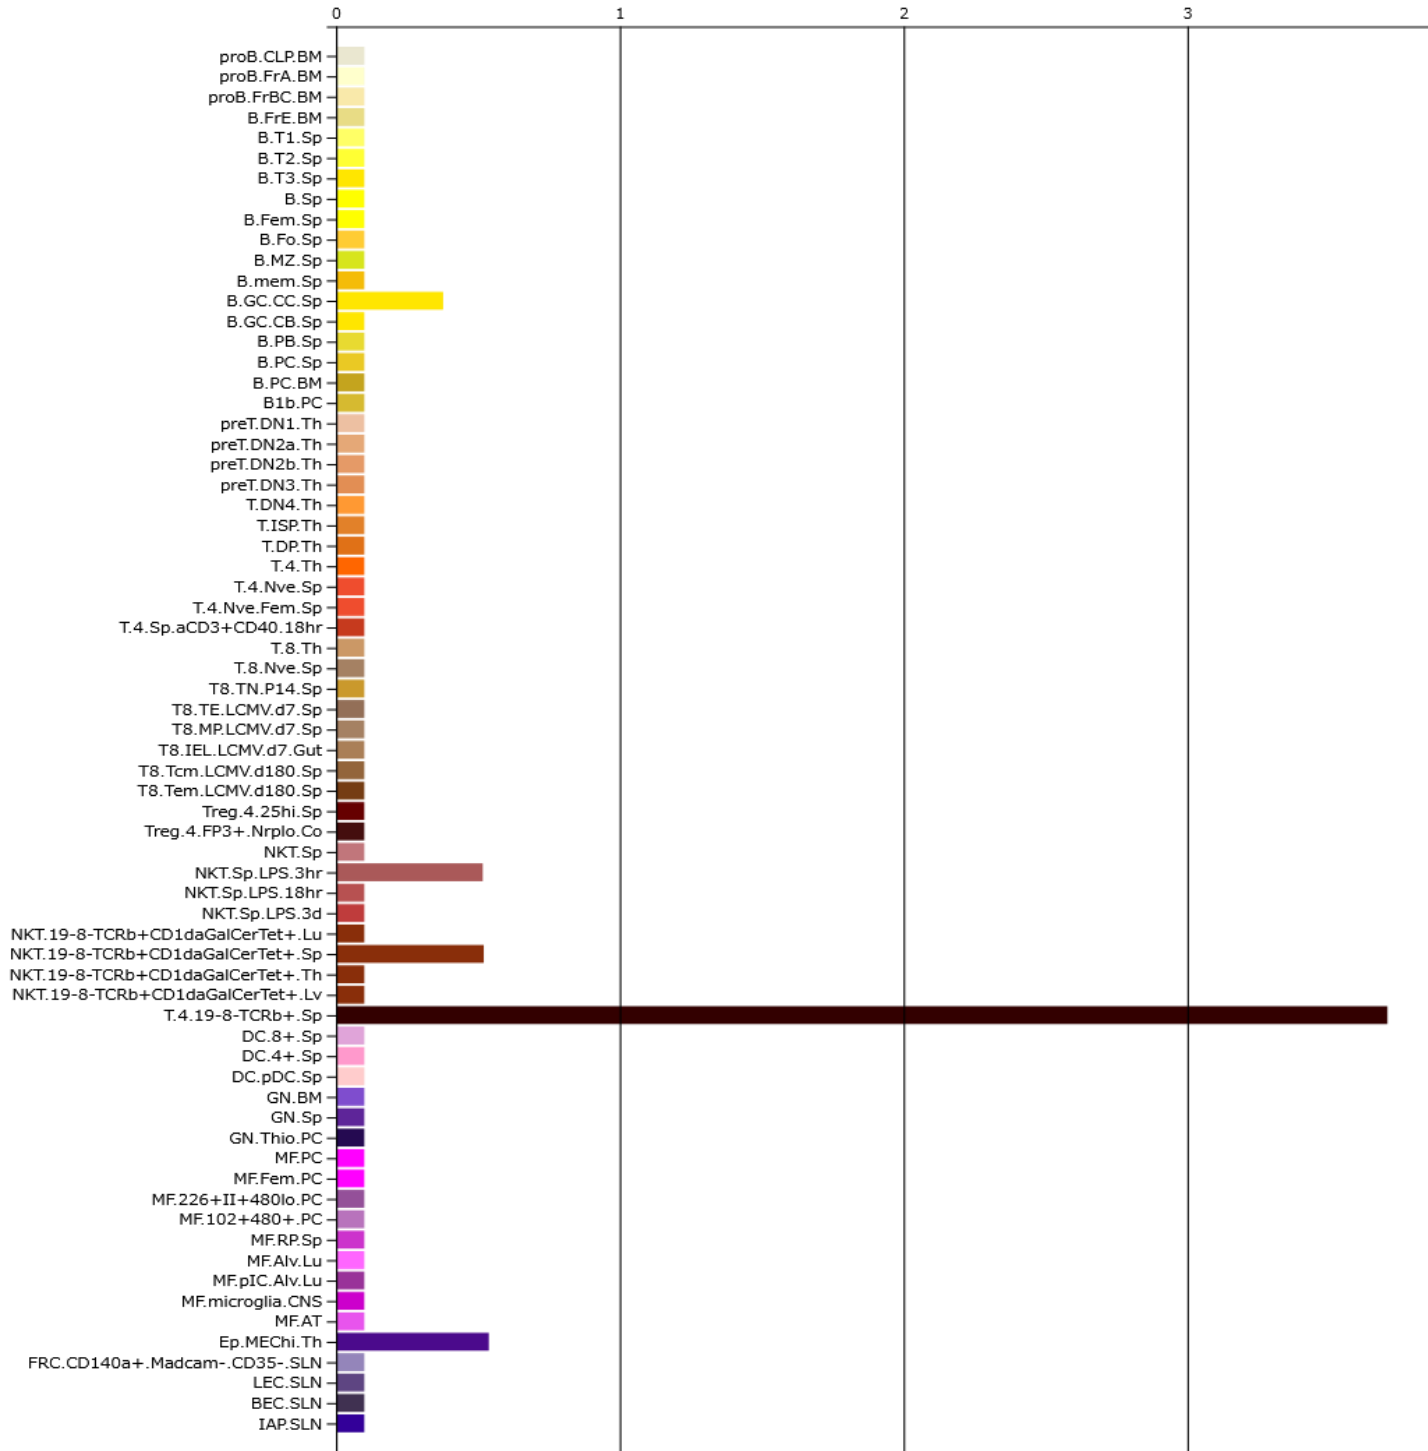

Expression Value Range

**Gene: Tas2r117**

Expression Value Normalized by DESeq2

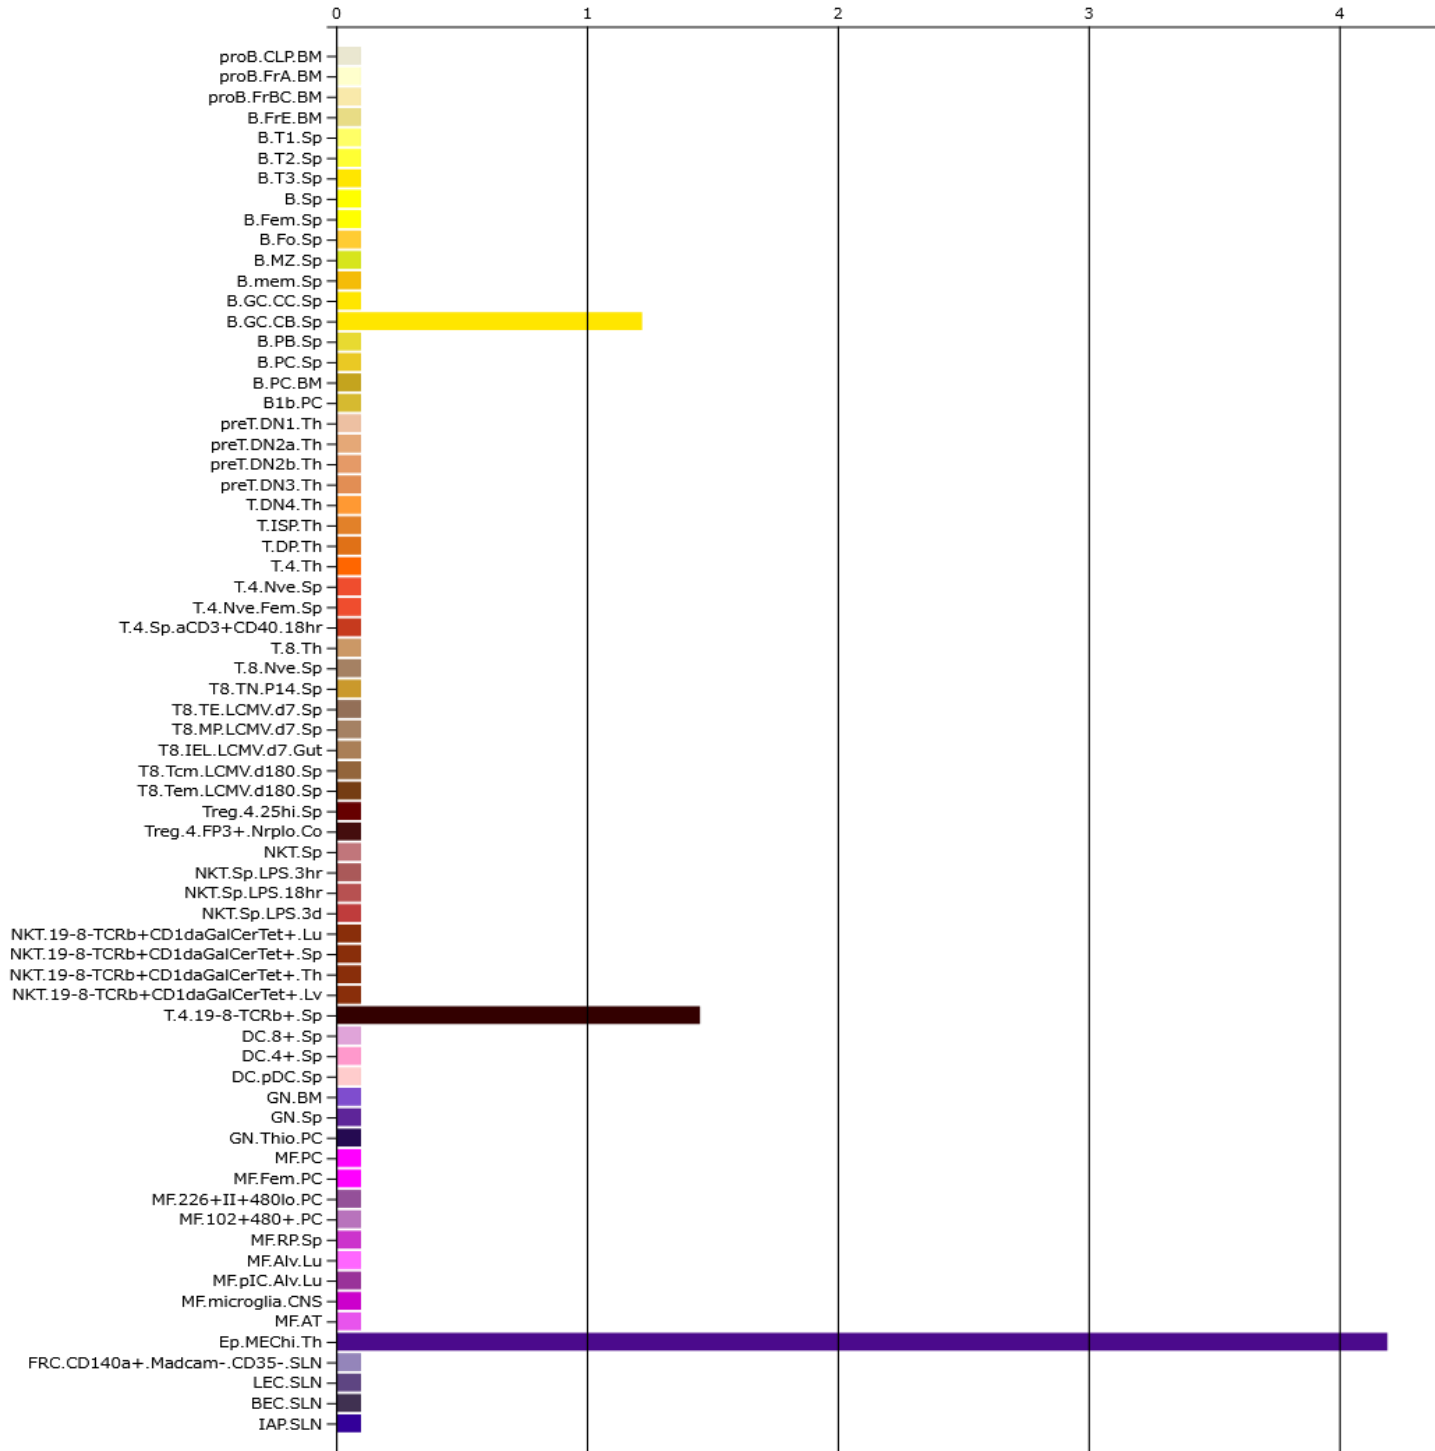

Expression Value Range

**Gene: Tas2r118**

Expression Value Normalized by DESeq2

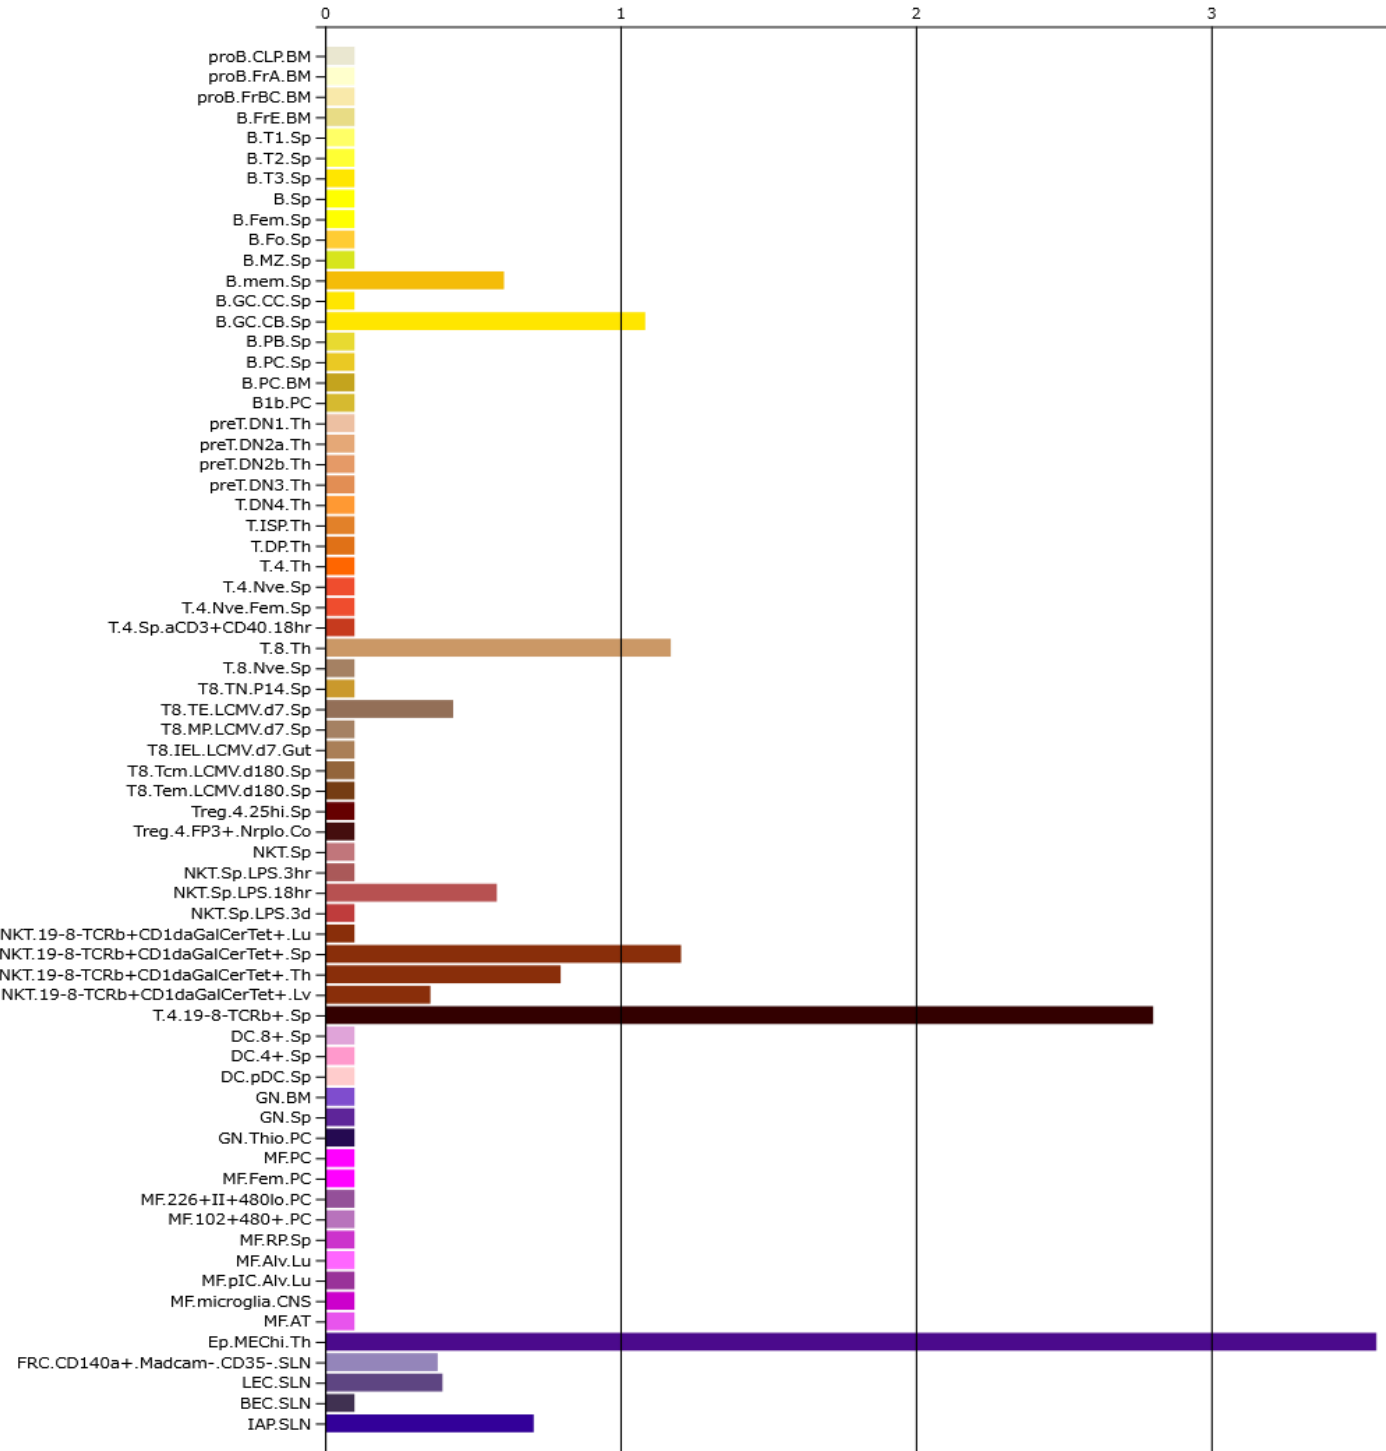

Expression Value Range

**Gene: Tas2r120**

Expression Value Normalized by DESeq2

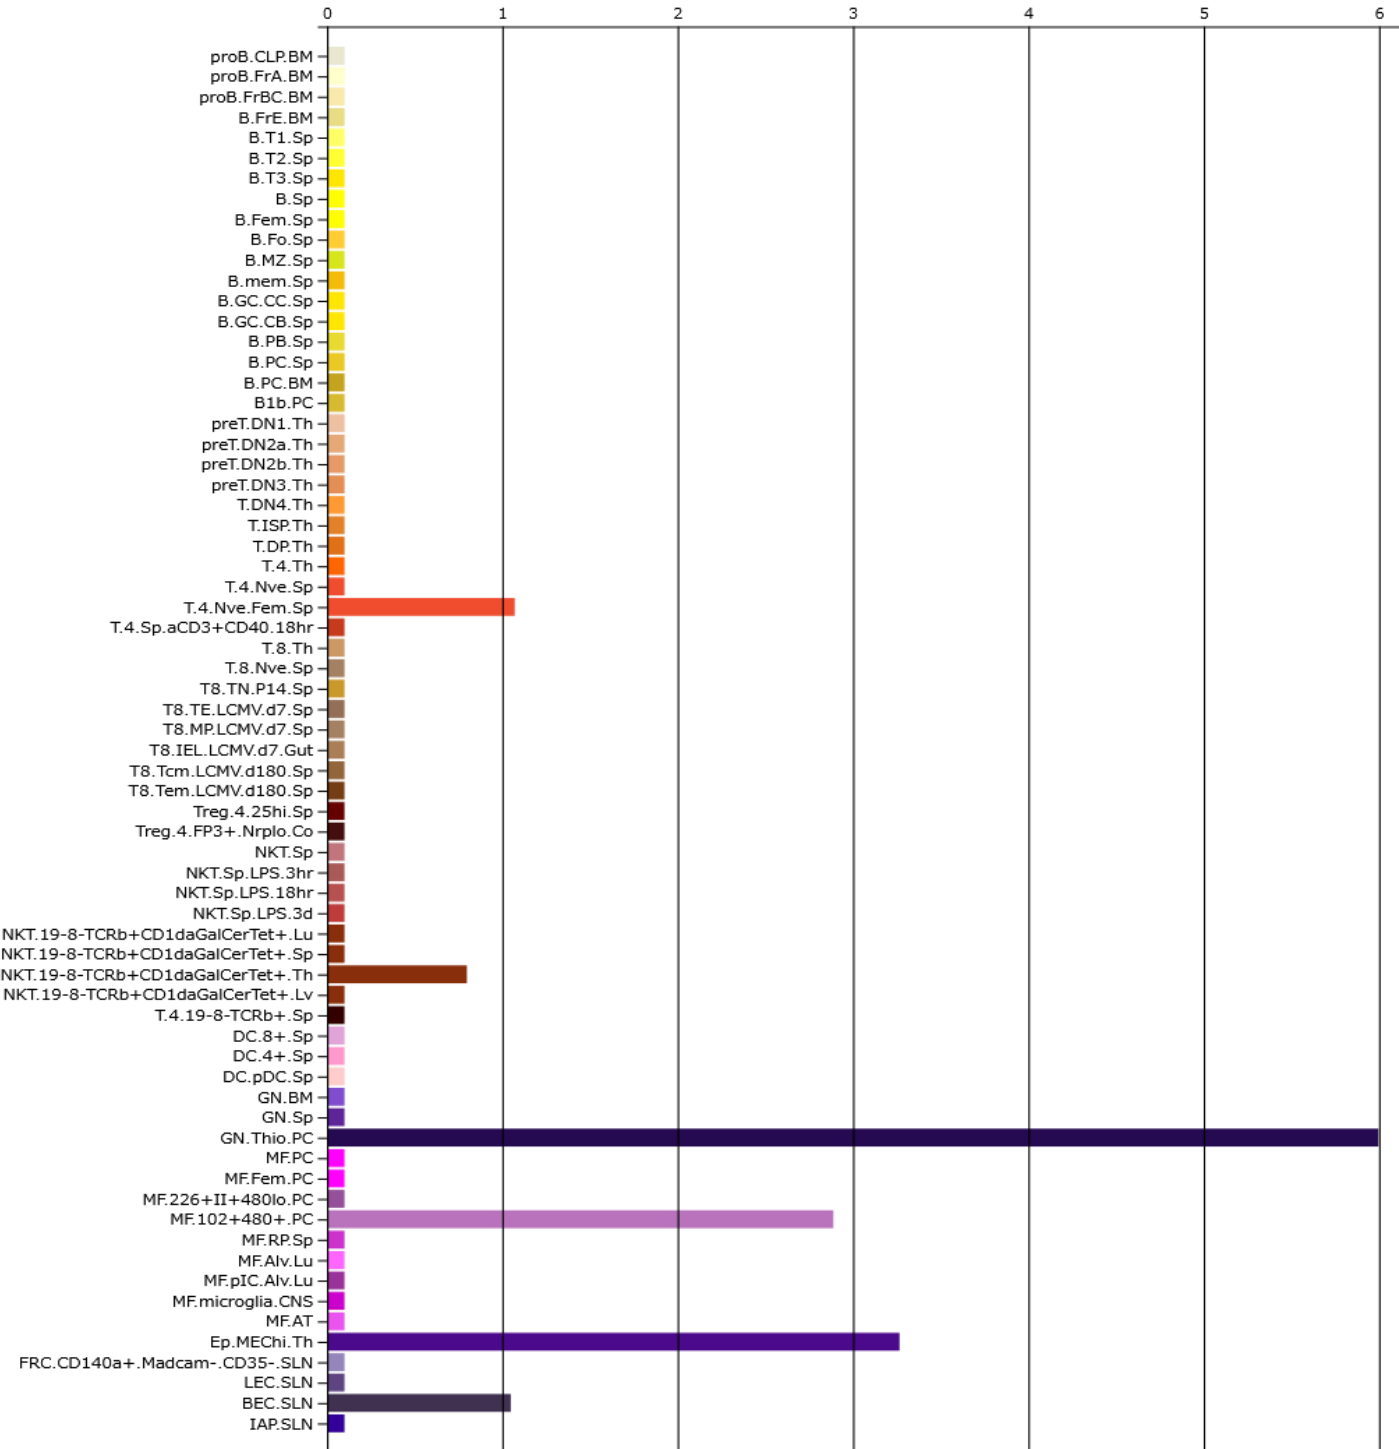

Expression Value Range

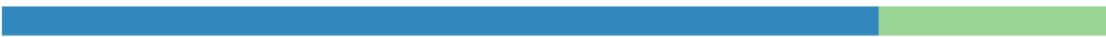

**Gene: Tas2r121**

Expression Value Normalized by DESeq2

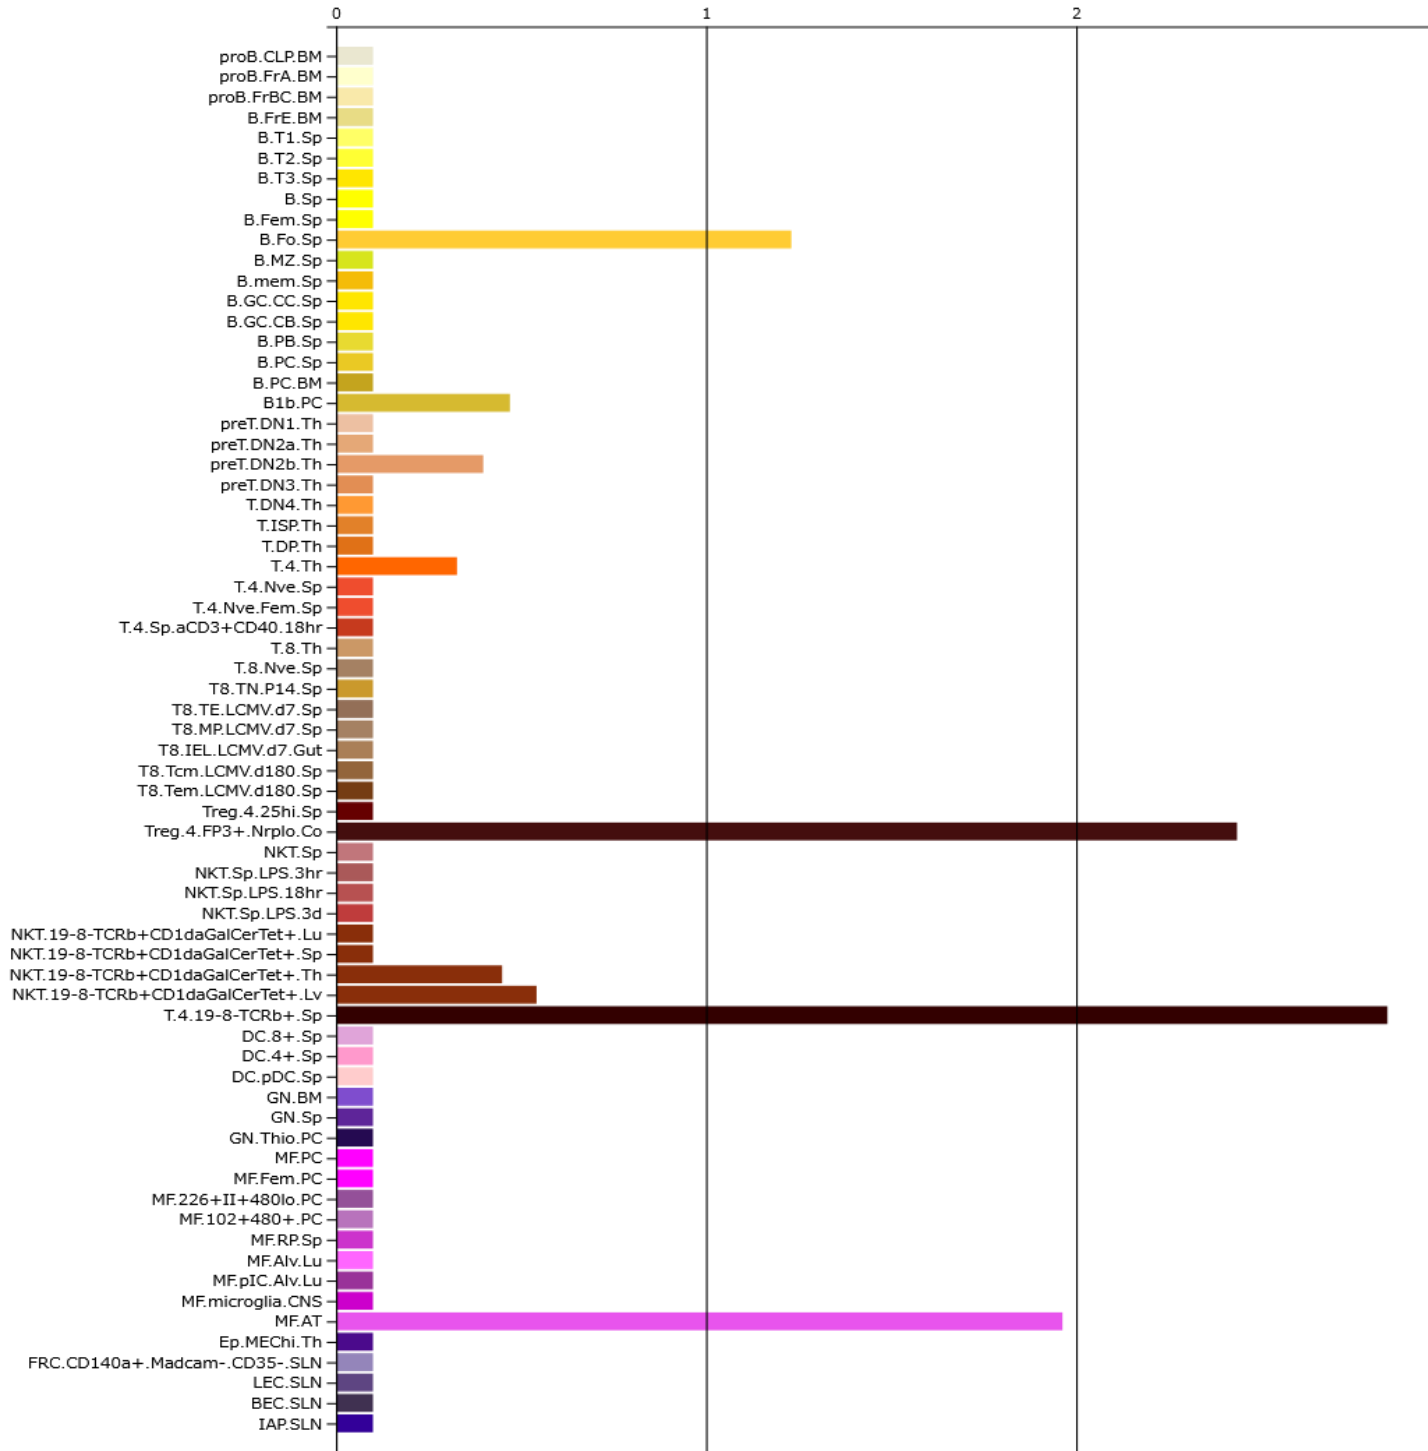

Expression Value Range



Gene: Tas2r122

Expression Value Normalized by DESeq2

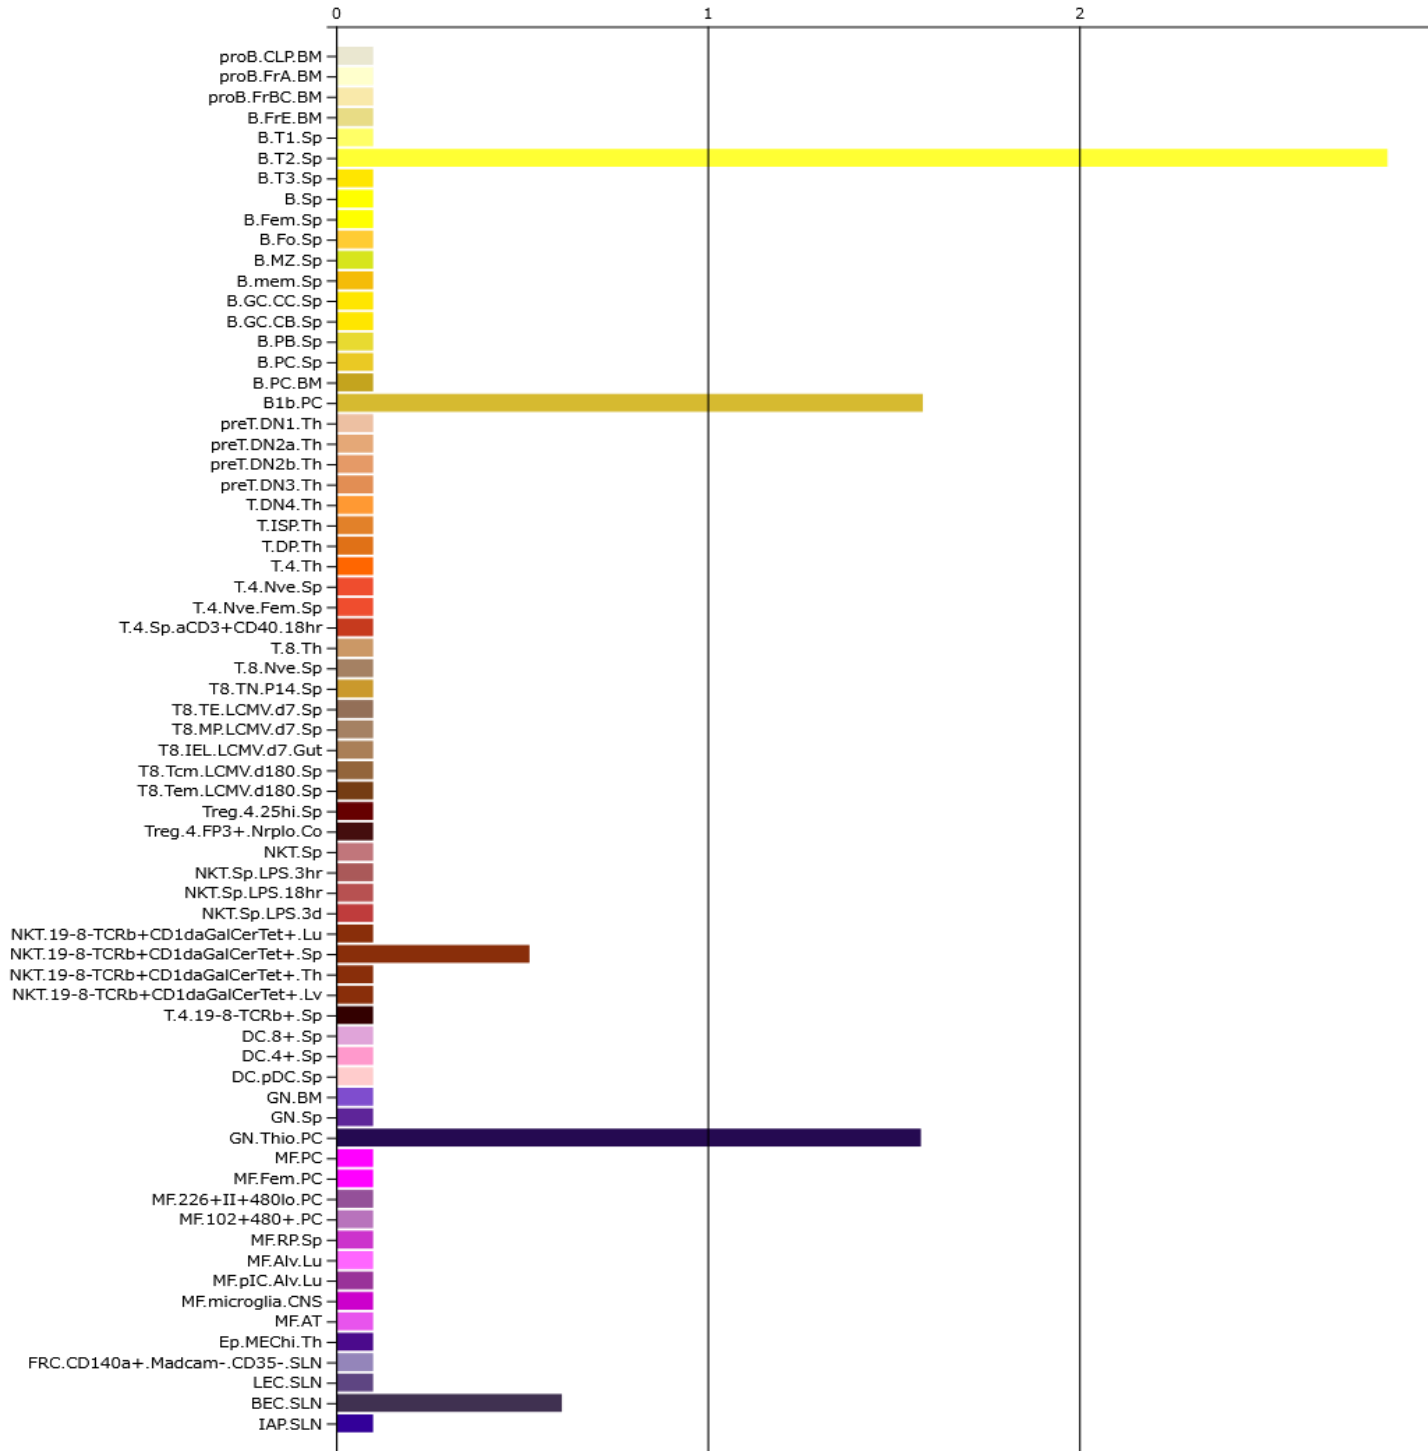

Expression Value Range

**Gene: Tas2r123**

Expression Value Normalized by DESeq2

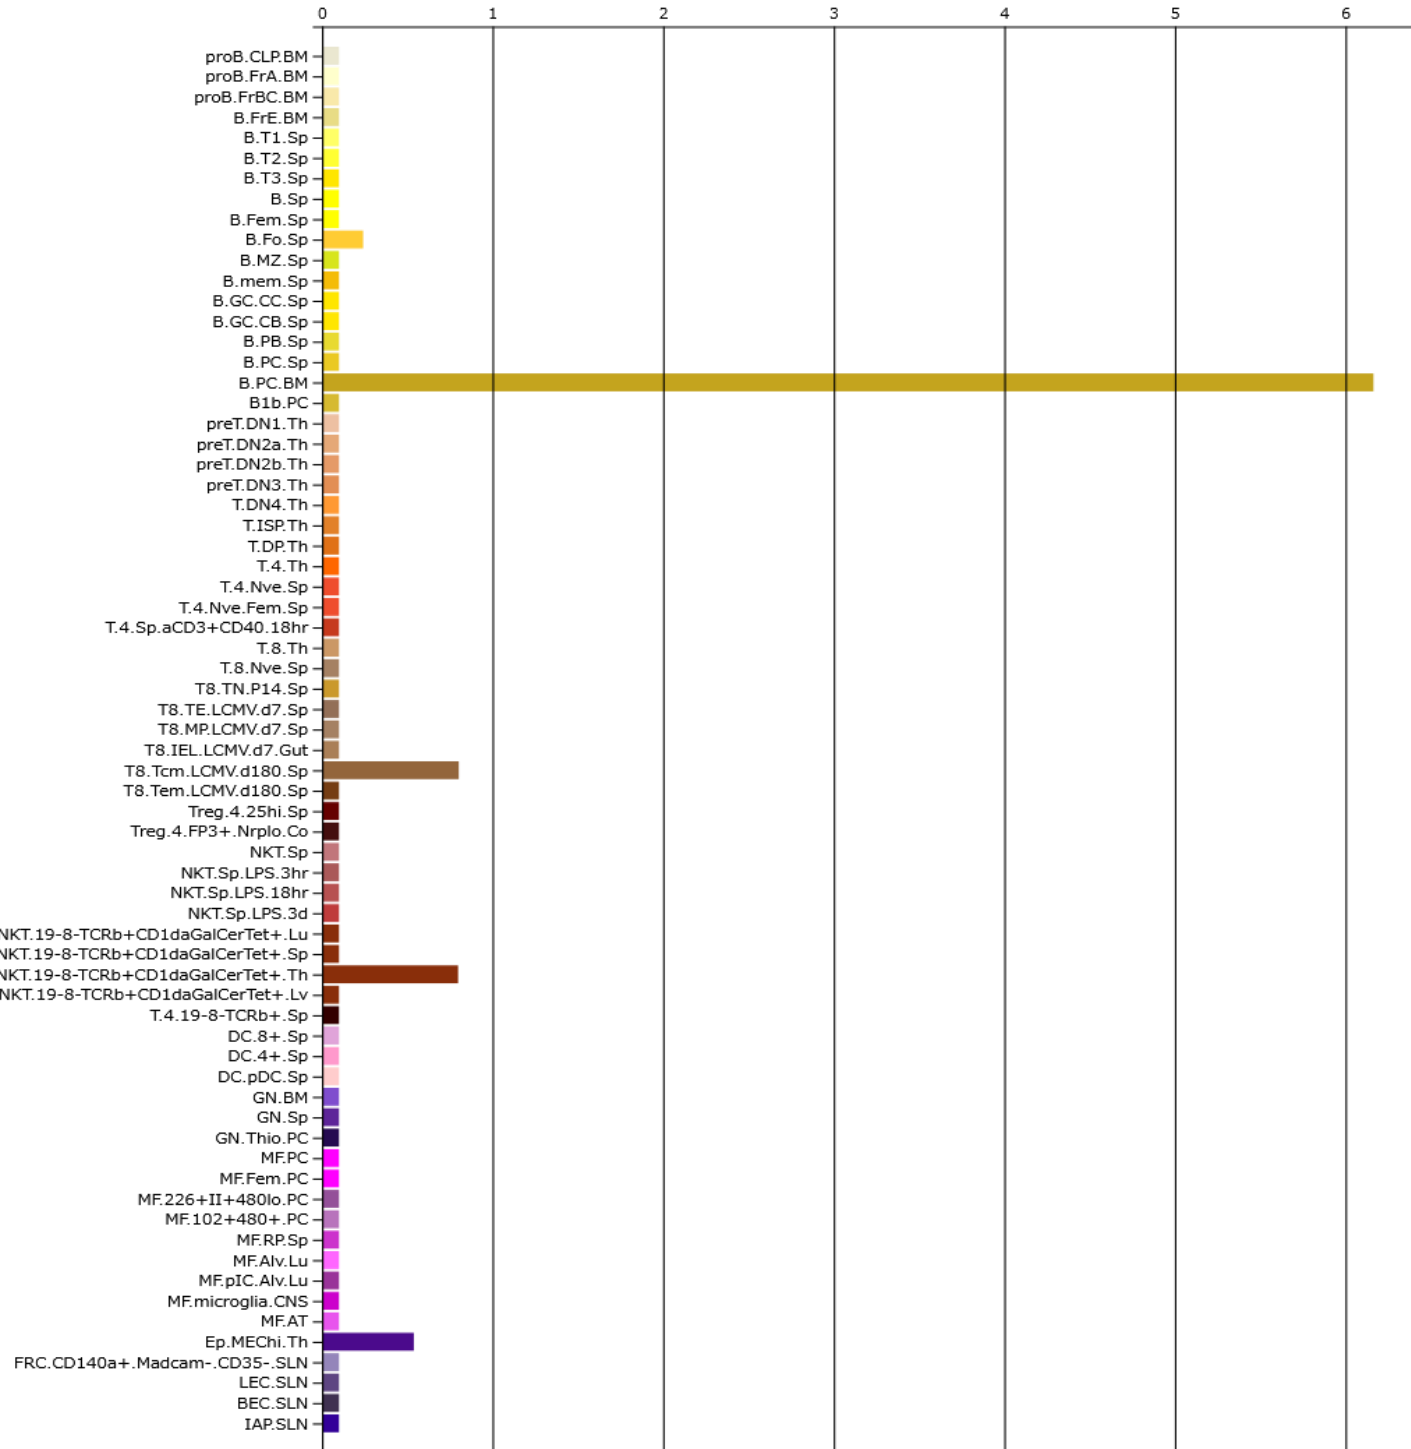

Expression Value Range

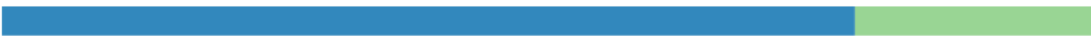

Gene: Tas2r124

Expression Value Normalized by DESeq2

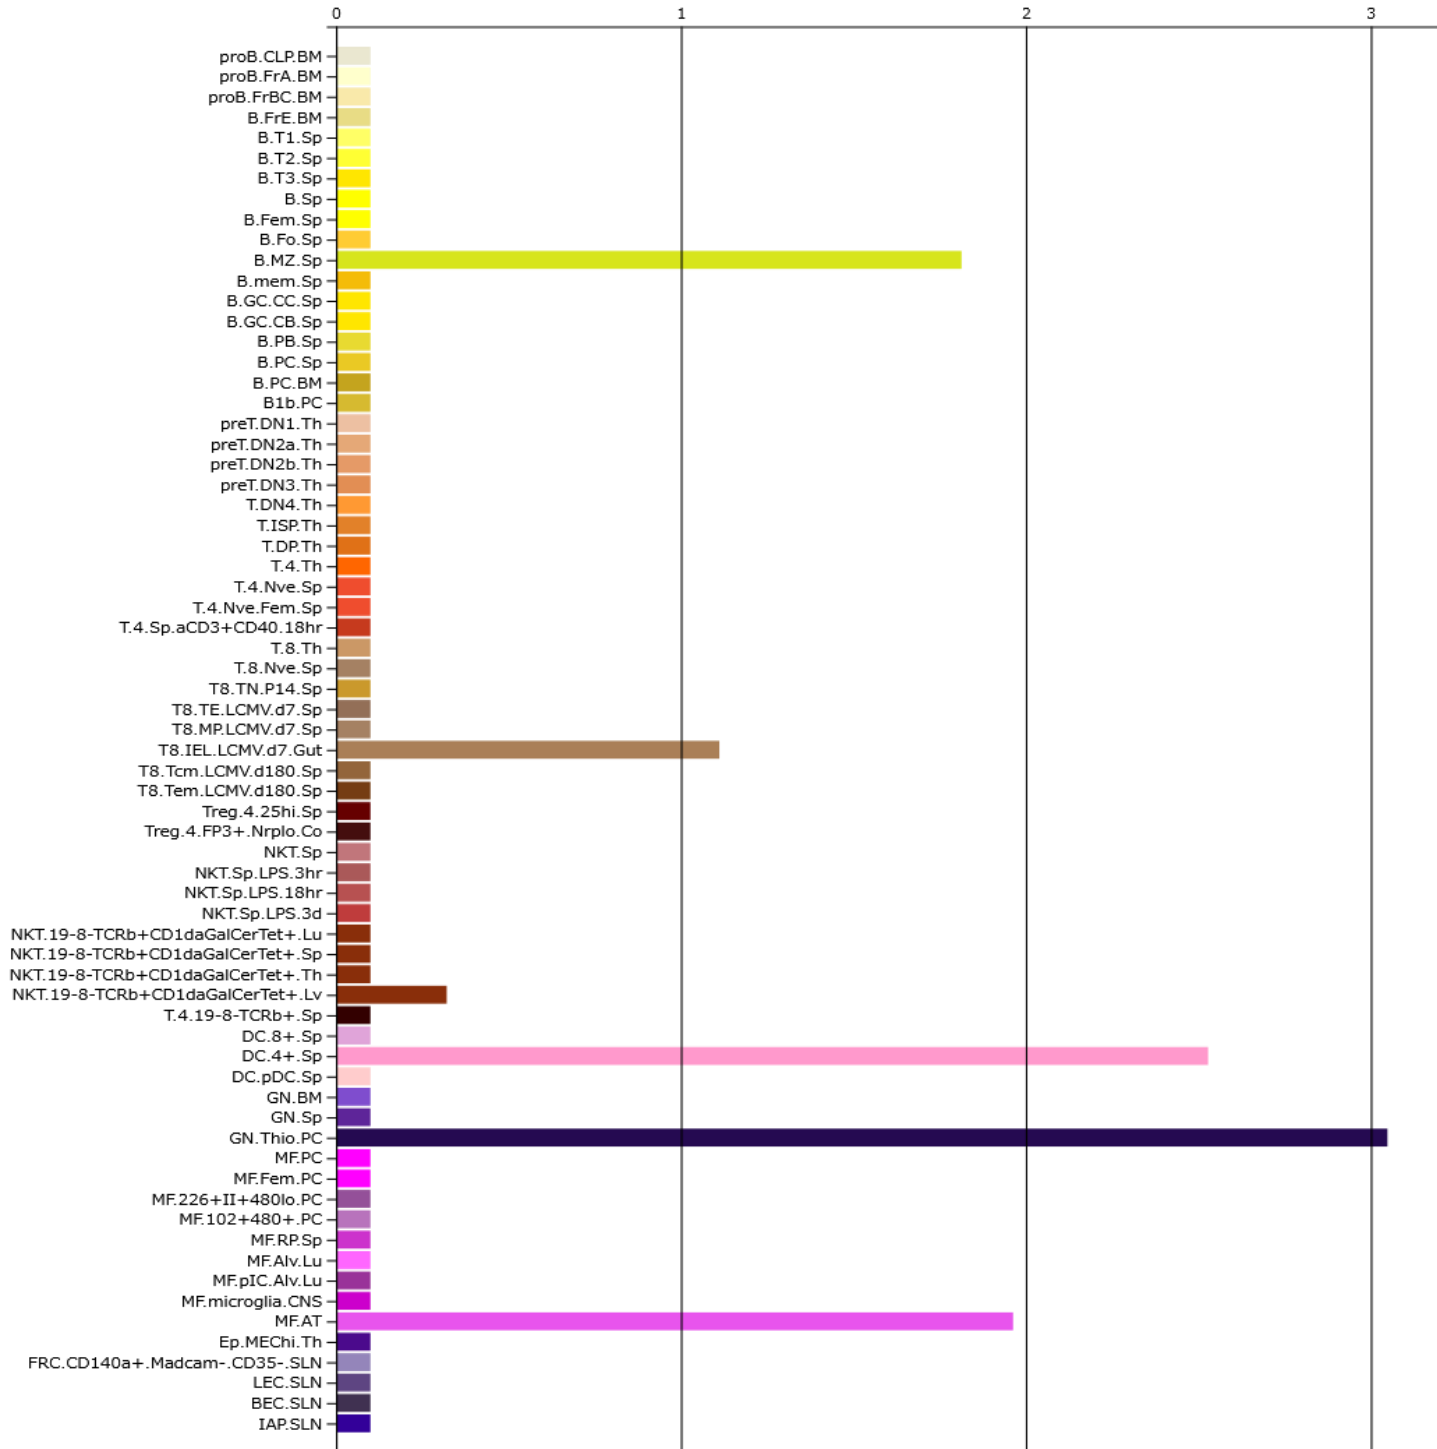

Expression Value Range

Gene: Tas2r125

Expression Value Normalized by DESeq2

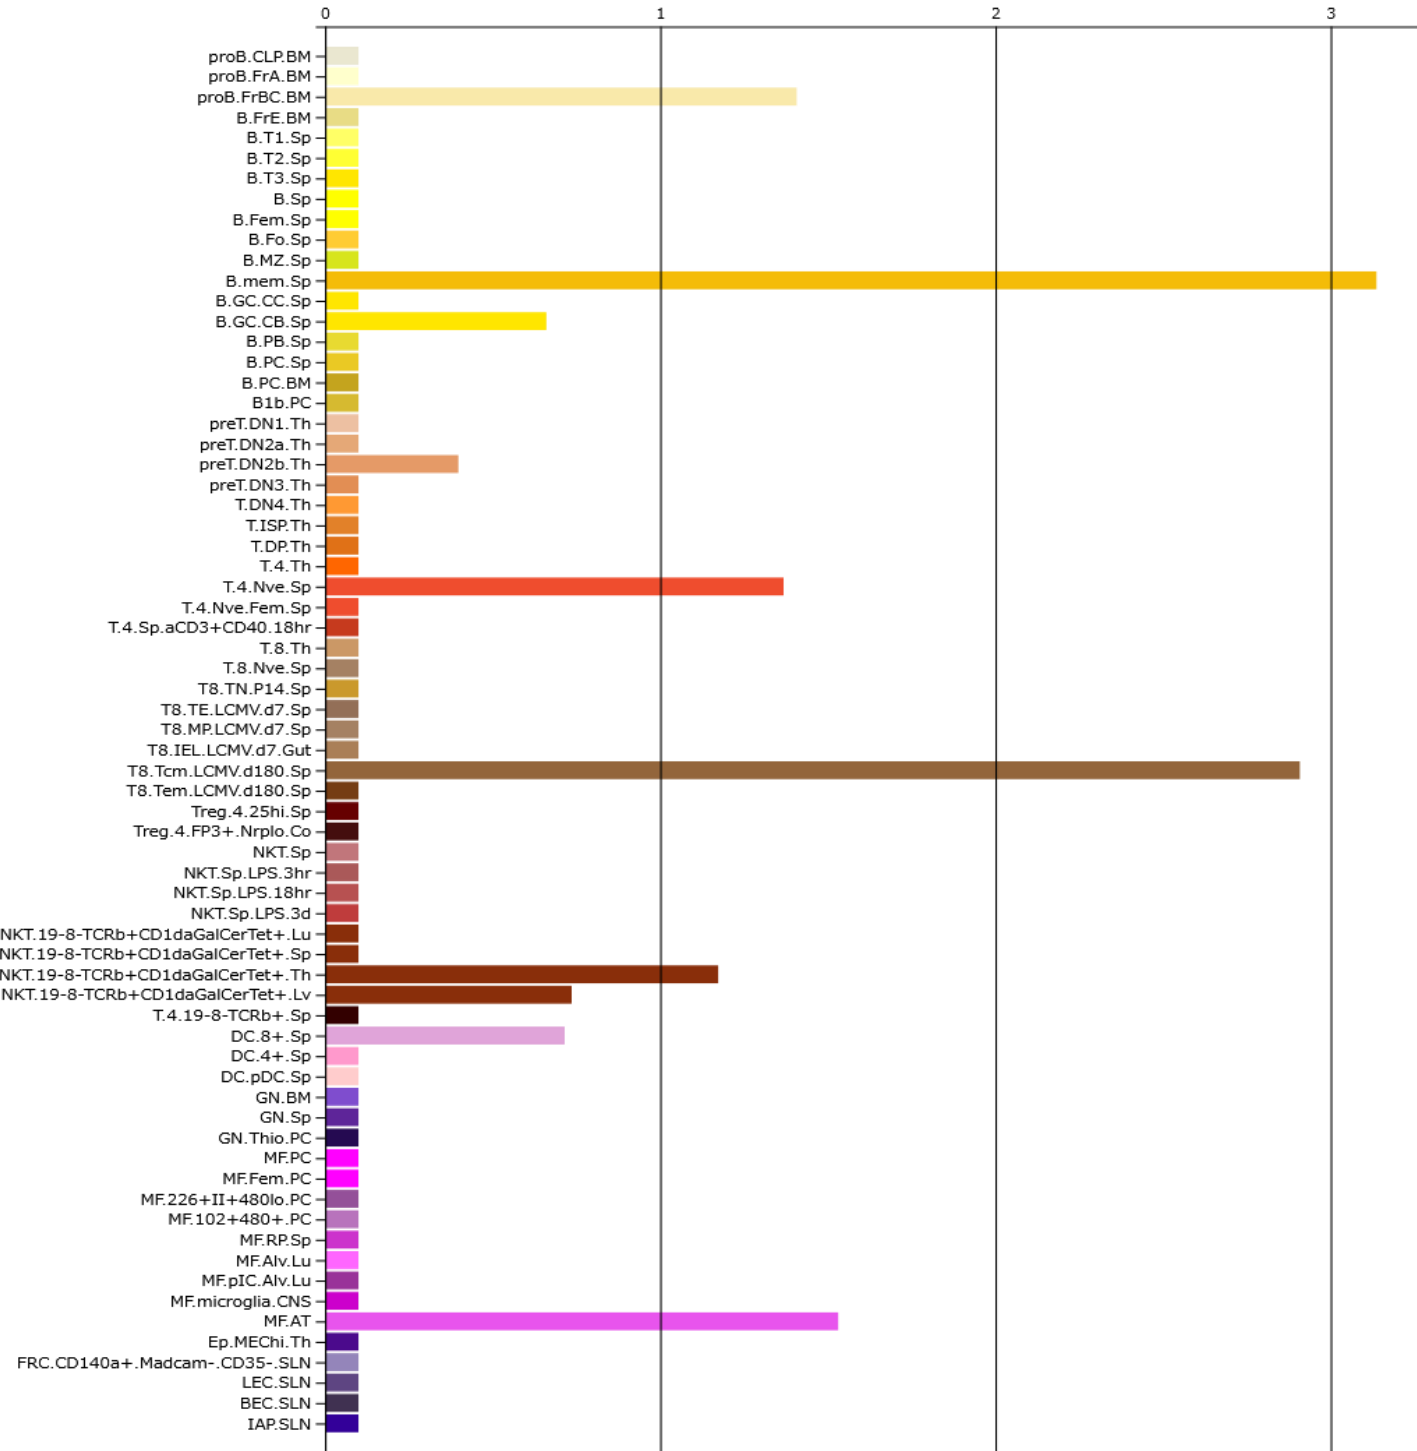

Expression Value Range

**Gene: Tas2r126**

Expression Value Normalized by DESeq2

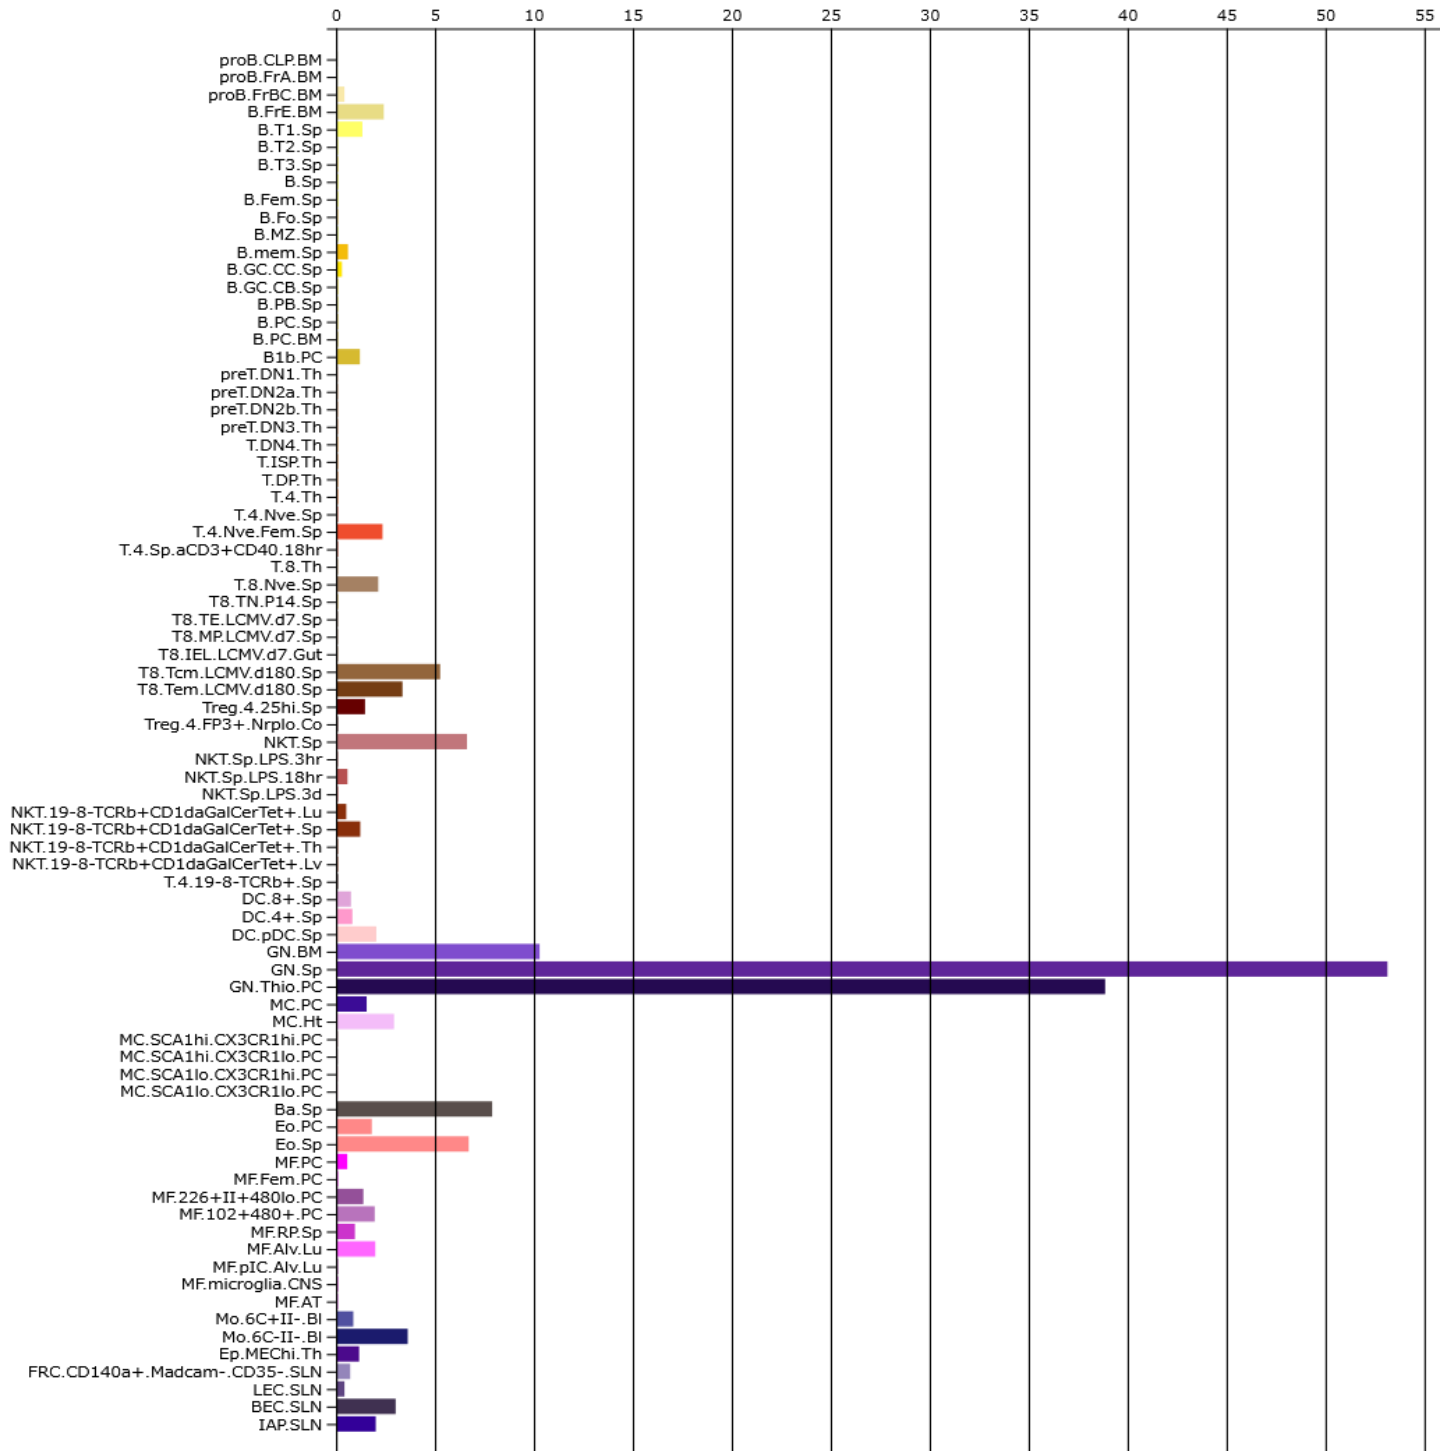

Expression Value Range

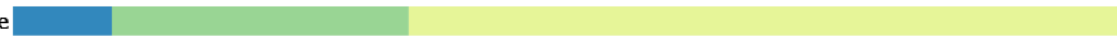

**Gene: Tas2r129**

Expression Value Normalized by DESeq2

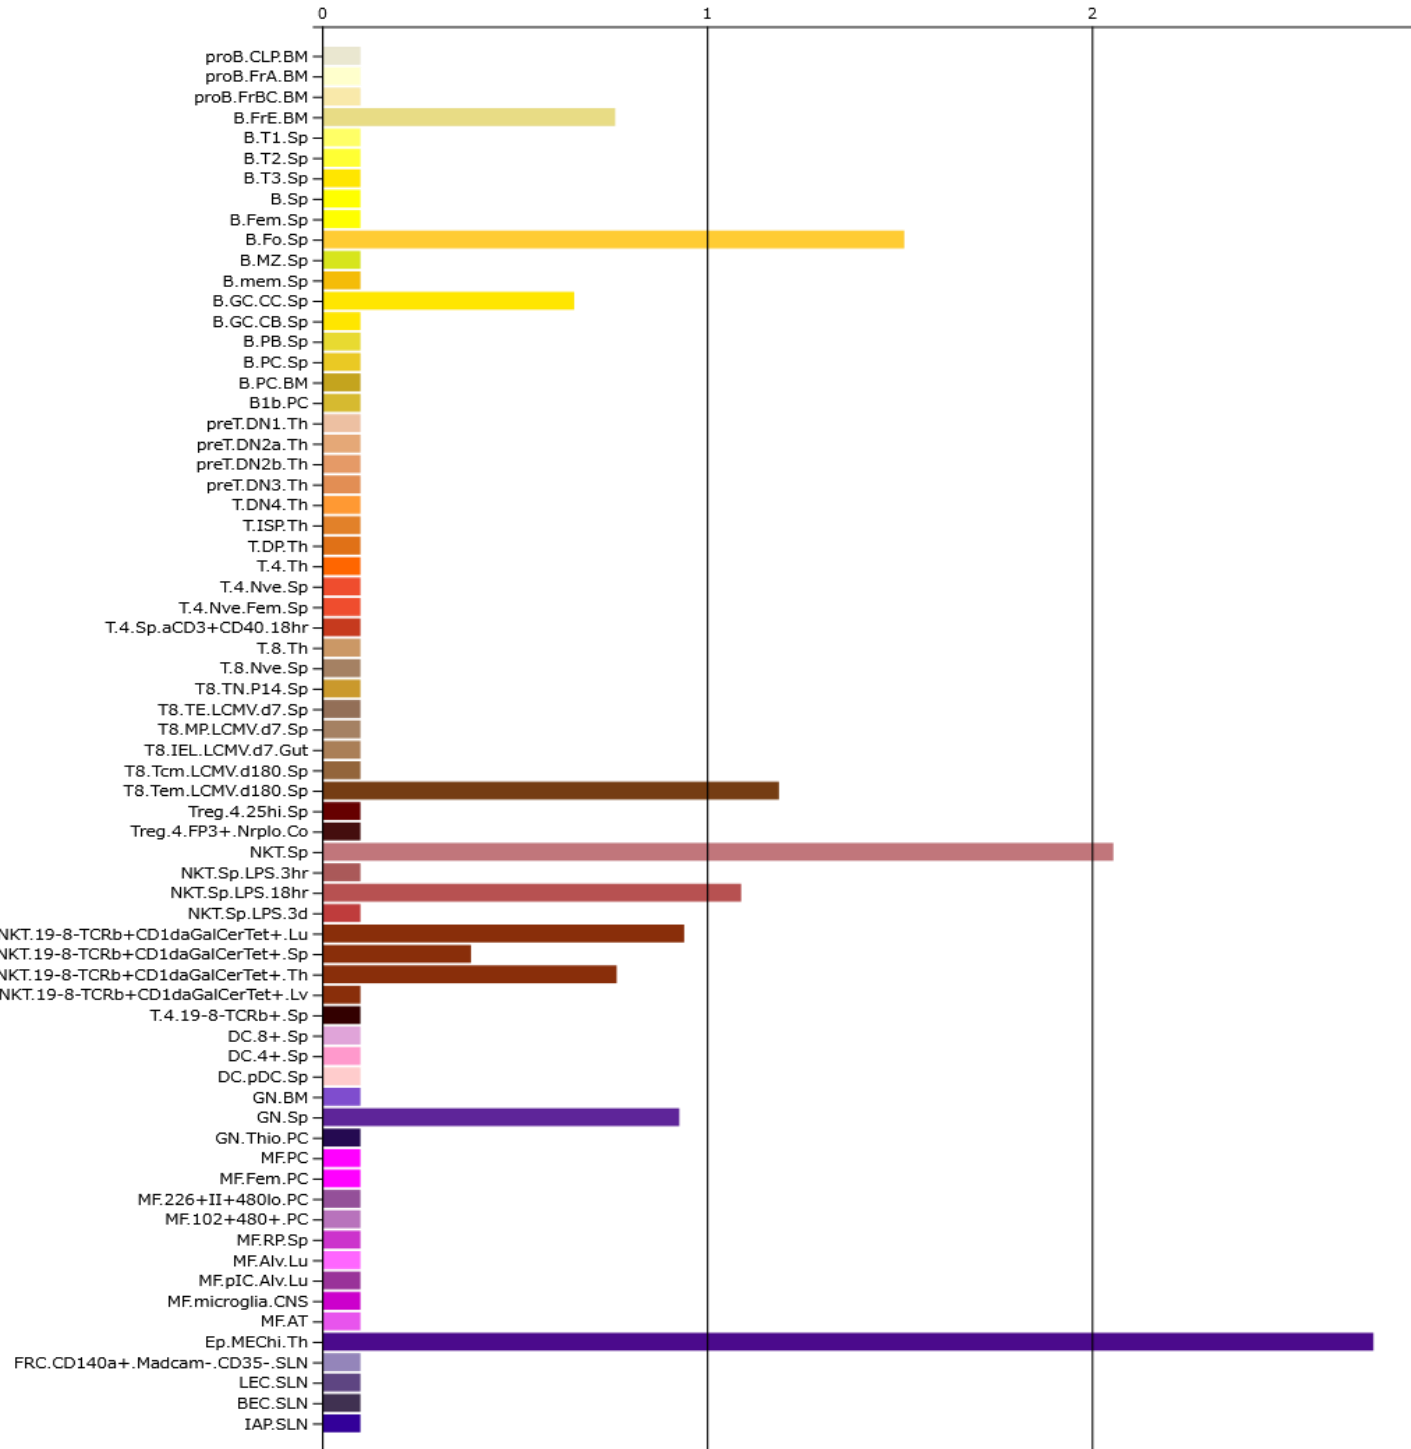

Expression Value Range

Gene: Tas2r130

Expression Value Normalized by DESeq2

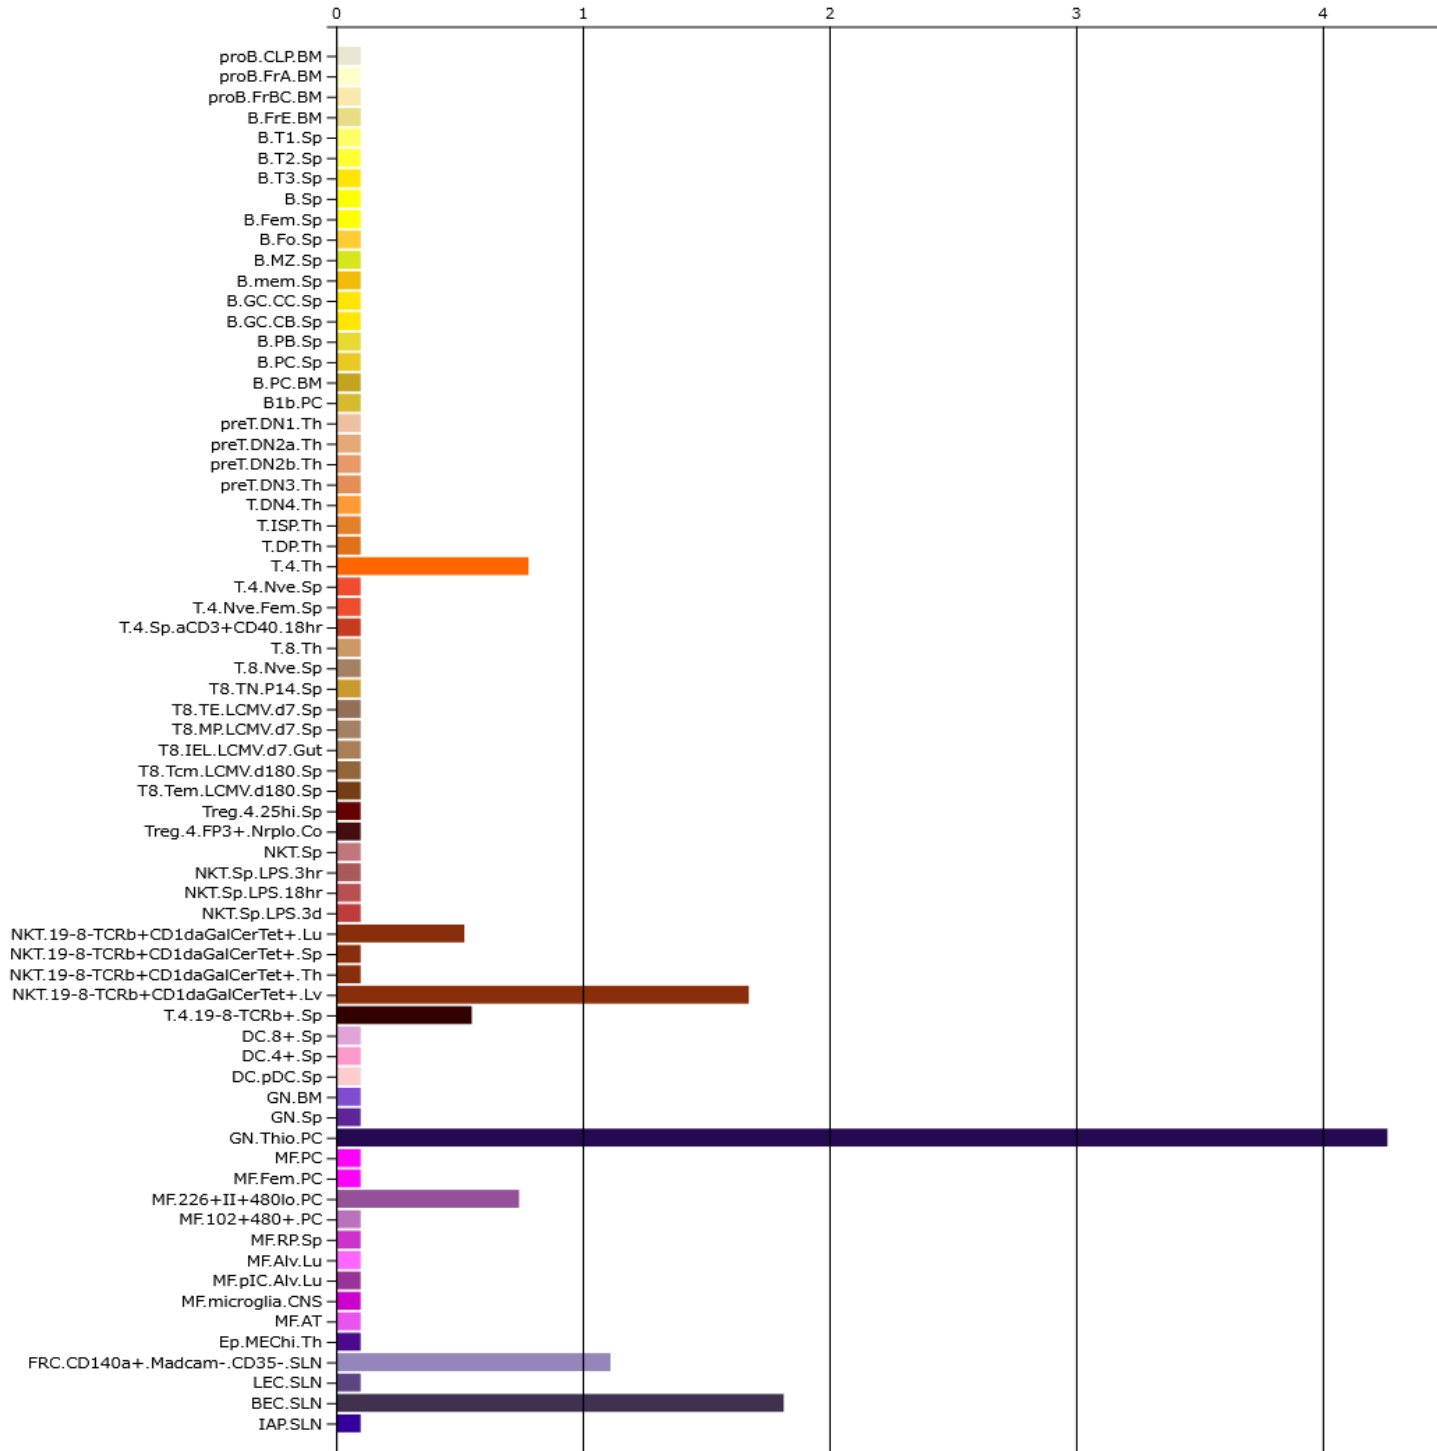

Expression Value Range

**Gene: Tas2r131**

Expression Value Normalized by DESeq2

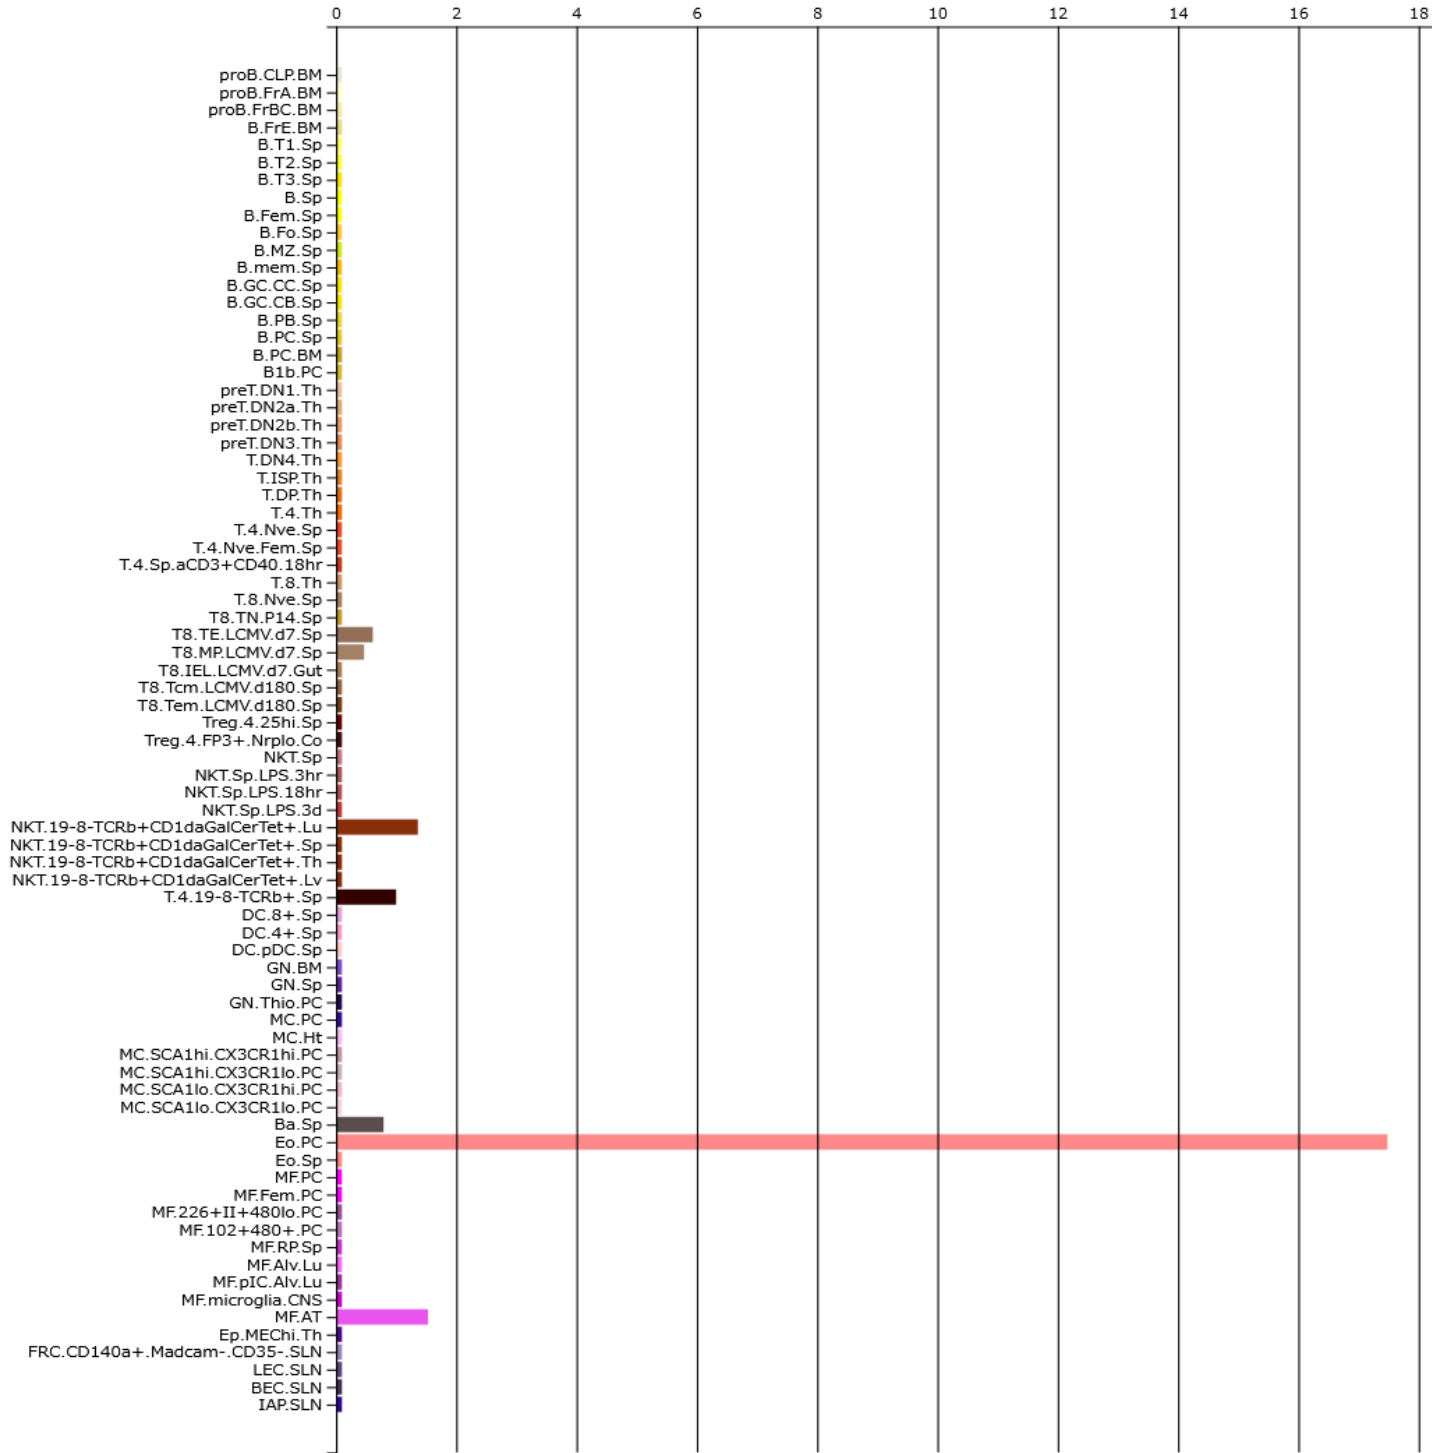

Expression Value Range

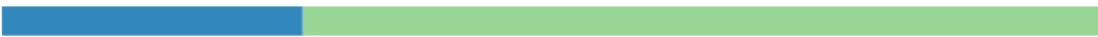



**Gene: Tas2r134**

Expression Value Normalized by DESeq2

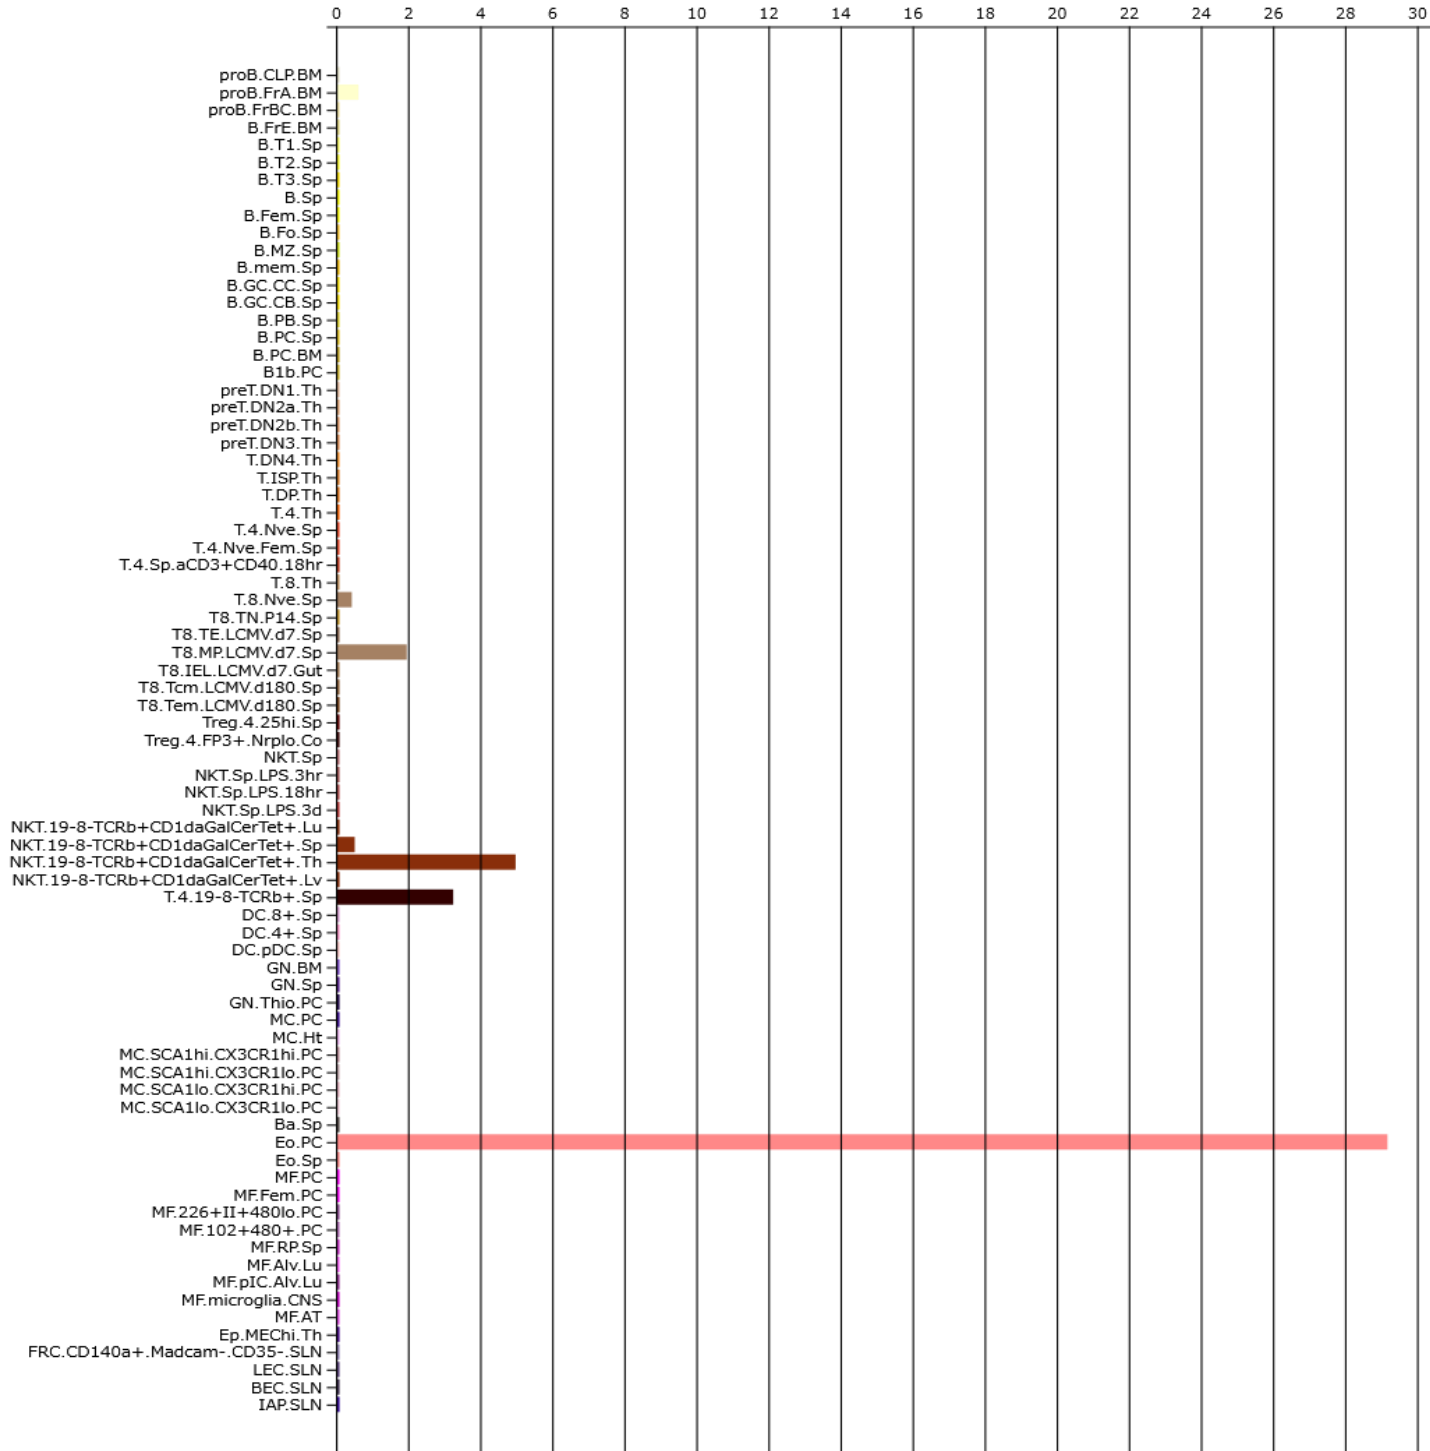

Expression Value Range

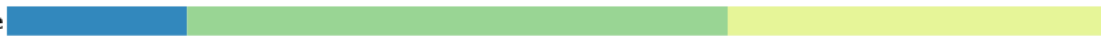

**Gene: Tas2r135**

Expression Value Normalized by DESeq2

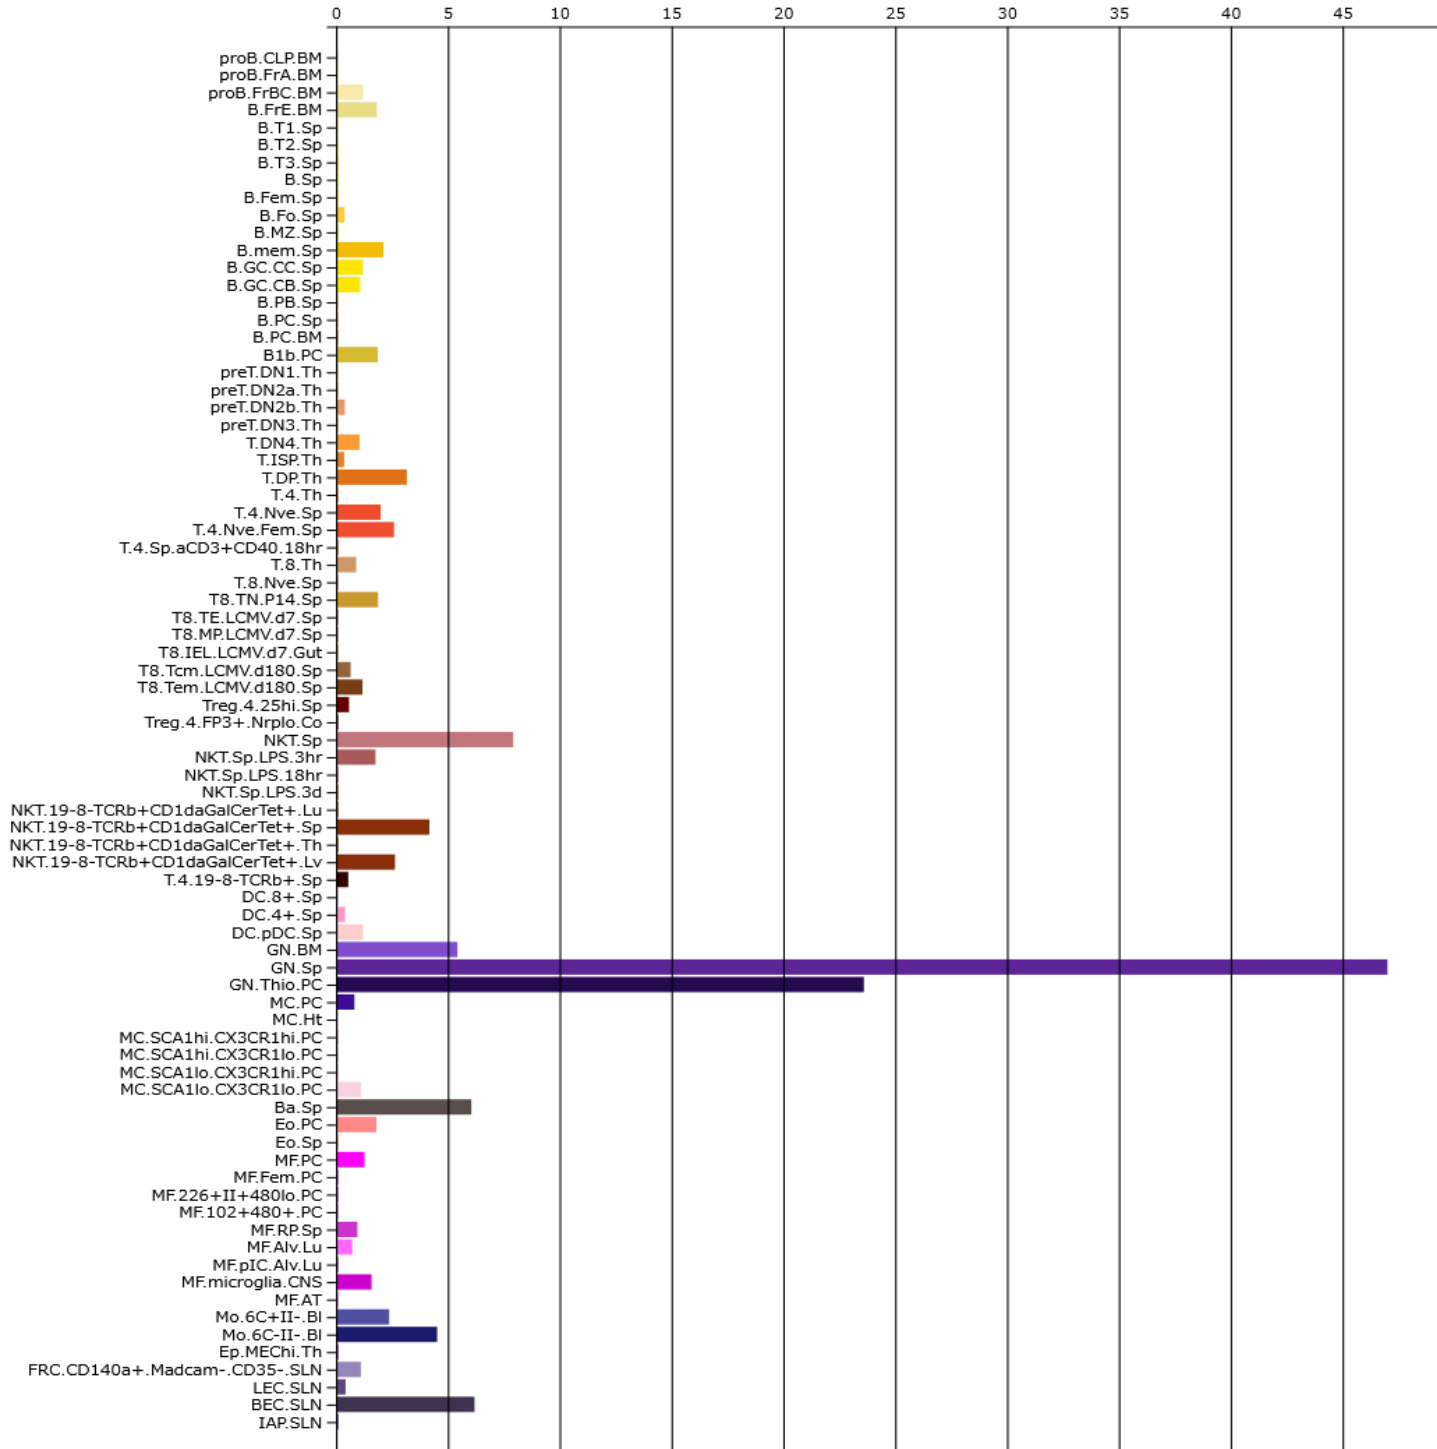

Expression Value Range

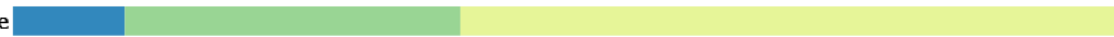

Gene: Tas2r136

Expression Value Normalized by DESeq2

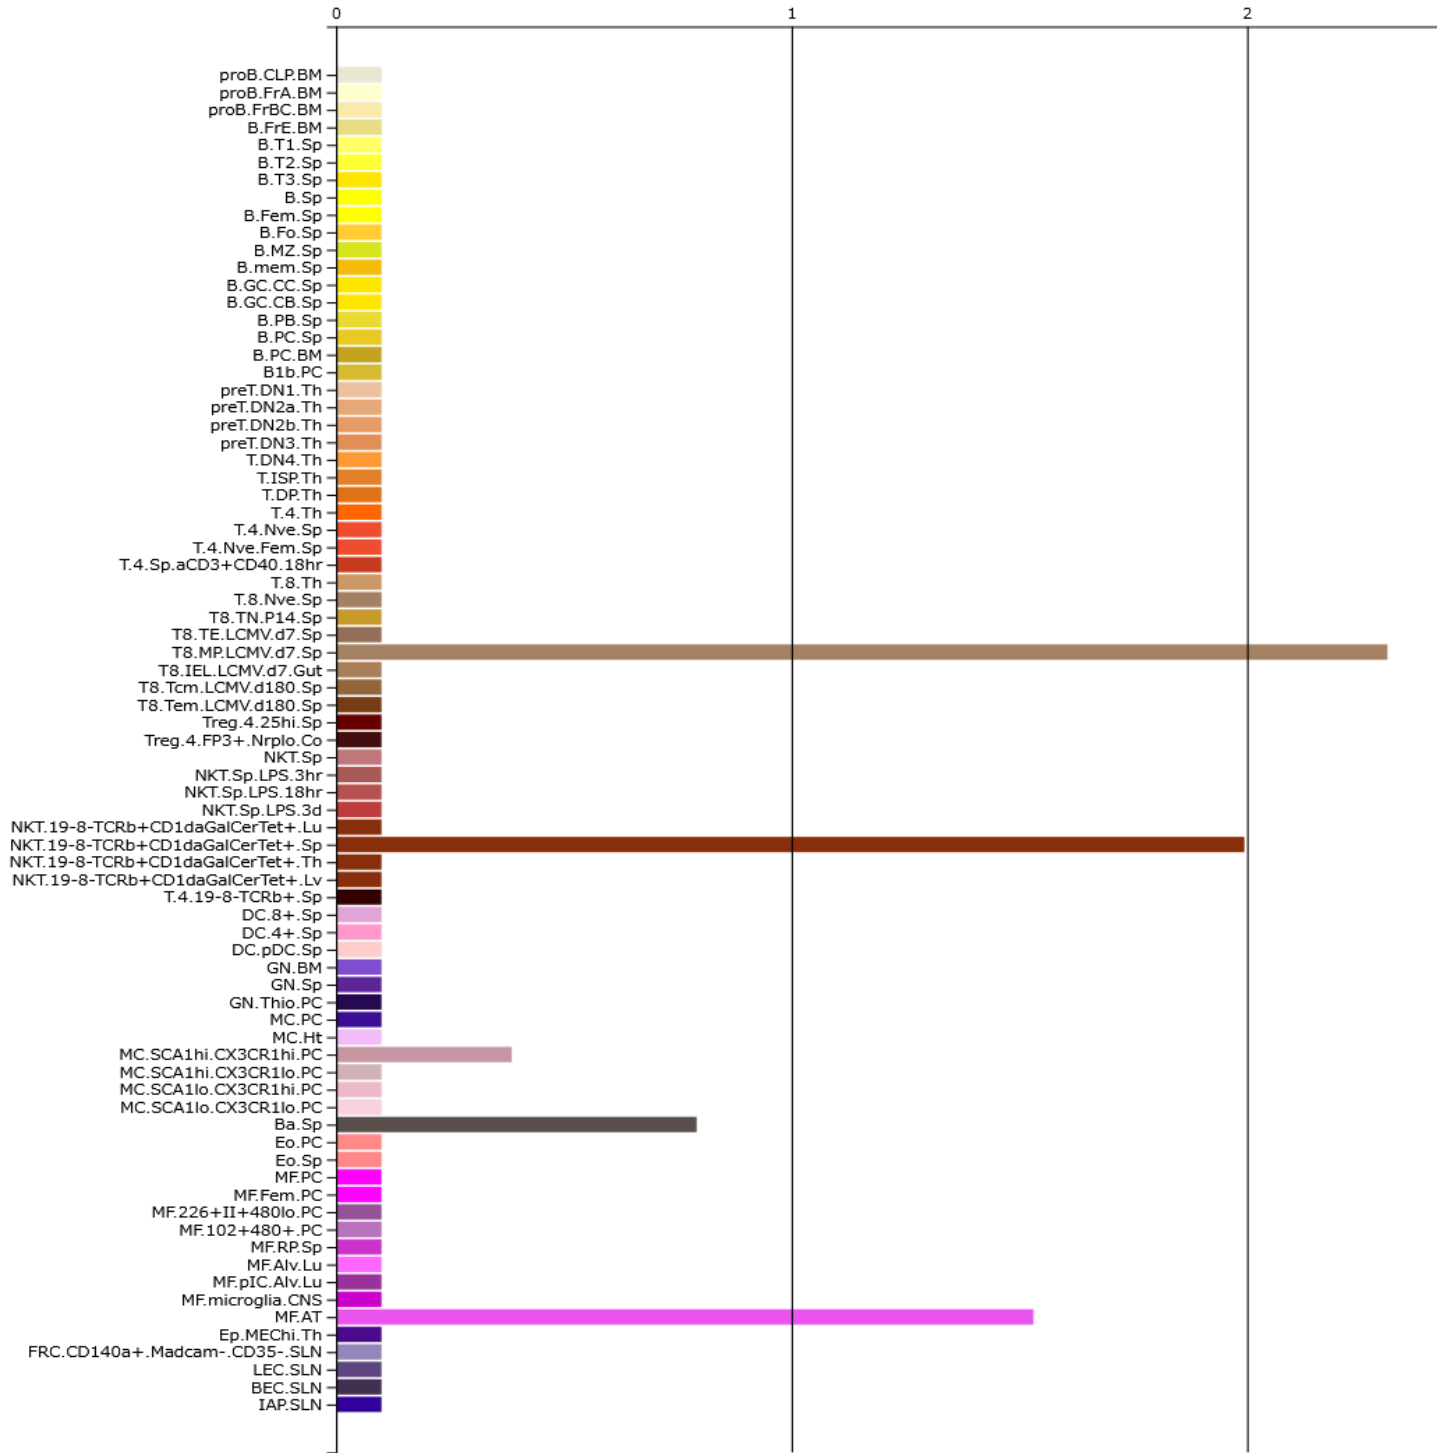

Expression Value Range

**Gene: Tas2r137**

Expression Value Normalized by DESeq2

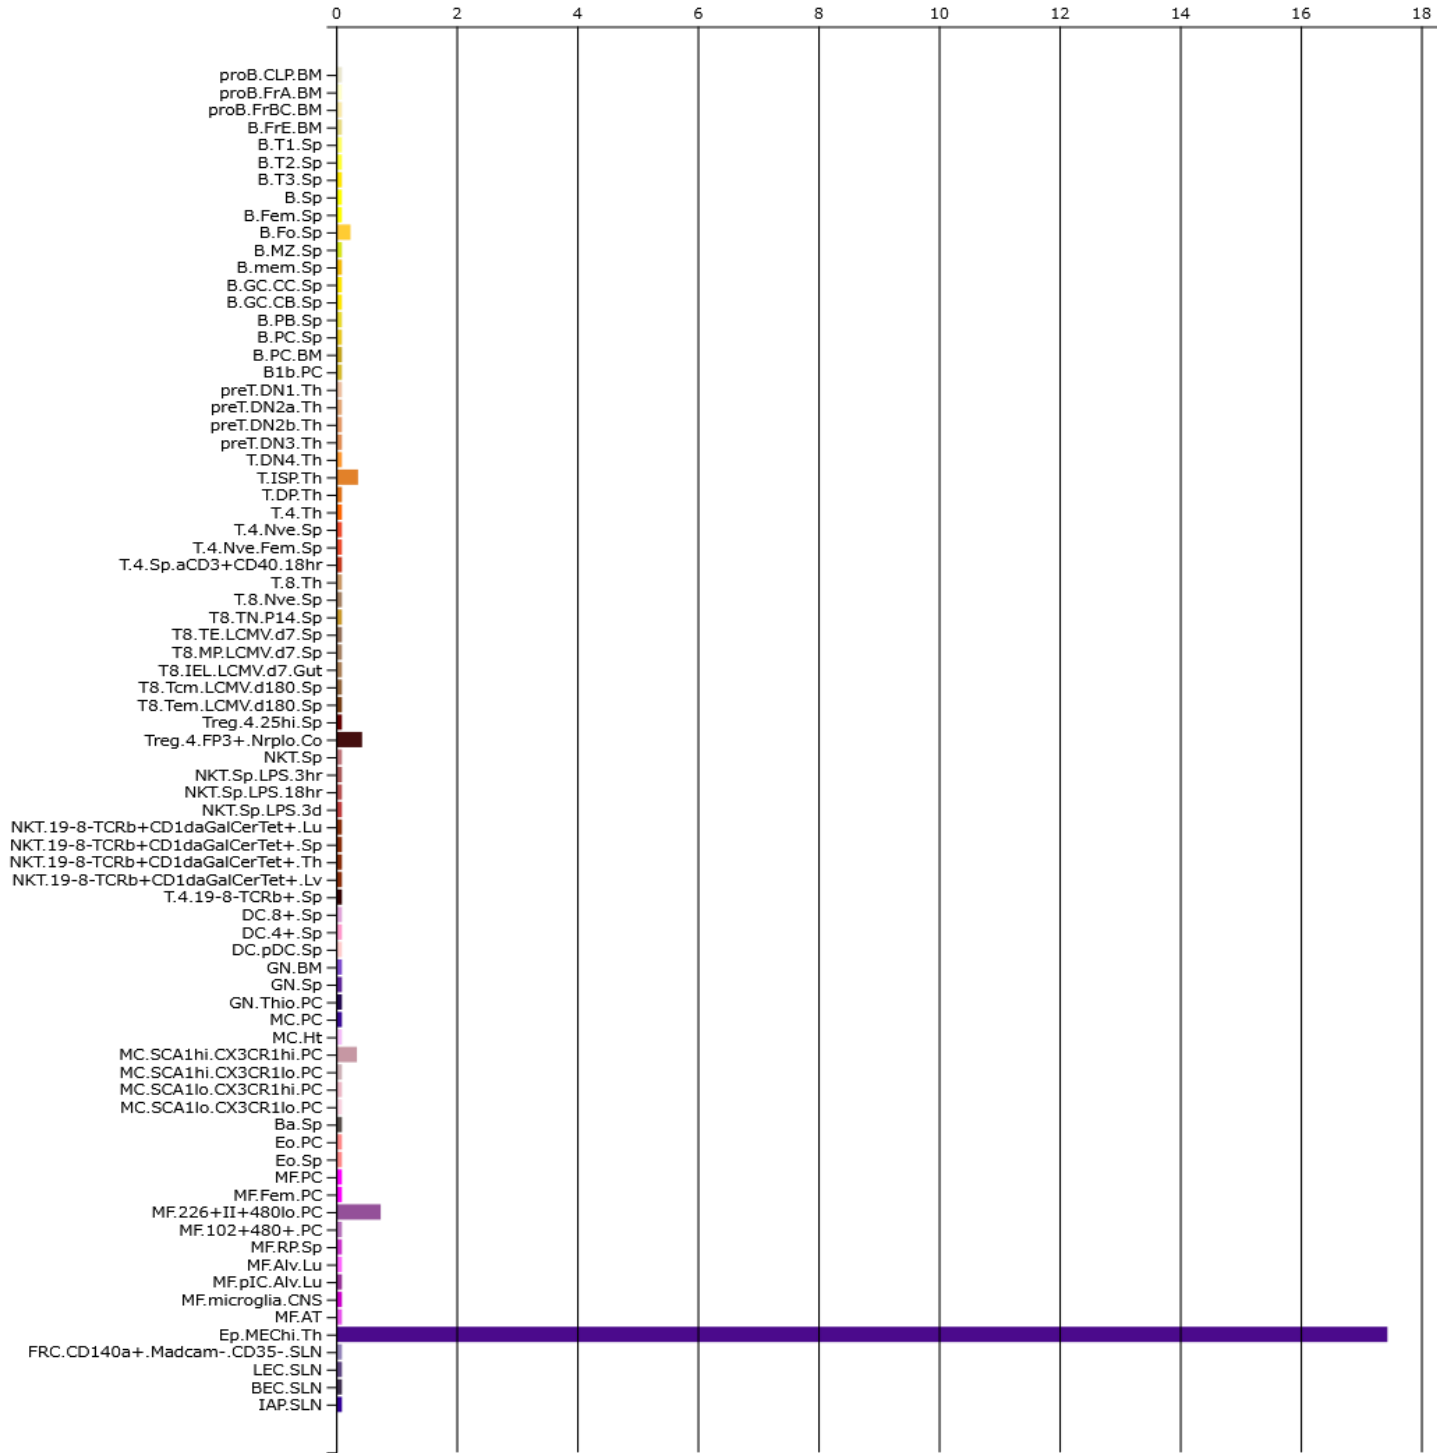

Expression Value Range

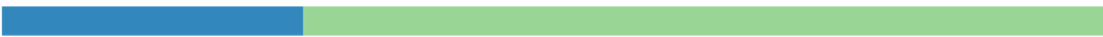

Gene: Tas2r138

Expression Value Normalized by DESeq2

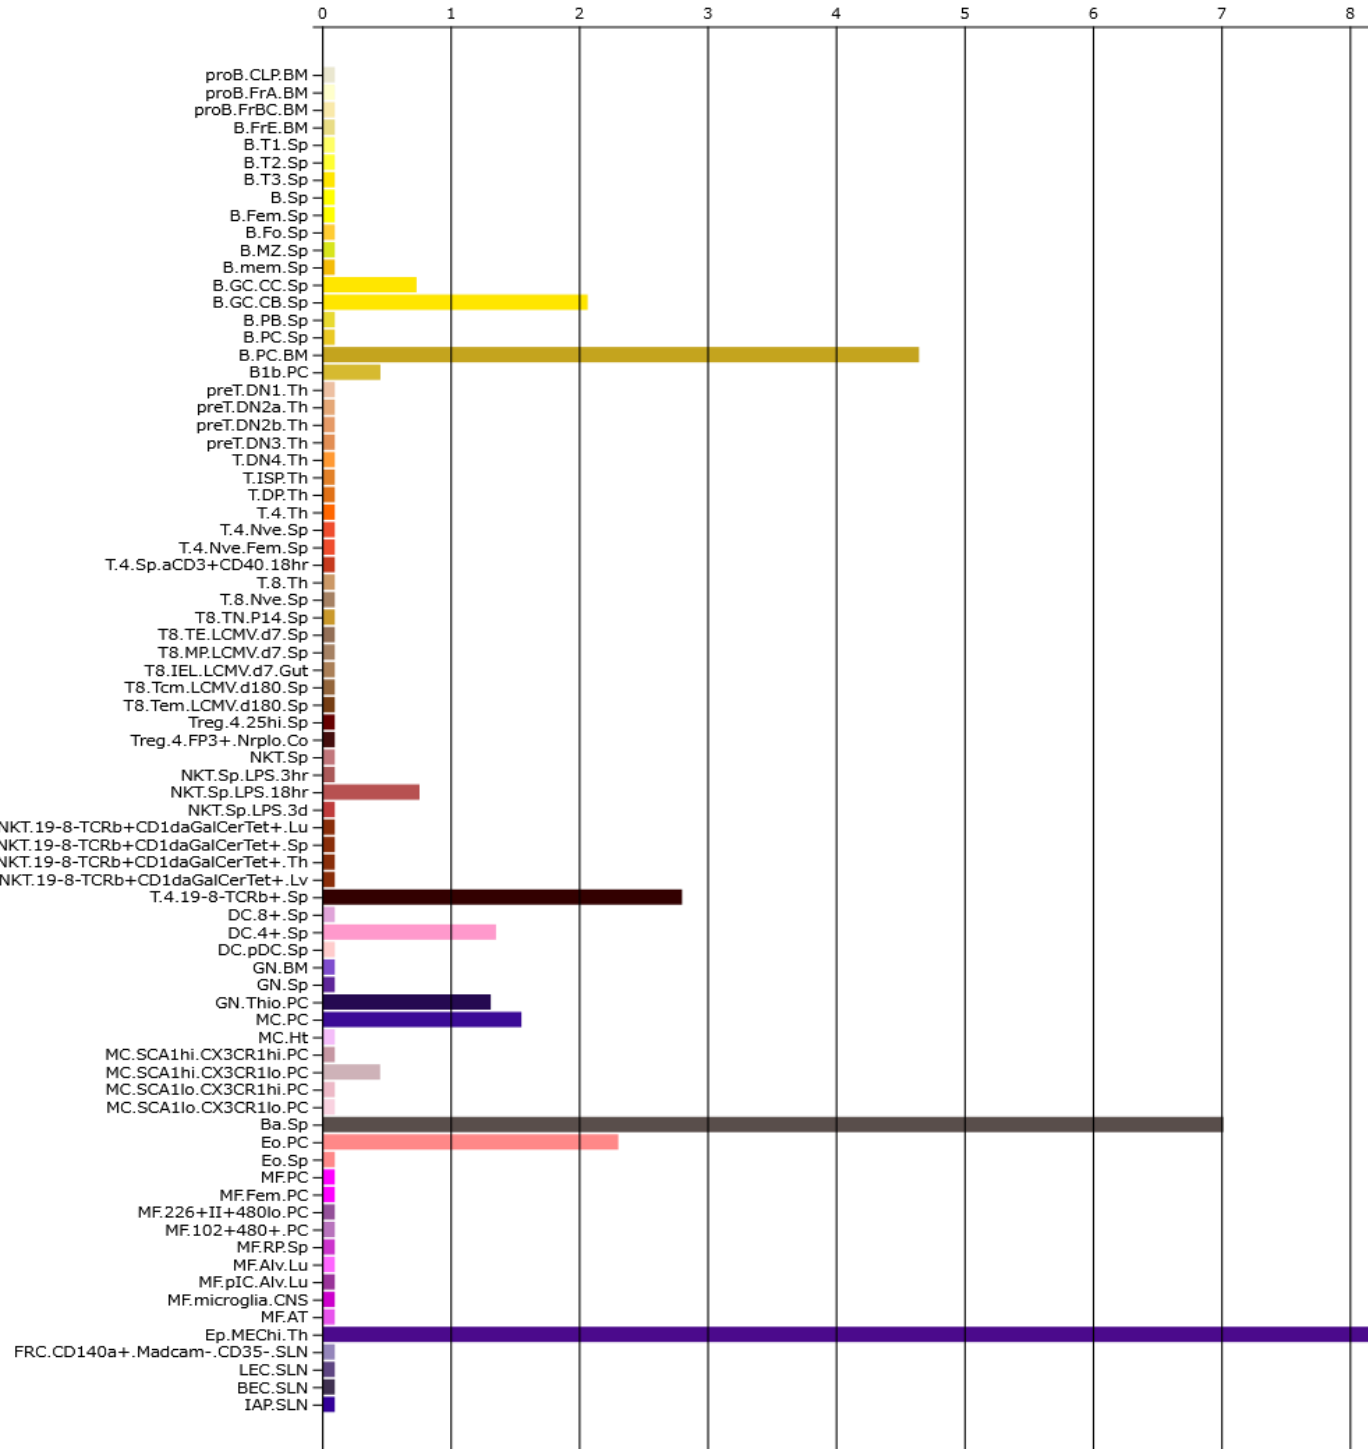

Expression Value Range

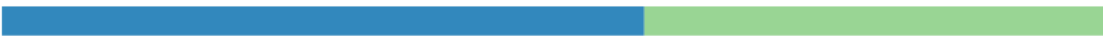

Gene: Tas2r139

Expression Value Normalized by DESeq2

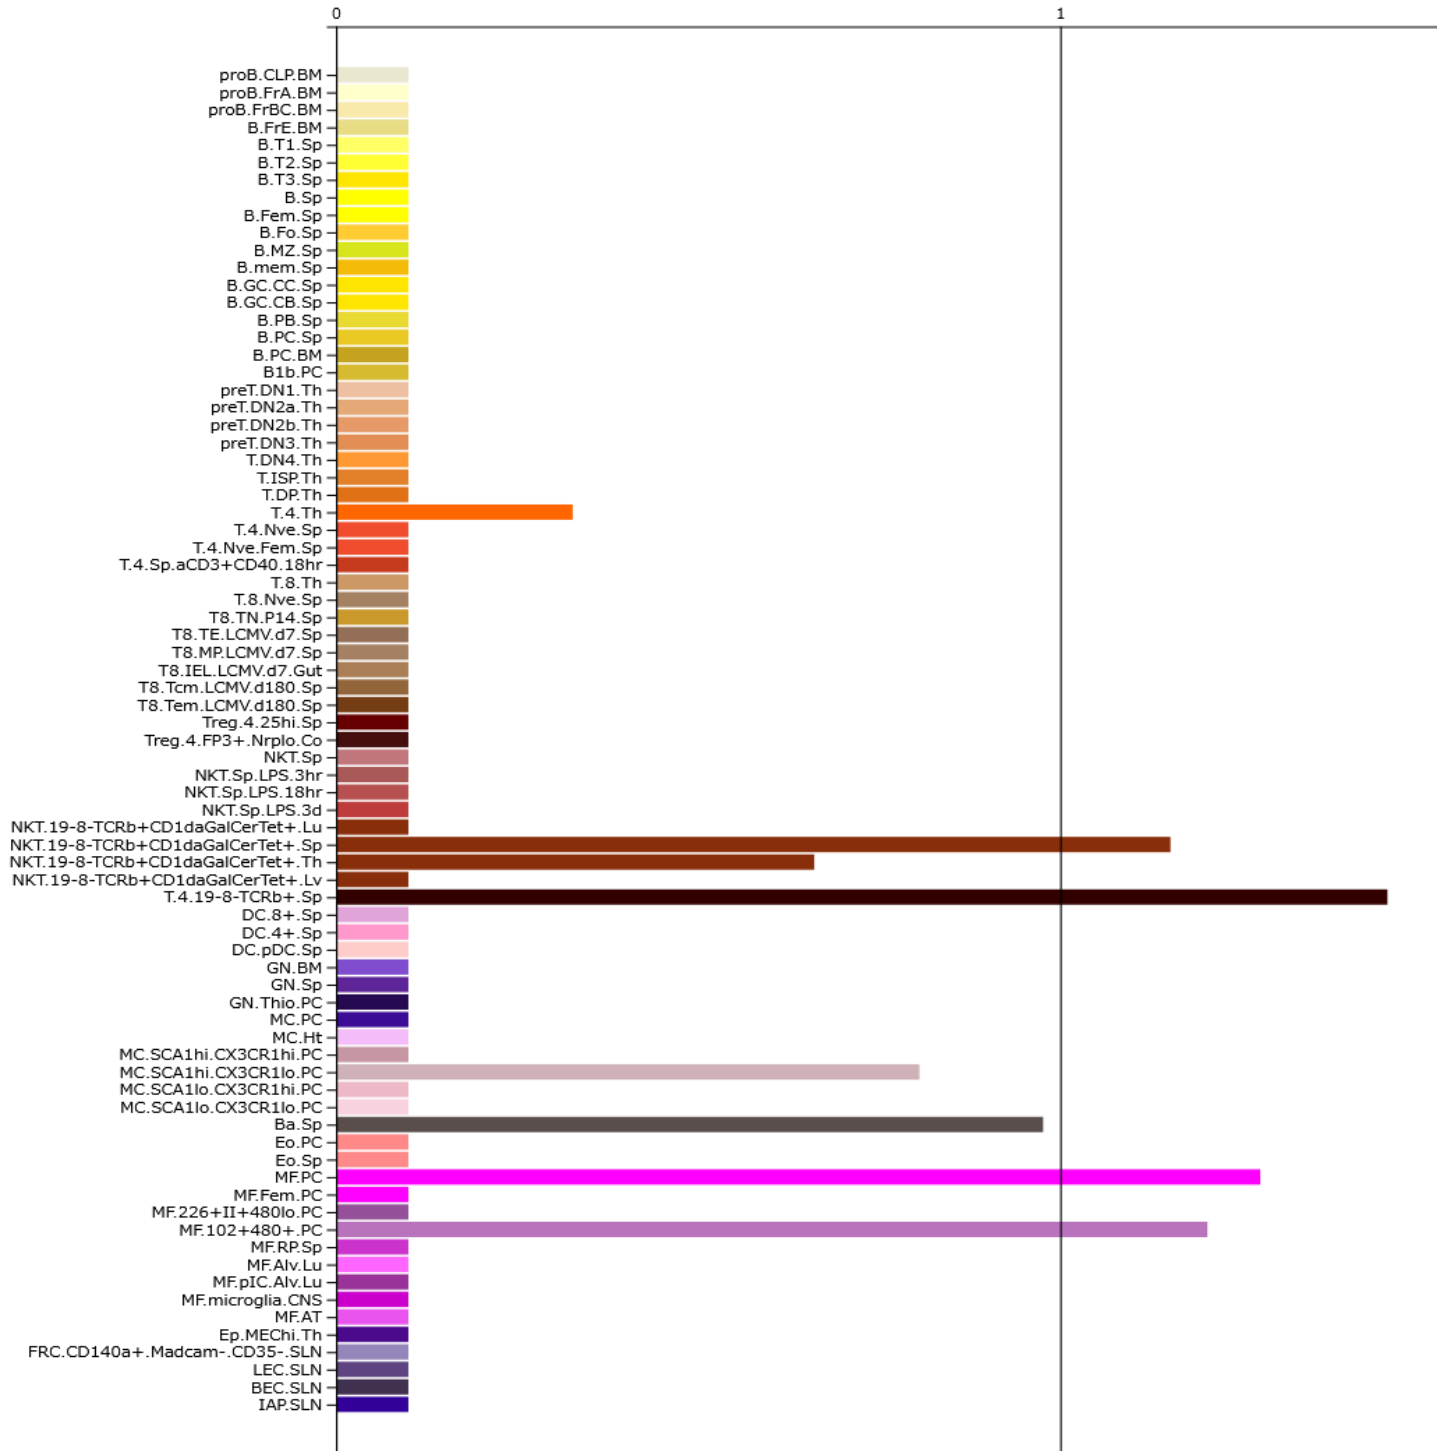

Expression Value Range

**Gene: Tas2r140**

Expression Value Normalized by DESeq2

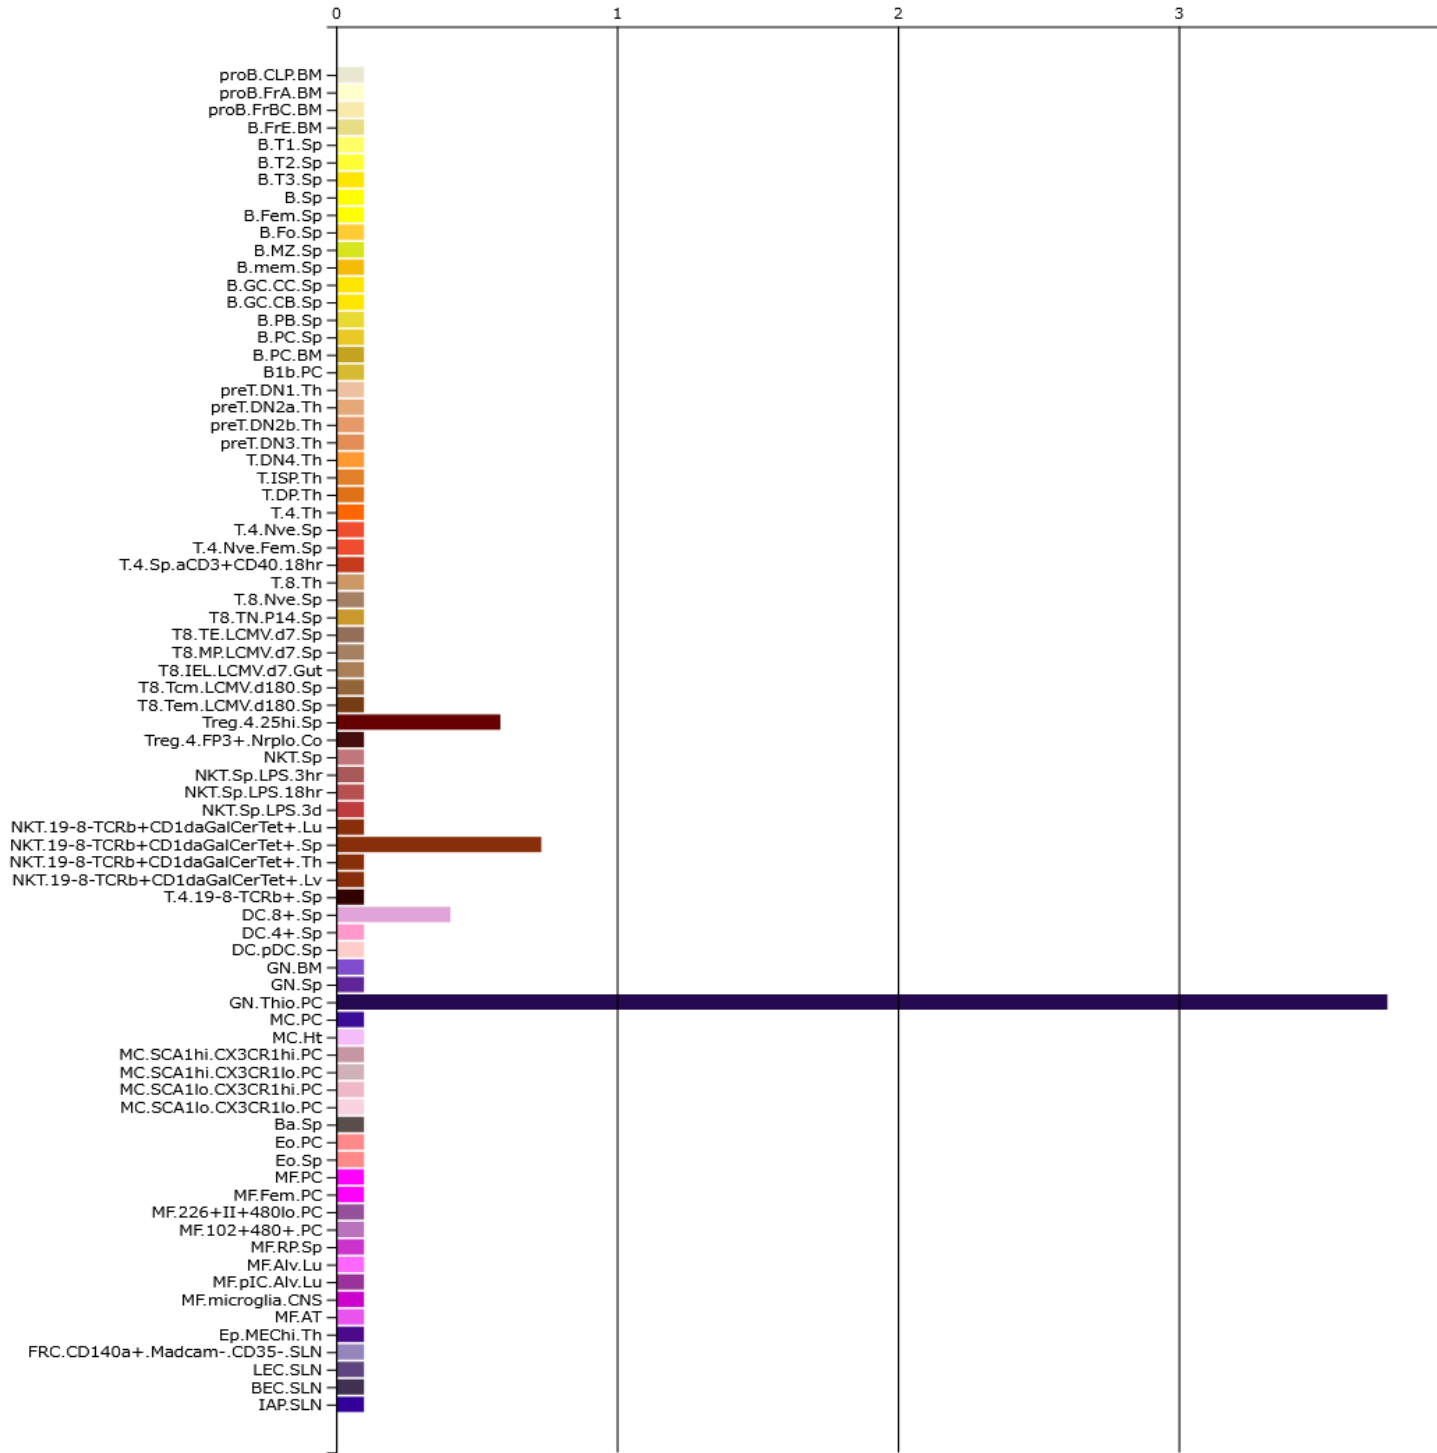

Expression Value Range

**Gene: Tas2r141-ps4**

Expression Value Normalized by DESeq2

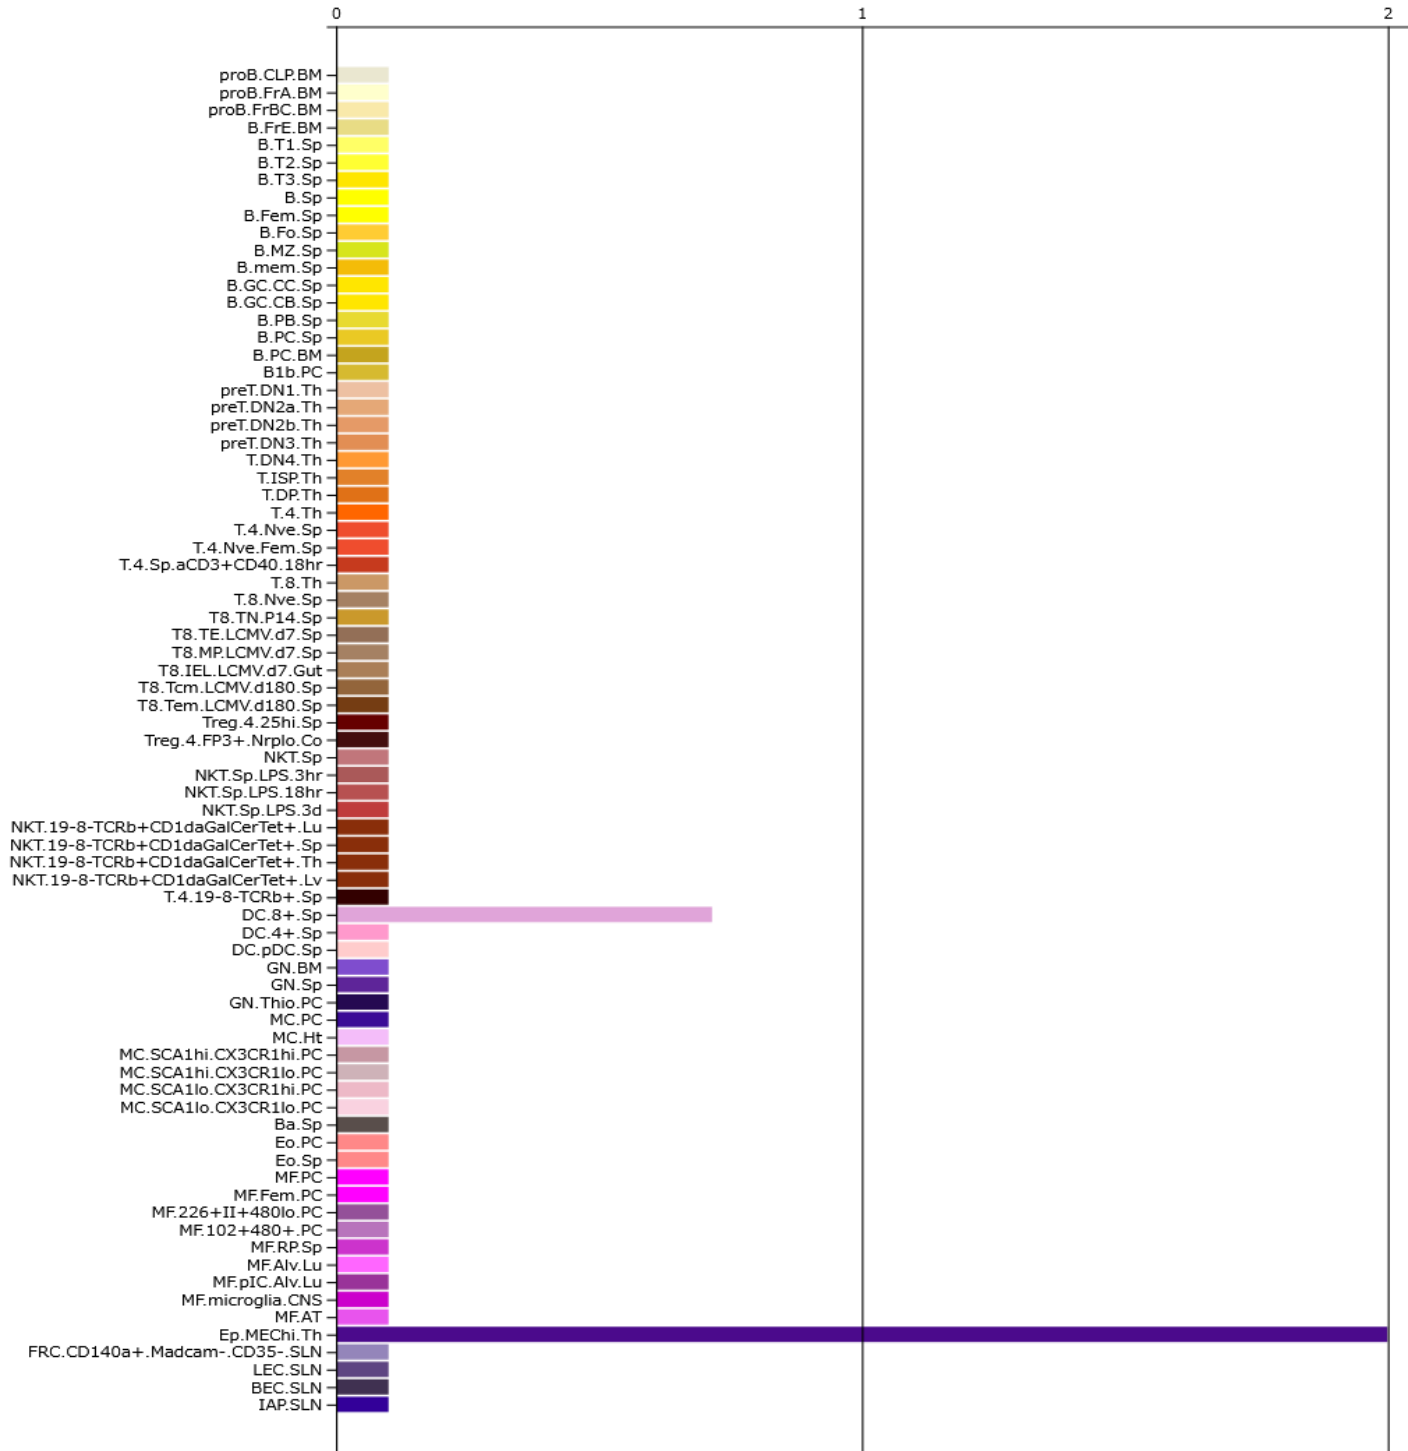

Expression Value Range



**Gene: Tas2r143**

Expression Value Normalized by DESeq2

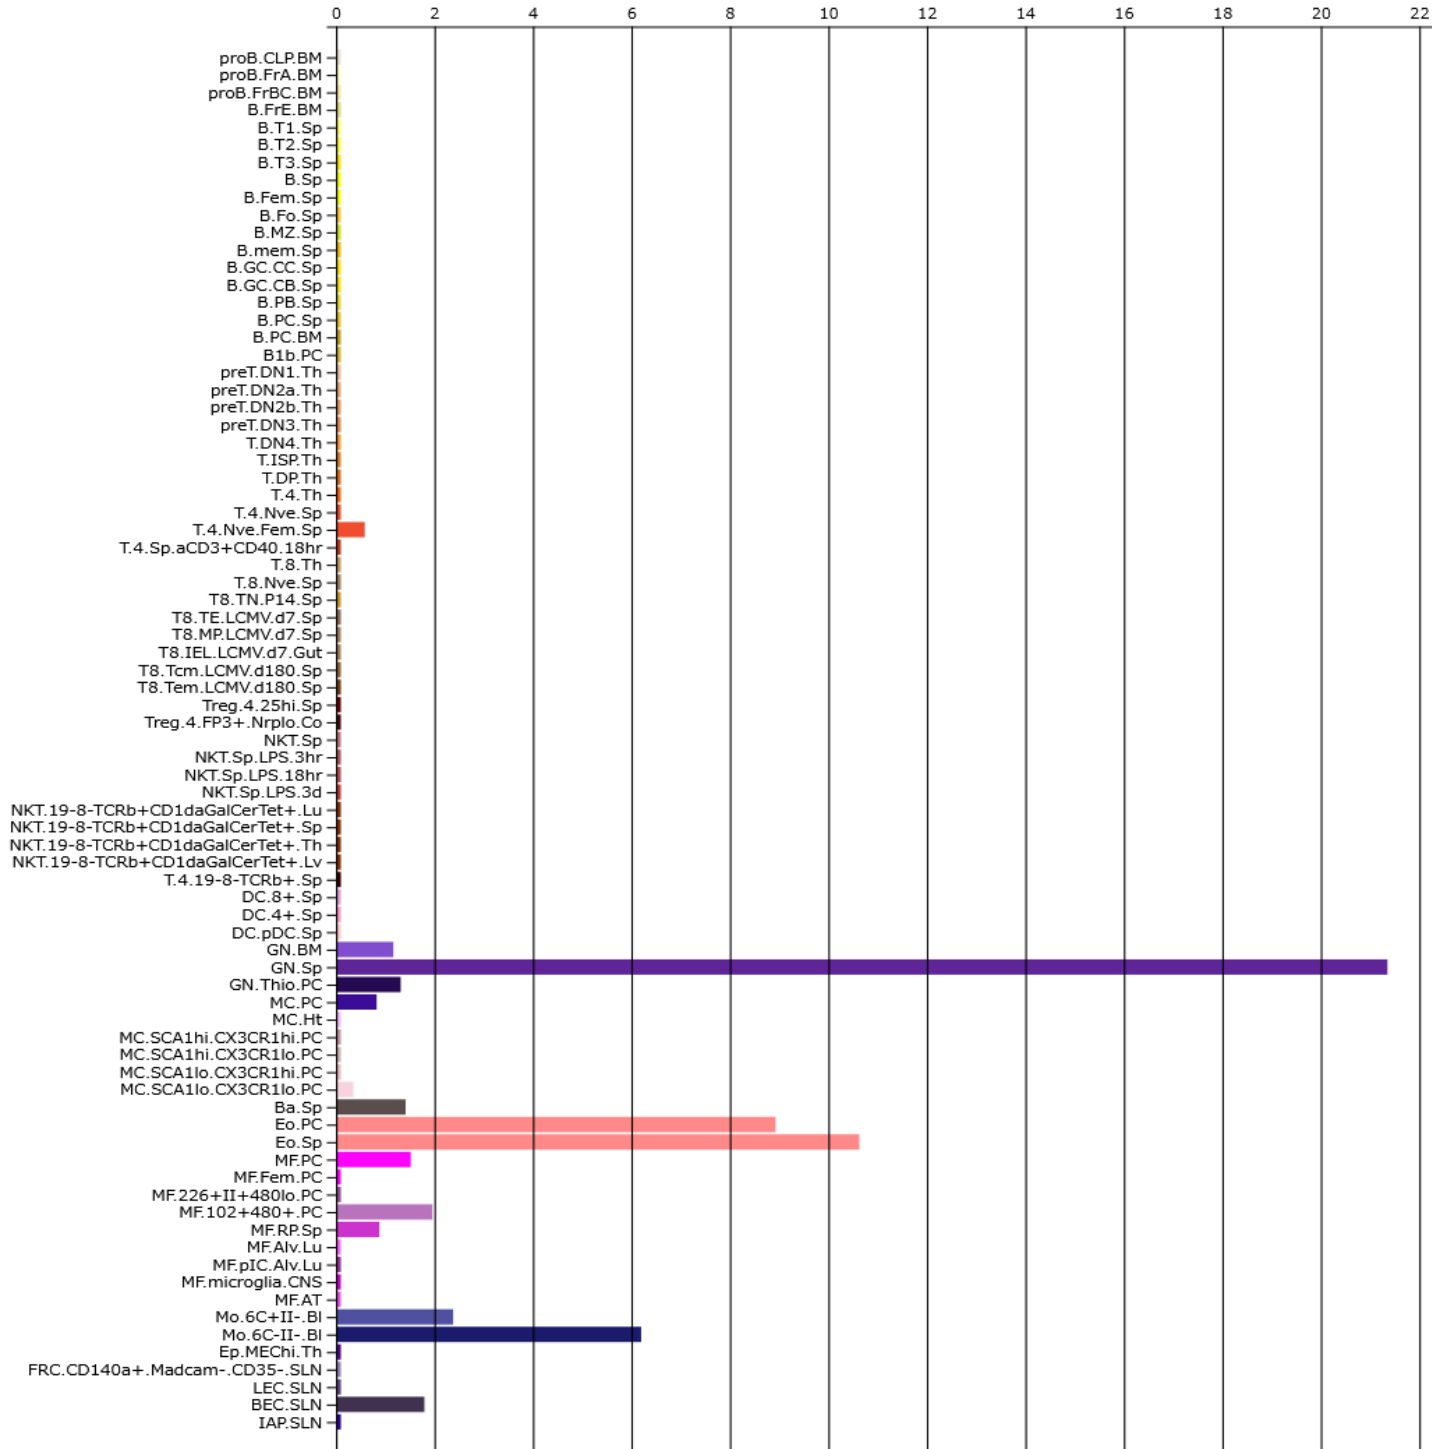

Expression Value Range

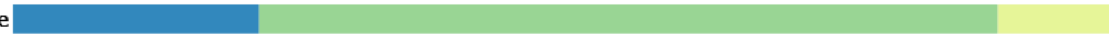

Gene: Tas2r144

Expression Value Normalized by DESeq2

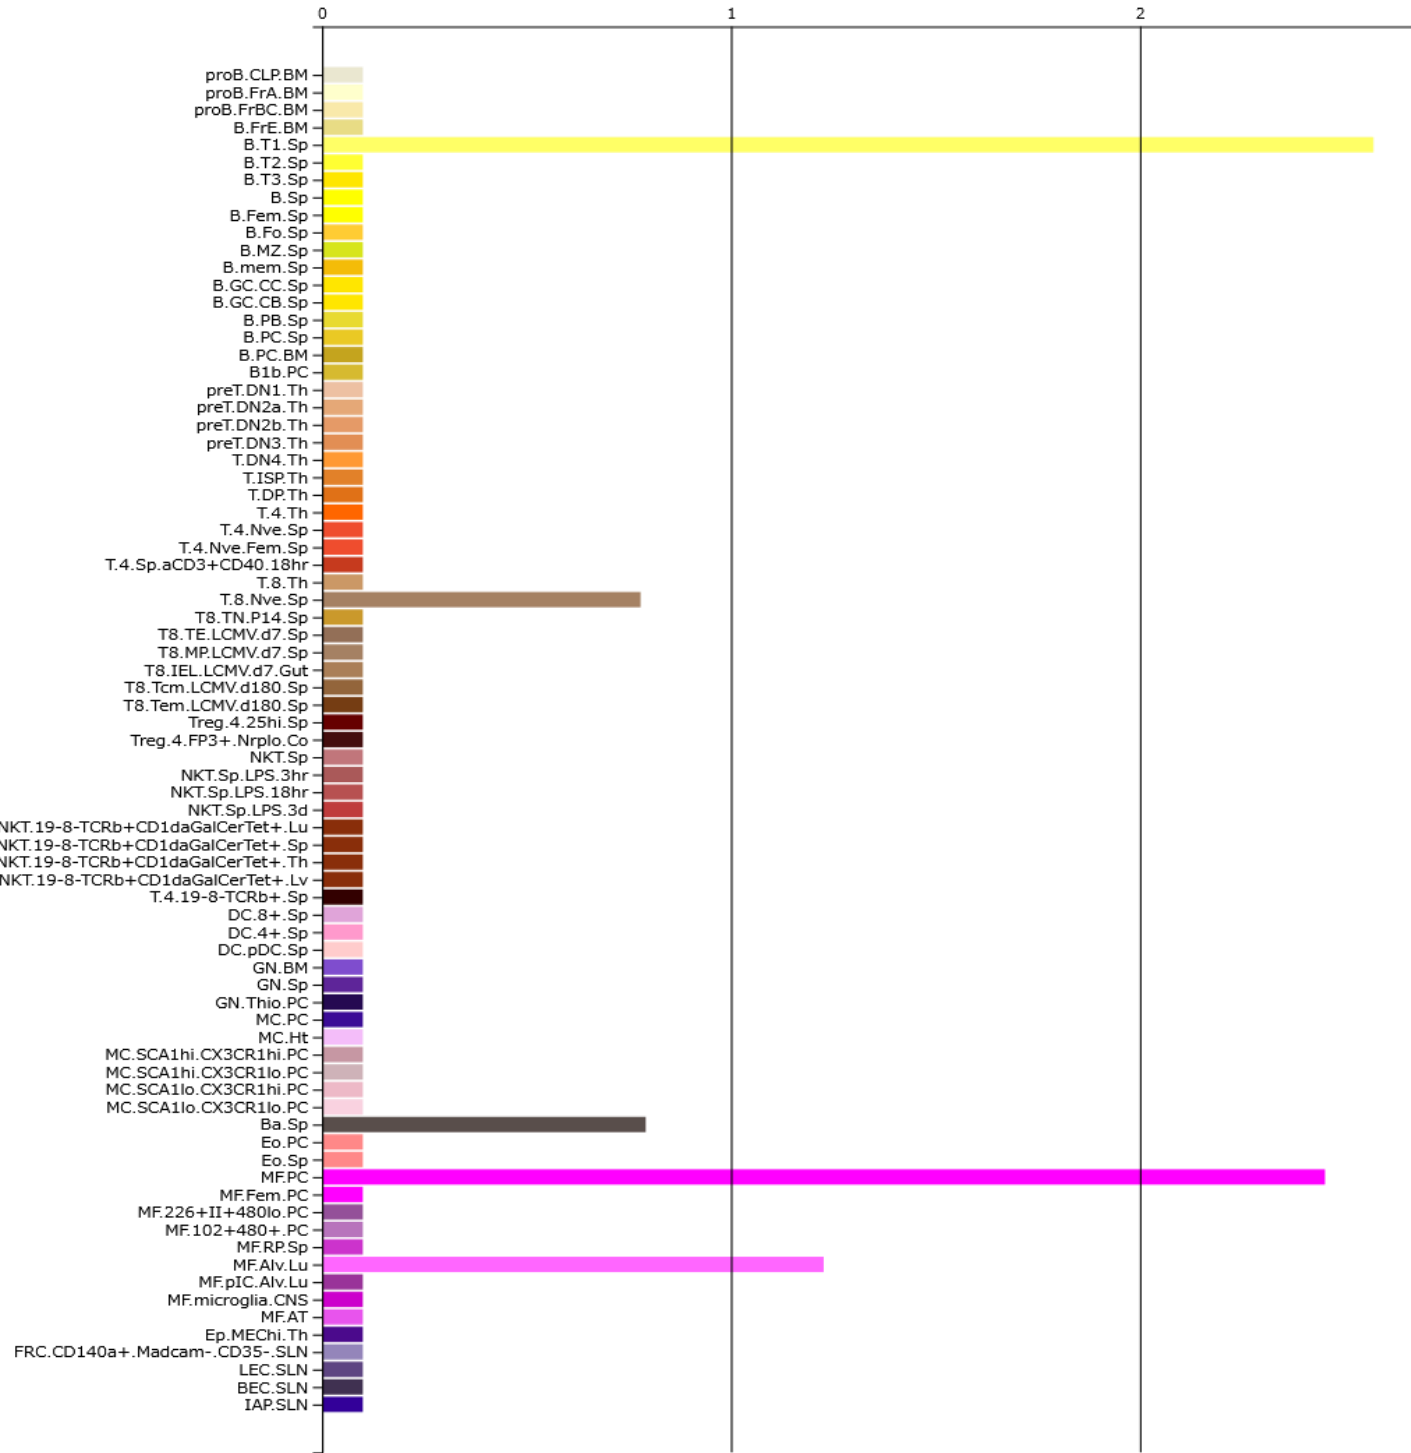

Expression Value Range

**Gene: Tas2r145-ps3**

Expression Value Normalized by DESeq2

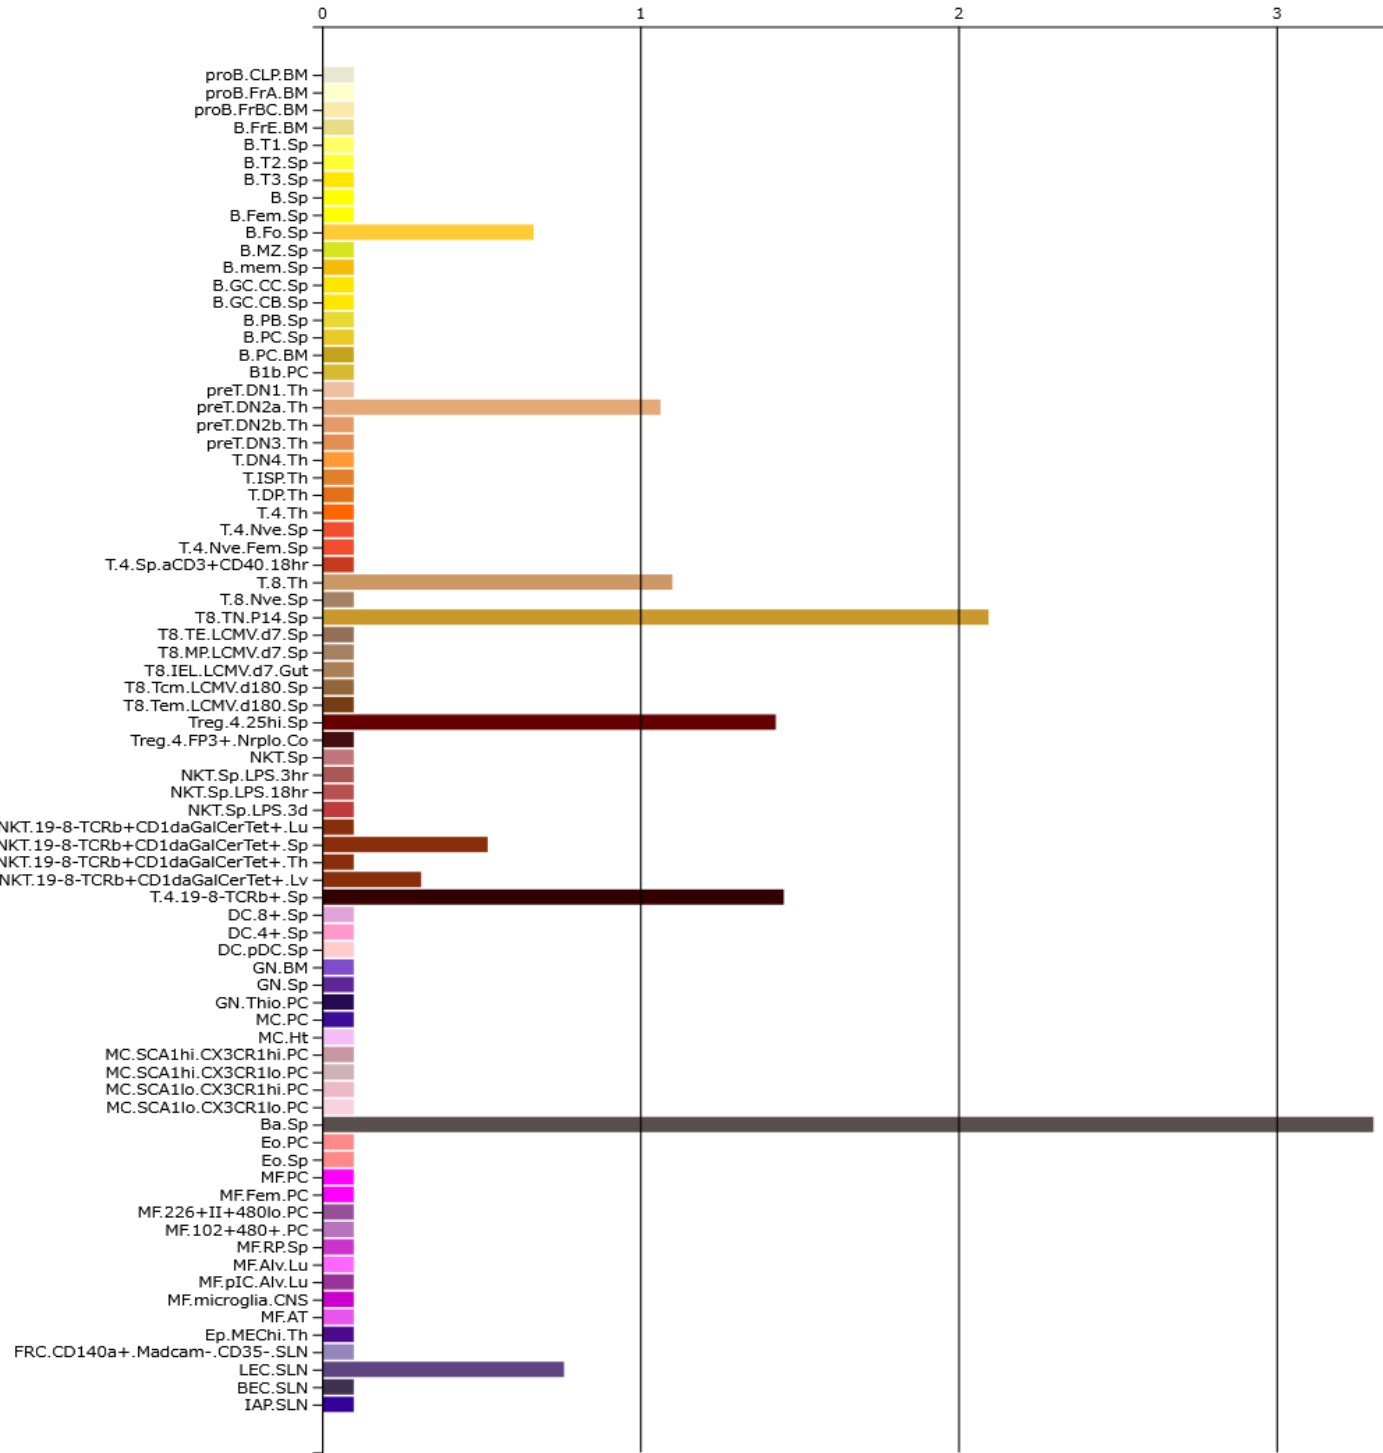

Expression Value Range

**Gene: Tas2r146-ps1**

Expression Value Normalized by DESeq2

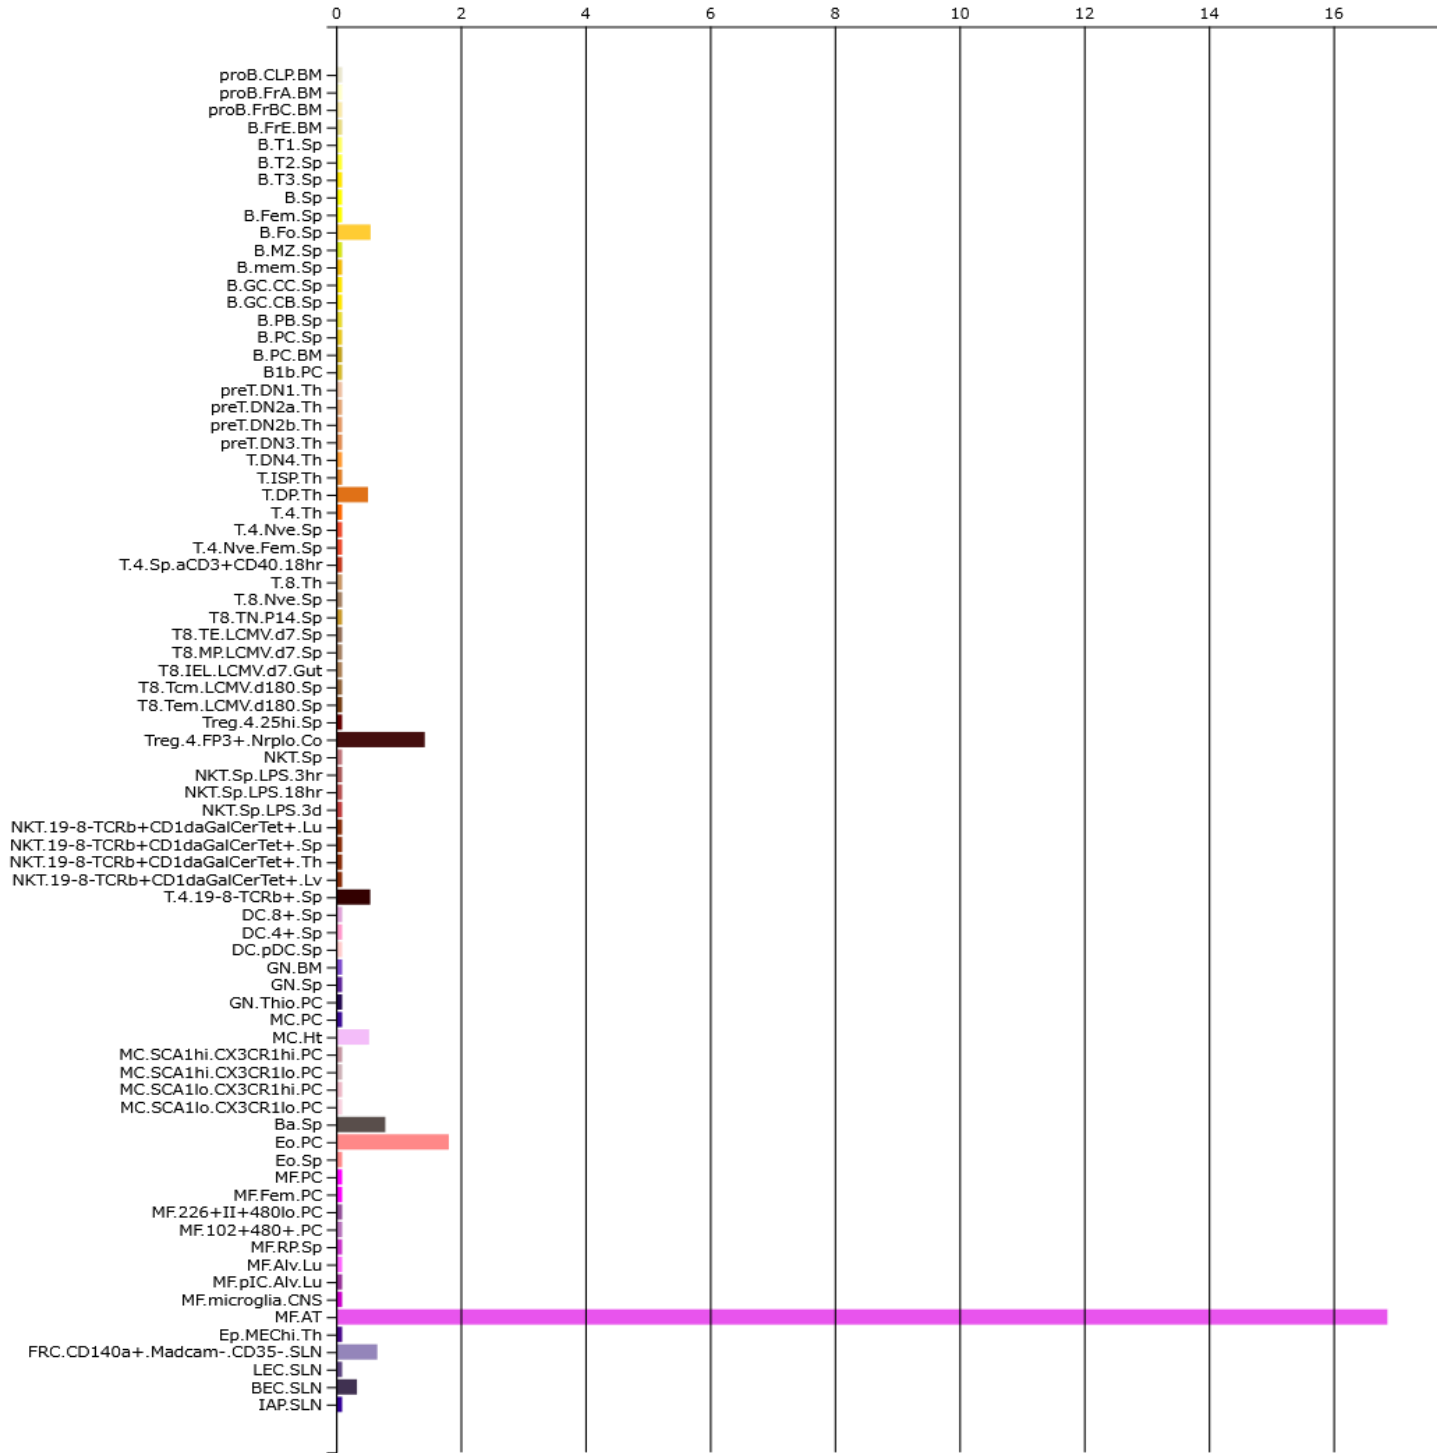

Expression Value Range

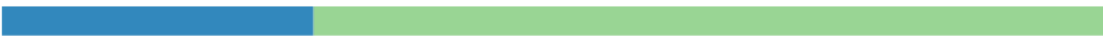

Supplement: DataSheet_1.pdf [file DataSheet_1.pdf]
