# Supplementary material for: Tas2R signaling enhances mouse neutrophil migration via a ROCK-dependent pathway
Source: PubMed Central journal article supplement (PMC9436316; doi:10.3389/fimmu.2022.973880), 2022-08-18
Supplement: Table_1.pdf [file Table_1.pdf]

## Supplementary Table 1

|                   |                                  |
|-------------------|----------------------------------|
| CRISP-Cas9        |                                  |
| gRNA for Tas2r    | 5'-AGTGTTTTTGATCCCAATAG-3'       |
| gRNA for Tas2r    | 5'-TGGAAGTGAGCTCATCTACG-3'       |
| Genotyping PCR    |                                  |
| Fw1               | 5'-AGGGGTCTTTCCAAGCACTC-3'       |
| Rv1               | 5'-CCACCTGCTCTTTGAGGTTC-3'       |
| Fw2               | 5'-CACACCTGGGGCTGCTTGGT-3'       |
| Rv2               | 5'-TTGGCCAGGGCTCTCACTGC-3'       |
| qPCR              |                                  |
| $\beta$ -actin Fw | 5'-CAGCTGAGAGGGAAATCGTG-3'       |
| $\beta$ -actin Rv | 5'-TCTCCAGGGAGGAAGAGGAT-3'       |
| Tas2r126 Fw       | 5'-GTGTGTGGGATTGGTCAACA-3'       |
| Tas2r126 Rv       | 5'-GCTCCCGGAGTACTCAACC-3'        |
| Tas2r135 Fw       | 5'-CCATCATGTCCACAGGAGAA-3'       |
| Tas2r135 Rv       | 5'-TCAGTAGTCTGACATCCAAGAACTGT-3' |
| Tas2r143 Fw       | 5'-CAGGCATCTTTTTGAACTCCA-3'      |
| Tas2r143 Rv       | 5'-TCTTCAGGGCCTTTCTCAGT-3'       |
